# Supplementary material for: Computational Design of a PDZ Domain Peptide Inhibitor that Rescues CFTR Activity
Source: PLoS Comput Biol. 2012 Apr 19;8(4):e1002477. doi: 10.1371/journal.pcbi.1002477 (PMC3330111; doi:10.1371/journal.pcbi.1002477)
Supplement: Table S1 — Binding data from CAL HumLib peptide array. (PDF) [file pcbi.1002477.s001.pdf]

Table S1: Binding data from CAL peptide array.

| ID     | Sequence      | BLU    | ID     | Sequence     | BLU   | ID     | Sequence     | BLU   |
|--------|---------------|--------|--------|--------------|-------|--------|--------------|-------|
| O60591 | NALleepKGTTRL | 289032 | P35913 | PAPKSTCCIL   | 59847 | P25024 | TSSSVNVSSNL  | 34050 |
| P50150 | FREKKFCTIL    | 244862 | Q9Y698 | SNTANRRTPV   | 59748 | P27037 | NVDFPPKESSL  | 33908 |
| P23508 | NSRPHNETSL    | 233260 | Q9NP72 | GGACGGYCSVL  | 59689 | P05181 | PRYKLCVIPRS  | 33756 |
| Q9Y289 | SSTCILQETSL   | 212567 | P02404 | RRHWRRTKLGL  | 59368 | O43196 | QEVLPAAATSL  | 33683 |
| Q9UL62 | DGQEEQVTTTL   | 201912 | O15439 | PSTLTIFETAL  | 58805 | Q9UKG9 | DMIQLMNSTHL  | 33674 |
| P52790 | VACRLAQLTRV   | 192017 | Q15760 | PINSNPPNTFV  | 58371 | P01705 | FGGGTRVTVLS  | 33549 |
| O60760 | NWIKRRPQTKL   | 187987 | P35354 | TVLLKERSTEL  | 58317 | Q15067 | YKHLKSLQSKL  | 33517 |
| P22749 | LRLCIPSTGPL   | 163083 | O43365 | RIQEAPKLTHL  | 57789 | P53778 | LGARVSKETPL  | 33385 |
| P09017 | EQQAEDITRL    | 154368 | P98066 | KNFLAGRFSL   | 56857 | P30443 | GSDVSLTACKV  | 33337 |
| P34998 | SFHSIKQSTAV   | 152494 | P21941 | KRLAILENTVV  | 56571 | P36382 | SSKARSDDLSV  | 33248 |
| P25025 | GSSSGHTSTTL   | 151871 | P20020 | GSPLHSLETSL  | 55717 | Q13613 | SHSATSVHTSV  | 33234 |
| Q30352 | HHHHTLPGSVQ   | 147564 | O95477 | LQDEKVKESYV  | 55519 | P17252 | QFVHPILQSAV  | 33168 |
| P00973 | QAEEDWTCITL   | 144120 | P15153 | TRQQKACSL    | 55320 | Q13255 | LRDYKQSSSTL  | 33132 |
| Q14135 | SYRRPPSATCV   | 139137 | Q9Y2T5 | KPRKRANSCSI  | 53958 | P56748 | SPSVYSRSQYV  | 33010 |
| Q14916 | DWAKEKQHTRL   | 129725 | Q14155 | MNDPAWDETNL  | 53933 | P47211 | DTPPSTNCTHV  | 32555 |
| P30670 | PFRPQKVCSTL   | 128534 | O60896 | VWRSKTDTLL   | 53200 | P00352 | TVTVKISQKNS  | 32552 |
| Q01668 | LADEMICITTL   | 122709 | Q9UBN1 | VSMLNRRTPV   | 53010 | Q12951 | GVLYPREGTEV  | 31988 |
| Q99527 | EQSDVRFSSAV   | 122169 | P07951 | LDNALNDITSL  | 52634 | P47890 | KLIWVRKIHSV  | 31948 |
| O15049 | PWSPRLESSKI   | 122101 | P23219 | GPAVERSTEL   | 52229 | P46089 | IPFRSRSPSDV  | 31937 |
| Q9UJW7 | CGKGFSYSSVL   | 117998 | P35914 | SSKVAQATCKL  | 50529 | Q92667 | AQWVDSYYSYSL | 31882 |
| P12034 | SVKYLKFRFG    | 117990 | P09104 | AGHNFRNPSVL  | 50202 | P21757 | HSEDAGVTCTL  | 31842 |
| O15287 | FRTSLPKSCDL   | 117487 | O75792 | LERGLESATSL  | 50077 | O43281 | QFTTLLTSLAP  | 31721 |
| P56381 | SNVKKIVKKKE   | 116107 | Q9Y2T3 | GKQVVPFSSSV  | 49757 | P09958 | RTAFIKDQSAL  | 31438 |
| O60359 | NNPANRRTPV    | 107942 | P47872 | QSQGTCTRSII  | 49280 | Q9UHE8 | KINKTEICSQL  | 31269 |
| O14862 | TIKVIKAKKKT   | 107439 | P28335 | SSVVSERISSV  | 49257 | O94956 | GPGKKPEDSRV  | 31225 |
| Q15418 | RRVRKLPSTTL   | 107169 | O00764 | DPEIVVQATVL  | 49083 | P01733 | TFGSGTRLTVV  | 31107 |
| Q13936 | LQDSRVYVSSL   | 106809 | P30872 | NGTCTSRITTL  | 48357 | P53992 | VREIGTVTYLM  | 30958 |
| Q92834 | TERRSKSTCIL   | 104909 | P11766 | GKCSRTVVKI   | 48003 | P12756 | KYRLIYLCFSV  | 30917 |
| P13569 | ETEEEVQDTRL   | 103406 | P18462 | GSDMSLTACKV  | 46986 | P06887 | FGTGKVTVLR   | 30832 |
| P14415 | RVAFKLRLQTL   | 102531 | P46721 | VLKDDDELTKL  | 46419 | P01716 | FGGGTRLTVLS  | 30829 |
| Q13011 | KELKTVTFSKL   | 101678 | P35499 | TVRPGVKESLV  | 45998 | Q9ULV3 | PLPRSTRLKT   | 30410 |
| P48448 | WGMGSQSTCTL   | 101596 | Q93070 | TSVIFSKSRV   | 44955 | P35715 | YRPRRKTCTL   | 30356 |
| Q99712 | LRTLLQLQSNV   | 100826 | P45844 | FVLRYKIRAER  | 44835 | Q15392 | STTWCRWCWCP  | 30345 |
| O14578 | QVNVKVDQSSV   | 99732  | P41240 | LEHIKTHELHL  | 44003 | P04435 | HFGDGTLSIL   | 30134 |
| P05997 | FGVEIGPVCFV   | 98936  | P33993 | VNASRTRITFV  | 43608 | Q03112 | ESSAIQSISHV  | 30088 |
| Q06495 | ALPAHNATRL    | 98912  | P01704 | FGGGTYVTVLR  | 43373 | Q9Y6H6 | HVYIKNRVSMI  | 29974 |
| Q16581 | NVISERNSTTV   | 98814  | P08588 | CRPGFAESKSV  | 43358 | Q01524 | VMGINHRFCCL  | 29895 |
| P16473 | QISEEYMQTVL   | 98102  | O75616 | VDIRLSVKLLK  | 43271 | Q16254 | CDLFDVPVLNL  | 29844 |
| O00476 | EWAKERKLTRL   | 97639  | Q14166 | QPGGCHVTCVL  | 43038 | P30305 | RRELCSRLQDQ  | 29760 |
| P56539 | SLKVVLRKEV    | 97400  | O14905 | RLVAFSCHCQV  | 43010 | P17655 | DLISWLCFSVL  | 29748 |
| O95377 | RPRDHVKKTL    | 94806  | P25445 | SNFRNEIQSLV  | 42930 | O43555 | PRPAPPSSNKV  | 29696 |
| Q10588 | LFLVLASRTQL   | 92449  | P28222 | FHKLIRFKCTS  | 42792 | Q15165 | TLYHRALCYEL  | 29687 |
| O60299 | SRLERIESTEL   | 88885  | P11169 | IEPAKETTTNV  | 42750 | P54852 | GIYIHLRKRE   | 29508 |
| P51843 | DMMLEMCTEIKI  | 87919  | O43929 | RQWATSSLSWL  | 42420 | P50539 | SSASVKLSFTS  | 29499 |
| P53618 | KINLSQKETSI   | 86001  | P32241 | SSSFQAEVSLV  | 42325 | P15313 | RLQDLAPDTAL  | 29484 |
| P13056 | IHFTRRAITDL   | 84892  | Q9UG63 | EPQLTKRTHNV  | 41737 | O60229 | LGPDPFSTYV   | 29440 |
| Q08426 | QSLAGSPSSKL   | 84380  | Q15303 | PPPYRHRNTVV  | 41456 | P55060 | GYLQAASVTLL  | 29439 |
| P35222 | SNQLAWFDTDL   | 83064  | O75015 | TGLYFVSVKTN  | 41339 | P48065 | GLIAGEKETHL  | 29392 |
| P09543 | KGGALQSCSTII  | 82568  | Q00056 | PSTSTPVPSSI  | 41120 | P20769 | YSTTVTLFKVK  | 28978 |
| O14972 | TENFPLKLCRI   | 82301  | P47775 | LAQRARSFSDV  | 40656 | P10767 | IMTVTHFLPRI  | 28841 |
| Q12979 | KRNTLYFSTDV   | 80217  | Q15139 | MKALGERVSIL  | 40514 | O75964 | IGKRGIHYDV   | 28752 |
| Q00722 | IAKADYAQESRL  | 80178  | P41595 | GDKTEEQVSYV  | 40388 | Q05066 | QRDRYSHWTKL  | 28664 |
| P27816 | TLDSQIQETSI   | 80125  | P20809 | VRGLLLKCTRL  | 40249 | P26599 | HLRVFSKSTI   | 28643 |
| O14832 | ARLVKQERTNL   | 79085  | P30044 | CSLAPNIISQL  | 40000 | O95336 | LTVPFEKHSTL  | 28566 |
| Q15349 | RGMKRLSTRNL   | 78837  | Q9ULD4 | GPHSFVTSSYL  | 38658 | Q99765 | QSFCITVLVSSI | 28565 |
| O95049 | DGYDWGPATDL   | 77093  | P23378 | SPFSEQKRASS  | 38408 | O95822 | LVAQFQKNSKL  | 28513 |
| P56730 | FVPWIKSVTKL   | 77071  | P15529 | ETHREVKFTSL  | 38289 | P55082 | YKDGAYENCQL  | 28494 |
| Q15126 | ENLIEFIRSL    | 77065  | P14679 | EDYHSLYQSHL  | 38112 | Q01453 | GVIYVILRKRE  | 28436 |
| P02654 | QKVVEKRLKIDS  | 76930  | P01135 | RTACCHSETTV  | 38003 | O43924 | VSTRVRVLFYV  | 28284 |
| O95998 | GKGKGLCQSSSL  | 76290  | Q13324 | SFHSIKQTAAV  | 37825 | Q13574 | MIQREDQETAV  | 28264 |
| P51812 | RGIKKITSTAL   | 75629  | P10267 | SKRDQIVTVSV  | 37815 | Q15147 | AEMDRRPPATV  | 28149 |
| P35346 | AANGLMQTSKL   | 75304  | P11234 | KKSFKERCCLL  | 37190 | Q15040 | VEAHQSWRTDV  | 28111 |
| P98153 | RHSRSLNTVV    | 74938  | Q13268 | NIAVAGYSTRL  | 37168 | Q13336 | QAKKRMVESPL  | 28087 |
| Q01814 | GSPIHSLSTSL   | 73965  | Q92911 | DGGRDQQETNL  | 36869 | O95969 | VLVKILKKCSV  | 28062 |
| Q00597 | RELLKELRTQV   | 73874  | O43749 | KKVVGVRVFSV  | 36643 | P09874 | KLKFNFKTSLW  | 27981 |
| Q14940 | WCIFQFNRCSTL  | 73802  | P08311 | FKLLDQMETPL  | 36515 | P30046 | IGKIGTVMTFL  | 27956 |
| P05981 | HSEASGMVTLQ   | 73447  | P54709 | GRVMFKITARA  | 36419 | P09430 | DDANRNYRSHL  | 27855 |
| P11274 | KRKSLFSTEV    | 72848  | Q14524 | PSPDRDRESIV  | 36278 | Q15166 | TVFGKTYLCEL  | 27820 |
| Q14165 | FIPTLFLCRL    | 72701  | P54851 | GMMYLILRKRL  | 36213 | O43613 | VVLTSVTTVLPL | 27793 |
| P02452 | FGFDVGPVCFL   | 71152  | P19320 | YSLVEAQKSKV  | 36164 | P46095 | VPFRSRSPSEV  | 27759 |
| P31249 | RLPEAPKLTHL   | 70828  | P01702 | FGGGTRVTVLG  | 36142 | Q14195 | PGGRSNITSL   | 27722 |
| O75593 | GPWLLSWCSL    | 70639  | P41594 | IRDYTQSSSSL  | 36079 | O60756 | MLLLLLLNYNM  | 27687 |
| Q12768 | NFIFDEFRTVL   | 70518  | P56750 | TMLSKTSTSYV  | 35901 | Q13201 | TTFSGYLLYRT  | 27684 |
| O14904 | RVVTRPCQCVQ   | 69941  | Q9UKP5 | SSCNLAKETLL  | 35557 | P49418 | LFPENFTRRLD  | 27582 |
| O00633 | DEDQHTQITKV   | 68498  | P09016 | AKDHHTDLTTL  | 35512 | O14924 | PKTSAHHATFV  | 27510 |
| P02461 | FGVDVGPVCFL   | 68469  | O14775 | GSWDHTLRVWA  | 35356 | P22303 | HYSKQDRCSDL  | 27442 |
| P33402 | IGTMFLRETSL   | 68116  | P43353 | MEAQGCSCSTL  | 35208 | P11168 | EMKFLGATETV  | 27434 |
| P41587 | QSFLQFETSVI   | 67977  | Q9Y517 | TAKMYAVDTRV  | 35001 | P09693 | SHLQGNQLRRN  | 27404 |
| P07942 | SKQVAVYSTCL   | 66823  | Q01970 | DSESQEENTQL  | 34814 | O14493 | AARSAASNYV   | 27350 |
| P23510 | IHQNPGEFCVL   | 66775  | P19961 | PFIHAIHESKL  | 34618 | Q01118 | AEKESPIQSQI  | 27258 |
| P11233 | AKRIRERCCLL   | 62913  | P23560 | CVCTLTIKRGR  | 34434 | P16106 | QLARRIRGERA  | 27254 |
| O43451 | NFTSLTWISTL   | 62533  | P32745 | EKSSMTMRISYL | 34401 | Q14517 | PPLDSQHQTEV  | 27163 |
| Q15668 | WEIPVQIVSHL   | 62507  | P48067 | NGSSRLQDSRI  | 34400 | P25800 | QLNGTFESQVQ  | 27142 |
| P43250 | SDSEELPTRL    | 61813  | P01700 | FGGGTQLTVLR  | 34277 | P33240 | KEQIQKSTGAP  | 27016 |
| Q43711 | SKKVPATVSLV   | 61382  | Q9UBX5 | RLRIYVSYQPF  | 34210 | P28906 | ARQHVVDATL   | 26943 |
| P50995 | KILLKICGND    | 61296  | P18077 | RIRVMYPSRI   | 34176 | Q12959 | SYIWWPAKEKL  | 26911 |
| P25054 | RHSGSYLVTSV   | 60515  | Q16348 | MIKLETKTKKL  | 34156 | P08949 | YRRLVLQILQK  | 26848 |
| P02458 | FGVDIGPVCFL   | 60447  | Q06889 | VSLAPVVTTC   | 34051 | P56937 | DNQARLSGSC   | 26839 |

ID: ID from Uniprot Database (<http://www.uniprot.org/>) Sequence: Listed sequences match the Uniprot ID, but for the array experiments and for the computational predictions, the cysteines were changed to serine. NA: not available. BLU: biochemical light unit.

Table S1: Binding data from CAL peptide array.

| ID     | Sequence       | BLU   | ID     | Sequence     | BLU   | ID     | Sequence      | BLU   |
|--------|----------------|-------|--------|--------------|-------|--------|---------------|-------|
| O15228 | TPIGKPATAKL    | 26812 | P28698 | LIQHQRVHSAE  | 24477 | Q13009 | FAPSRKLNTEI   | 23706 |
| Q13490 | IKGTVRTFLS     | 26743 | O15427 | GEVVHTPETSV  | 24463 | P16234 | DSSDLVEDSFL   | 23695 |
| Q15743 | GS GGFP TGR LA | 26646 | O60469 | NNPYAKSYTLV  | 24449 | Q03060 | TLKDICS PKTD  | 23689 |
| P01730 | PHRFQKTCSP I   | 26595 | P03923 | VYIVIEIARGN  | 24446 | P98073 | RFTEW IQSFLH  | 23689 |
| P46937 | KLDKESFLT WL   | 26594 | P01703 | FGGGTKLTVLR  | 24424 | P53701 | RMKVAWWRWTS   | 23686 |
| P05163 | DGDFKIKVRGL    | 26588 | O94823 | SHRRSQSLTI   | 24421 | P05121 | TVLFMGQVMEP   | 23673 |
| P07766 | DLYSGLNQRR I   | 26525 | P28331 | GAQAVEEPSIC  | 24411 | P35228 | VQPSSEMSAL    | 23669 |
| P07339 | NRVGF AEAA RL  | 26330 | P11182 | ENPAFMLDLK   | 24396 | O14737 | KVMDSD EDDDY  | 23668 |
| Q15738 | VQSFRLRRVK     | 26144 | O76015 | TCGASTTGS RF | 24394 | Q9NXH9 | GP GAAAGPGID  | 23664 |
| P01773 | WGQGT LVT VSL  | 26023 | P08913 | ILCRGDRKRIV  | 24391 | P55196 | GKRV TNQLSL S | 23663 |
| Q16048 | LGRVYQSCWQV    | 26012 | Q09019 | QPGNSPSGTVV  | 24386 | Q15818 | KWTFEACRQIN   | 23653 |
| P24539 | LAKKAQAQPMV    | 25963 | P47881 | WRMLTGRRSLA  | 24378 | Q16853 | PAFSGHGGFSHN  | 23647 |
| O75604 | FYELASPTSPI    | 25940 | O60676 | FTVMEKKCEDA  | 24363 | O60248 | LAGAPMPLTHL   | 23647 |
| P35555 | NLKMKIQVLLH    | 25927 | P03996 | AGPSIVHRKCF  | 24331 | O15431 | AVVVDITEHCH   | 23639 |
| Q11201 | SINKIRIFKGR    | 25906 | P45381 | LNAKSIRCCLH  | 24319 | P04437 | FGTGTRLQVTL   | 23635 |
| P04208 | GGLGTTLT VLS   | 25848 | Q14249 | GS LKAITAGSK | 24308 | Q10589 | IVLLGLSALLQ   | 23621 |
| Q92628 | SEEEFLSRTHL    | 25820 | P35080 | ELALYLRRSDV  | 24281 | P18825 | LFRRRRRGFRQ   | 23618 |
| P51164 | GKVEFKLKIEK    | 25771 | P08620 | TMKVTHFLPRL  | 24255 | Q92903 | EKGILQPTLVK   | 23615 |
| P36507 | NQPGTPTRTAV    | 25768 | Q12983 | GRRLTSTSTF   | 24255 | P30559 | SQRSCSQPSTA   | 23603 |
| P10809 | GMGGMGCGMF     | 25767 | P12694 | GEHYPLDHFDK  | 24251 | Q14203 | QLHQLHSRLIS   | 23600 |
| P48047 | QKLGRAMRNV     | 25731 | O00341 | TIQISELTNV   | 24236 | Q14790 | TLRKKLVFPDS   | 23588 |
| P57735 | LGEKRACCISL    | 25729 | O95371 | RRLLGKGREVG  | 24236 | P51398 | PSLLERHCAYL   | 23586 |
| Q05682 | SVDKVTSP TKV   | 25704 | P55040 | KSKSCHDL SVL | 24226 | P05177 | EHVQARRFSIN   | 23584 |
| P52948 | APPPQVEKKGQ    | 25695 | O00322 | MLIAMYFYTML  | 24223 | P36222 | TNAIKDALAAT   | 23583 |
| O75912 | VIGHEDELTAV    | 25679 | P24347 | FGIAEAPANTFL | 24220 | Q15878 | LLSDTEEDDKC   | 23571 |
| P05091 | TVT VKVPQKNS   | 25673 | P49821 | AQQHQARQAAS  | 24199 | P24298 | RFHAKFTLEYS   | 23569 |
| O43309 | PEWQSCFRRLD    | 25658 | P37058 | VAYLKLNTKVR  | 24192 | P12110 | EPGPPGDPGLT   | 23564 |
| P26885 | ELLKIERRTL     | 25624 | P13349 | ASSRLIYHVL   | 24180 | P15586 | VRTRRF SKHLL  | 23562 |
| O75690 | CCVPICQCKI     | 25596 | Q16531 | IKVVEELTRI H | 24178 | Q12950 | LRRRKRFQRHQ   | 23554 |
| Q14330 | RSLSNINSEML    | 25578 | P01816 | WGQGILVTVSS  | 24172 | P56746 | SFGKYGRNAYV   | 23551 |
| Q9UJT1 | LEQVVASYCNL    | 25576 | Q99583 | PSFPVSTLKL A | 24121 | P17317 | LIGKKGQKQTV   | 23540 |
| P01709 | FGTGT KVTVLG   | 25487 | P40261 | SLVARKLSRPL  | 24120 | O60551 | TDSEKVGILVQ   | 23536 |
| P48436 | EQPVYTQLTRP    | 25455 | P41222 | LPQTDKCMTEQ  | 24110 | Q9UH64 | WARVWGVIQLPG  | 23531 |
| P78508 | GSALSVRISNV    | 25417 | P13667 | ATKLSRTKEEL  | 24108 | P21953 | CYDALRKMINSY  | 23524 |
| P00846 | LLVSLYLHDNT    | 25370 | P13725 | KRLMTRGQLPR  | 24085 | P23142 | NVRIFVSEYWF   | 23494 |
| P25100 | ADYSNLR ETDI   | 25365 | P05166 | RPWRKHANIP L | 24082 | P47900 | PEFKQNGDTS L  | 23479 |
| Q02363 | LMSNDSKALCG    | 25335 | P47893 | WQIFLGRSLT   | 24071 | P34810 | IRRRPSAYQAL   | 23474 |
| Q99489 | ALRTPIPKSNL    | 25334 | O00624 | LPASEDIKLQT  | 24065 | P19338 | HKPQGGKTKFE   | 23446 |
| P42857 | EQETEA AEKSA   | 25311 | P08579 | SHAMKITYAKK  | 24065 | P29122 | QFC CRTCLLAG  | 23441 |
| P30837 | TVTIKVPQKNS    | 25305 | O75947 | PYPWHPQPIENL | 24058 | P08908 | KKIKCKFCRCQ   | 23432 |
| Q09327 | PARGKLDEAEV    | 25281 | P25942 | KESRISVQERQ  | 24032 | P32456 | SKSLEPICNIL   | 23431 |
| P22830 | ETKSFTSQQL     | 25268 | Q9NQ66 | DIPGKEFDTPL  | 24018 | Q16621 | VPRG TKMEATD  | 23419 |
| P22692 | DCHQLADSFRE    | 25262 | P43007 | APELESKESVL  | 24002 | Q15077 | KLTAKWQRQGR   | 23419 |
| Q14957 | WRRISSESEV     | 25249 | O95236 | IYQRLNPCHTH  | 24001 | P12036 | KATEDKAAKKG   | 23416 |
| P01699 | FGGGTKVTVLG    | 25248 | P14920 | KKLSRMPPSHL  | 23998 | Q9UNI6 | LPVLGSQTGKI   | 23414 |
| P23634 | DSSQLSLETSV    | 25202 | Q15072 | HHIRHQKIHTH  | 23974 | P08174 | LGT LVTMGLLT  | 23413 |
| Q13607 | KFSGLTSKLAT    | 25167 | Q04446 | ALILQNVDLPN  | 23965 | O75899 | PPSFRVMVSLG   | 23413 |
| P28838 | EFLLRFSQDNA    | 25151 | O75521 | VNFLSRKSKL   | 23957 | Q14934 | FPAPPGEPPA    | 23413 |
| P20813 | PPTYQIRFLPR    | 25117 | Q01101 | ILLQVVP RPAC | 23947 | Q05215 | FYSLGLSFASL   | 23398 |
| O60503 | ELTKLNVSKSV    | 25116 | Q15647 | SLNQAVVSKLA  | 23936 | P09619 | APRAEADSFL    | 23397 |
| O95990 | IATLTSEEREL    | 25102 | P11166 | LFHPLGADSQV  | 23934 | P51582 | SSCSTPRADRL   | 23395 |
| Q9UNAO | SAFKCQLLKKC    | 25083 | P48426 | RFLDFIGHILT  | 23925 | P00558 | LPGVDA LSNIL  | 23382 |
| P28223 | SDGVNEKVSVC    | 25020 | Q9UHG3 | DGLYEKLKTEL  | 23924 | Q14592 | NGFIVEETLPL   | 23381 |
| Q14416 | REVVDSTSS L    | 24980 | P08651 | GIYQAQSWYLG  | 23920 | O00321 | CAGGGRGAEATQ  | 23368 |
| P49913 | FLRNLVPRTES    | 24960 | P49646 | ASSYSSSYLGD  | 23920 | O95865 | LCLVLSTRPHS   | 23361 |
| Q05048 | ARFWYRRSTTD    | 24937 | Q9UHT4 | QFFILITITKY  | 23911 | P01028 | LQEYGTQGCQV   | 23359 |
| Q15062 | ERDSRESWRAA    | 24933 | P49146 | PNDSTFEATNV  | 23908 | Q9Y2Q3 | GPIPPAVNARL   | 23346 |
| Q14832 | REVLDSTSS L    | 24930 | P24071 | LTFARTPSVCK  | 23902 | O94777 | LKTKRVTKKAQ   | 23345 |
| P26436 | CCRNQSPCNKI    | 24913 | P56182 | QEPEKKKKRRE  | 23897 | O60669 | QSVTSERETNI   | 23323 |
| P98174 | PQSPANIYYKV    | 24897 | P06748 | IQDLVQWRKSL  | 23888 | Q9U110 | PVVLRVKSSDQ   | 23321 |
| Q16661 | LCVNVACTGCL    | 24877 | Q15124 | RTGRRGPTVIT  | 23886 | P30405 | KIVITDCGQLS   | 23319 |
| P11844 | VGSLRRVTDLY    | 24869 | Q16517 | VLGERRQAPN   | 23885 | P08912 | KLYWQGN SKLP  | 23318 |
| P37198 | EQERSFRITDP    | 24831 | P98095 | KMHFFTTFAL   | 23876 | Q15722 | ASSPLKLNELN   | 23311 |
| P01567 | TNLKKGLRRKD    | 24816 | Q08431 | RIALRLELLGC  | 23875 | Q13489 | TIKGTVRTFLS   | 23307 |
| P41208 | FLRIMKKTSLY    | 24809 | P03999 | STVSTQVGNP   | 23875 | P27707 | VEKVKEFLSTL   | 23306 |
| Q07815 | TRCLRMRP PRS   | 24793 | P41146 | CKTSETVPRPA  | 23872 | P06576 | KADKLAEHSS    | 23301 |
| P43003 | TEKPIDSETKM    | 24775 | P06318 | VFGGTRLT VLG | 23871 | P42696 | RFRSLVCFIPP   | 23294 |
| Q10713 | GRLPRTYRLFR    | 24761 | Q12982 | NGKQDEPKNEQ  | 23869 | P00740 | VNWIKEKTKLT   | 23291 |
| P22914 | PAVQS FRRIVE   | 24760 | P08100 | SKTETSQVAPA  | 23861 | P13798 | AVLWLRTHLGS   | 23289 |
| Q02086 | HYKTHLVTKNL    | 24760 | Q92466 | IWSQEEARTRK  | 23859 | Q01518 | KLVTTVTEIAG   | 23283 |
| Q14961 | LEMTRKRVLHA    | 24755 | O75438 | ELQPSEEV TWK | 23859 | P28328 | SGIEMSEVNAL   | 23279 |
| P53634 | IAVAATPIPKL    | 24741 | P10515 | KYLEKPI TMLL | 23856 | P48444 | TTFLVDKYEIL   | 23273 |
| P12838 | VSFTYCCTRVD    | 24720 | P06729 | AAENSLSPSSN  | 23839 | O43169 | YRYYTSESKSS   | 23262 |
| P32926 | LCTEDPCSR LI   | 24644 | Q05586 | QLQLCSRHRES  | 23837 | Q15121 | IIKLGPPPKKA   | 23262 |
| P15169 | MEMRQLQRGPA    | 24636 | O15519 | TLRKKLILSYT  | 23824 | P42356 | MIQYYQNDIPY   | 23255 |
| P51178 | ATLFVKISLQD    | 24622 | O00408 | PINGCCSLDAE  | 23821 | P53677 | MTKAGKFQVRT   | 23254 |
| O15511 | IVRLTARKTV     | 24613 | P20800 | PRSTHSRWKRK  | 23818 | Q9Y263 | SECCRFILNLL   | 23252 |
| Q92826 | VLA VKTNSATP   | 24575 | O43709 | LVWPLMAHMT   | 23815 | P13497 | FRVKRNRTPQ    | 23251 |
| Q14181 | SPCIAVQVVRI    | 24564 | O43933 | MFRPGQKVTLA  | 23811 | Q14656 | PRFHPSGGKTR   | 23248 |
| P11836 | ESSPIENDSSP    | 24563 | P27169 | TVFHKALYCEL  | 23808 | P13284 | TSLSRLSVCFK   | 23247 |
| P26371 | CCVPVCYQCKI    | 24557 | P50151 | PFREPRSCALL  | 23806 | O60238 | KRLSTPSASTY   | 23244 |
| Q9UK32 | RS MKKRTSTGL   | 24545 | P10316 | EGLPKPLTLRW  | 23799 | P49641 | MEIATFRLRLG   | 23239 |
| Q99679 | RSKGPLNGCHI    | 24544 | P46459 | REEGASPLDFD  | 23781 | P04001 | MEIATFRLRLG   | 23237 |
| Q12882 | RGVPLSVNPVC    | 24532 | P30939 | KAFQKLVRCRC  | 23777 | P22059 | KQDWSSCPDIF   | 23236 |
| P35372 | ENLEAETAPCL    | 24525 | P04234 | SHLGGNWARNK  | 23763 | Q9UK08 | FRDKRLFCVLL   | 23229 |
| P04066 | FAWTIKLTGVK    | 24512 | P03951 | VDWILEKTQAV  | 23760 | O15120 | ATAGSGVQPAQ   | 23220 |
| Q13614 | AQCVTPVQTVV    | 24492 | Q12981 | YIVKKRLFPFL  | 23722 | O15145 | FMNKSLSGPGQ   | 23218 |
| O60241 | EPPDGD FQTEV   | 24486 | P53420 | ISRCQVCVKYS  | 23710 | Q9Y2G3 | LTLSTMDSSSTC  | 23215 |

ID: ID from Uniprot Database (<http://www.uniprot.org/>) Sequence: Listed sequences match the Uniprot ID, but for the array experiments and for the computational predictions, the cysteines were changed to serine. NA: not available. BLU: biochemical light unit.

Table S1: Binding data from CAL peptide array.

| ID     | Sequence     | BLU   | ID     | Sequence     | BLU   | ID     | Sequence     | BLU   |
|--------|--------------|-------|--------|--------------|-------|--------|--------------|-------|
| P30988 | PLNIEQESSA   | 23214 | Q9UKL4 | GRTQSSDSAYV  | 22962 | P00387 | VGHPTERCFFV  | 22767 |
| Q05315 | LTKFNVSYLKR  | 23210 | P47972 | VETCEEALLDL  | 22961 | P49069 | ELLDYWGSEVP  | 22766 |
| Q9Y3D2 | SVALKFPKPRKH | 23209 | Q14118 | PYRSPPPYVPP  | 22958 | P42695 | SLRKTPLKLTAN | 22766 |
| Q13555 | SKPIHTTILNP  | 23208 | P52798 | LLLILRLRL    | 22956 | P98088 | LTSKENLPYVL  | 22761 |
| Q15642 | VPTSYLRVTLN  | 23204 | Q9Y210 | SMEPNQEETNR  | 22952 | Q16555 | PGGRANITSLG  | 22754 |
| P19174 | RRTRVNGDNRL  | 23193 | O60397 | IQLSMDQKSDK  | 22950 | P15538 | MCPLLTFRIN   | 22753 |
| O14834 | SPKDYSTKYRY  | 23191 | P01720 | FGTGTMTVTVLG | 22948 | P10635 | PSPYELCAVPR  | 22752 |
| Q02962 | PAARAAAYDRH  | 23182 | O95967 | RLTVFVGAYTF  | 22938 | O00244 | TGKTVSYLGLE  | 22751 |
| Q9Y4L1 | GQKRPLKNDL   | 23179 | P16591 | KELTIHKRLT   | 22938 | P42345 | CQCYIGWCPFW  | 22750 |
| O14683 | CLQAEAFNPSP  | 23178 | Q15365 | RLSSEKGMGCS  | 22927 | P41271 | APHTEEEGAED  | 22749 |
| O75340 | EQYLSMVFSIV  | 23177 | P30953 | VIHQKKTFFSL  | 22926 | Q15119 | EPKNTSTYRVT  | 22749 |
| P16415 | WLTCLLRHERI  | 23176 | Q99487 | TPGAPHHLSSL  | 22922 | P55771 | EGSHSVTASAL  | 22746 |
| P50290 | GWRPASLRSWG  | 23169 | Q14061 | KECMRALGFKI  | 22914 | Q01718 | FKKMIFCSRYW  | 22744 |
| O75748 | TSMNERETGML  | 23168 | P50606 | LIGLHFKIKPI  | 22913 | Q13938 | FVAMMTSAWQL  | 22742 |
| Q02846 | KLEKARPGQFS  | 23155 | Q13772 | EKWLYRTPQLM  | 22900 | P05120 | CILFFGRFSSP  | 22742 |
| Q99943 | GDYLLKPGGGG  | 23145 | Q13046 | VTVRVSDWTL   | 22900 | P09668 | AACASYPIPLV  | 22740 |
| Q10586 | LSRYQAQHGAL  | 23138 | P01713 | FGAGTKLTVLR  | 22897 | Q09472 | SNLSQSTLDIH  | 22739 |
| P22079 | LDLSPWASVKM  | 23126 | Q9UN36 | GPPGHTMEVSC  | 22893 | O75343 | IRRFINSQFVL  | 22738 |
| Q99677 | NGGELMLESTF  | 23125 | O14598 | SKGRPSTPLSP  | 22890 | P80095 | SFIEQVAVSMT  | 22738 |
| P07550 | GRNCSTNDSL   | 23124 | Q15438 | RKKKVSSTKRH  | 22890 | P31935 | GLAYLEETKPL  | 22738 |
| Q92800 | YVGIERTDVL   | 23124 | Q16654 | EPKNLAKEVAM  | 22890 | P49189 | CVEMGDVESAF  | 22737 |
| Q13423 | LQAKVRESYQK  | 23124 | Q15366 | LSSETGGMGSS  | 22885 | O43638 | RRRRRTTRQTG  | 22737 |
| Q14990 | GSRFSCRKMIL  | 23123 | P11586 | DPETEQLVNGLF | 22882 | P39900 | KTLKSNSWFGC  | 22734 |
| P43119 | KAEASVACSLC  | 23123 | Q07444 | FIMLTRLVLSL  | 22877 | P51841 | KAERQLVRNKP  | 22733 |
| P38159 | RSDRGGGRSRY  | 23123 | Q15027 | LSRRSHDLHTL  | 22877 | P40126 | HLSSKRYTEEA  | 22731 |
| P04201 | NCNTVTVTETVV | 23119 | P49683 | HGQNMTVSVVI  | 22875 | P10145 | VEKFLKRAENS  | 22729 |
| P51160 | DDKKSCTCLML  | 23118 | P14923 | PPYPTADHMLA  | 22875 | O43422 | PTDNSETVENT  | 22728 |
| P02655 | DQVLSVLKGE   | 23115 | O75474 | RIALQPSGSL   | 22873 | P14406 | LAVASFPKKQE  | 22727 |
| P15259 | MEAVAAQGKAK  | 23115 | Q9ULV8 | AALGPQDPAPA  | 22871 | O95299 | TEVGDKWIWLK  | 22727 |
| O14863 | RTCANQCSSSP  | 23114 | P35268 | NQDEEEDEDED  | 22871 | P53355 | SYNSISSVSR   | 22726 |
| P15428 | YDTPFQAKTQ   | 23113 | Q08050 | INWSQFIPELQ  | 22869 | P02248 | TLHLVLRRLGG  | 22724 |
| P39210 | NSYLSWKAHRL  | 23112 | Q13093 | LQNSSGIEKYN  | 22869 | P07205 | ILPGVEALSNN  | 22722 |
| P20783 | VCALSRKIGRT  | 23112 | P18545 | ELHELAQYGH   | 22867 | Q9Y466 | LLSDMYKSSDI  | 22720 |
| Q9NRZ5 | GNSDSKQKLND  | 23111 | P34949 | DLIFFRACCL   | 22867 | Q12805 | RLTIIVGPFSS  | 22716 |
| P47888 | QDLLVGERSLT  | 23110 | Q99797 | LDFETFLMDSE  | 22860 | P06316 | FGGGTKLTVLG  | 22716 |
| O60701 | LQDPPNKKPKV  | 23101 | P20382 | LGRVYRCPWQV  | 22854 | Q07812 | TASLTIWKKMG  | 22715 |
| Q9NWB1 | YRGGYNRFAFY  | 23100 | O95936 | MGGYAFYTSF   | 22852 | P12724 | PVVPVHLDTTI  | 22715 |
| Q16720 | AAGNPGGESVP  | 23095 | Q16825 | LIQFLKSSRLI  | 22852 | O15453 | QGFLNPLEFSA  | 22714 |
| P02570 | SGPSIVHRKCF  | 23093 | Q09753 | TCYRGKAKCCK  | 22846 | P50542 | STLLTMFGLPQ  | 22713 |
| P05164 | ALNLASVREAS  | 23092 | P15954 | FLVVRHQLLKT  | 22843 | Q14507 | EASATLNSIVA  | 22712 |
| Q06830 | QKSKEYFSKQK  | 23089 | O95452 | SGQNATIGFPS  | 22842 | P08559 | ANQWIKFKSVS  | 22711 |
| O00409 | GKQEKKETTKN  | 23081 | P23759 | KKNSQMEQFT   | 22842 | P05165 | VGEGLDLVELE  | 22711 |
| Q15120 | PRDASKYKAKQ  | 23080 | O00571 | YNSQGVDDWWGN | 22840 | O15442 | IVIDLPTRNS   | 22710 |
| P78358 | FLAQPPSGQRR  | 23066 | Q03135 | SNVRINLQKEI  | 22839 | P28325 | ISILNYKCRKV  | 22710 |
| P00325 | SGKSIRTVLTF  | 23065 | P57088 | AFISRLAPTVP  | 22839 | Q08345 | RFLAEDALNTV  | 22709 |
| P31275 | KKRLLLREQAL  | 23065 | P13592 | LFSAVTLLLLC  | 22834 | P09622 | LAASFGKSINF  | 22709 |
| Q14353 | PQMILPLVTKG  | 23064 | P25105 | FNQIPGNSLKN  | 22834 | P02689 | GVVCTRIYKCV  | 22704 |
| P07738 | EDQGKVKQAKK  | 23061 | Q14690 | YVEAKSSVLED  | 22830 | Q9NTQ9 | GSAPVDAGGYP  | 22703 |
| Q9NYP3 | VLRDYYNWRSL  | 23060 | P12814 | FSTALYGESDL  | 22828 | P05496 | LMVAFILFAM   | 22702 |
| P30808 | PIPPPPPHQV   | 23059 | Q00604 | ILSCHCEECNS  | 22826 | O43186 | KDQSAWKFIQL  | 22701 |
| P01243 | QCRSVEGSCGF  | 23059 | P50391 | SLRLSGRSNPI  | 22826 | O15239 | YYVSKGLENID  | 22697 |
| P35663 | LPEAPWIHKLL  | 23057 | P78310 | IPAQSKDGSIV  | 22825 | P43155 | ALLQSHPRAKL  | 22696 |
| P15812 | LVVVDSRLKKQ  | 23050 | Q15048 | YGRLAADYFSL  | 22825 | P04118 | GICHDAGRSKQ  | 22696 |
| Q14562 | AWRISRAFRRR  | 23050 | Q14093 | DEKDKAKKKGK  | 22822 | P29536 | LKKVEVPKLLQ  | 22690 |
| O75306 | TQDIVGGEVDR  | 23050 | P07202 | GRDTHRLPRAL  | 22822 | O43674 | IDHSPKATPDN  | 22689 |
| P56589 | EAFSTPQLEK   | 23049 | P32119 | DDSKEYFSKHN  | 22818 | Q99871 | GAAAGSTTSAP  | 22688 |
| P35212 | PSSSASKKQYV  | 23046 | Q9UI46 | LNLVREVKIKT  | 22817 | P22966 | QFGSEVELRHS  | 22687 |
| Q15768 | PQSPNNIYKVV  | 23039 | Q92791 | EAEAEPEPELA  | 22815 | Q13021 | YLHAFSIYYH   | 22687 |
| P57055 | SSRGKCSYSSK  | 23033 | P47895 | TVTILGDKNP   | 22813 | O60312 | LLIGASSRRSQ  | 22685 |
| Q9UHZ2 | CQAGYDSEDDV  | 23033 | Q14938 | LSASDPGTATF  | 22811 | P30304 | KREMYRSLKKL  | 22683 |
| O60258 | TKRTRRPQLT   | 23032 | O94788 | TVTVPKIPQKNS | 22807 | O14967 | KSVRKRVRKRD  | 22682 |
| P49747 | EDYETQLRQA   | 23029 | P54849 | IGVLYLVLRKK  | 22805 | P19099 | TSPLLTFRIN   | 22681 |
| P13611 | RWSRRWQESRR  | 23028 | O00567 | KKKFHKASQED  | 22805 | P08697 | EEDYPQFGSPK  | 22679 |
| Q9UK55 | FLGRVNVPTLL  | 23023 | Q99807 | KRVAIYLSERL  | 22804 | Q16656 | GQAVEVVTLEQ  | 22678 |
| O15165 | KGKDRKPGNLV  | 23022 | P09529 | PNMIVEECGCA  | 22804 | P17643 | EKLQNPNSQSV  | 22678 |
| Q9UI56 | HEKPVSRPQNT  | 23022 | P09669 | MRKAGIFQSVK  | 22803 | P22413 | KTHLPTFSQED  | 22673 |
| P08237 | ITRKRSGEAAV  | 23016 | P78329 | GGLWLRVEPLS  | 22802 | Q02413 | ITKYSTVQYSK  | 22672 |
| O14511 | PPRAKQDSAPL  | 23012 | O60262 | PFKDKKPCIL   | 22802 | Q15652 | SLQWFLVCIRK  | 22669 |
| Q01523 | ISGLRYLRCR   | 23010 | P27824 | RSPRNRKPRRE  | 22800 | P26718 | PNTYICMQRTV  | 22667 |
| P29590 | RGLAERASQQS  | 23008 | Q02108 | ANFLGKASGID  | 22798 | P23975 | RQFQLQHWLAI  | 22667 |
| P17026 | LWLVSVKYRAF  | 23008 | P56715 | DLESSREQEDL  | 22798 | Q13608 | YKRIQRKFAAC  | 22667 |
| P41145 | LRDIDGMNPKV  | 23007 | P55265 | QEEKNFYLCVP  | 22797 | P04424 | QVRALLQAQQA  | 22664 |
| P12107 | GFEVGPVCFGL  | 23003 | Q05524 | AGRNFRNPRIN  | 22797 | Q02241 | FLKYISCILIN  | 22662 |
| Q13705 | NVDLPPKESSI  | 23000 | P13134 | TSVTSVASACE  | 22797 | P30874 | TLLNGDLQTSI  | 22662 |
| P11940 | AVNSATGVPTV  | 22996 | O43603 | AGDSILTVDVA  | 22796 | P48595 | TILFYGRLCSP  | 22661 |
| P01718 | FGGGTKLTVLS  | 22992 | Q9Y215 | YIDSTPCRYFT  | 22795 | P41219 | SELDKSSAHSY  | 22659 |
| Q13310 | QKVGAVAAATS  | 22988 | P10176 | LSHLETYRRPE  | 22794 | P49746 | PFRRLQLQGRV  | 22658 |
| Q13258 | CSNSTNMESL   | 22988 | Q15398 | ITFSPQLPGEF  | 22791 | Q9Y6J3 | KSVLATEHAQT  | 22656 |
| P08652 | TRPLQTVPLWD  | 22987 | Q9UF02 | AASPSAVFSL   | 22790 | Q9Y5N5 | ETLSVLKFTKS  | 22656 |
| Q9NRZ7 | SYGNQEFKKKE  | 22987 | Q92597 | SAGPKSMEVSC  | 22790 | P11308 | SHMPSHLGTYY  | 22655 |
| P54687 | REESDWITVLS  | 22985 | P40939 | HANSPNKKFYQ  | 22781 | Q92685 | PKSTQHSKKAH  | 22652 |
| P33552 | FRRLPKDQKQ   | 22984 | O43920 | PHHIKGGEPRP  | 22779 | P48736 | LGIKQGEKHA   | 22652 |
| P02278 | TKAVTYTSSK   | 22979 | O00628 | IYDPACTIPA   | 22778 | P25063 | VVSLSLHLYS   | 22650 |
| P00414 | FLYVSIYWWGS  | 22975 | Q99259 | IEEIERLGQDL  | 22772 | P14598 | ESTKRKLASAV  | 22650 |
| Q9P2J9 | SESIGAYYKGG  | 22971 | O14718 | VSIGNPLASGRI | 22772 | Q14194 | PVGRSNITSLG  | 22644 |
| Q9ULP0 | GQVNHTMEVSC  | 22964 | Q16352 | IEETTISSQKI  | 22771 | P54762 | VQISQSPSTAMA | 22642 |
| Q04656 | GDFREDDTAL   | 22962 | P34995 | RSSRHSGLSHF  | 22769 | P02774 | SEIDAELKNIL  | 22642 |
| P28329 | KATRPSQGHQP  | 22962 | P24387 | NSIGEFCLSG   | 22768 | P09919 | SYRVLRLHAQP  | 22641 |

ID: ID from Uniprot Database (<http://www.uniprot.org/>) Sequence: Listed sequences match the Uniprot ID, but for the array experiments and for the computational predictions, the cysteines were changed to serine. NA: not available. BLU: biochemical light unit.

Table S1: Binding data from CAL peptide array.

| ID     | Sequence     | BLU   | ID     | Sequence     | BLU   | ID     | Sequence     | BLU   |
|--------|--------------|-------|--------|--------------|-------|--------|--------------|-------|
| P27216 | DFRKLIVALLH  | 22640 | Q14444 | GPQDPTTEGCRK | 22566 | P09493 | LDHALNDMTSI  | 22493 |
| Q13619 | KDNPNQYHYVA  | 22640 | P01178 | ACDAEATFSQR  | 22565 | P16219 | IAGHLLRSYRS  | 22492 |
| Q99576 | QVPEAPGGSAV  | 22639 | P29728 | RNFWRSSGNRF  | 22564 | P05090 | VTQVNCPLKLS  | 22491 |
| P12891 | WFLLLPYISLV  | 22639 | Q9Y2Q5 | LEELPTQVAAS  | 22564 | P13385 | VGICLSIQSY   | 22491 |
| Q9Y6M9 | YIVTRPRERPM  | 22638 | Q13153 | AAAKEATKNNH  | 22564 | P50461 | GGLTQQVEKKE  | 22491 |
| Q13393 | KEAIVPMVWVT  | 22638 | O95456 | TTNEIQSNITY  | 22562 | Q9Y3P0 | DQVAILLFKSG  | 22491 |
| P36383 | KSGDGKNSVWI  | 22637 | P49419 | DLPLAQGIKFQ  | 22561 | P11712 | PPFYQLCFIPV  | 22490 |
| P53805 | RRPEYTPIHLS  | 22636 | Q01196 | ARLEEAVWRPY  | 22559 | P80748 | GTKLTVLSQPK  | 22488 |
| P43246 | NEISRIKVT    | 22635 | Q92499 | GYLPNQLFRTF  | 22559 | Q14094 | PCPLQPVSV    | 22487 |
| Q9UGV2 | LDHRQTMEVSC  | 22635 | P52758 | AIQGPLTTASL  | 22555 | P33991 | LTVTGKTVRL   | 22485 |
| P50225 | AGCSLSFRSEL  | 22634 | P06850 | SNRKLMEIIGK  | 22554 | Q9UGL9 | NNRSSGCCSGC  | 22482 |
| P35321 | PAPAQKTKQK   | 22633 | P33260 | PPLYQLCFIPV  | 22553 | P14416 | FRKAFLLKILHC | 22481 |
| P46059 | FMSGANSQKQM  | 22633 | P24310 | YSLGWASFPRN  | 22552 | P16989 | PAPPTQSSAE   | 22481 |
| P49770 | SELYHPDDHVL  | 22632 | P03928 | ICSLHSLPPQS  | 22551 | P20073 | YRRLLLAIVGQ  | 22480 |
| Q14494 | RQERKPKDRRK  | 22632 | P36776 | DEQAEALAVR   | 22550 | P10645 | VAHQQLALRRG  | 22480 |
| P40313 | STWINQVIAYN  | 22631 | P78382 | ETASKERVIGV  | 22549 | P53621 | IGLRISPLQFR  | 22476 |
| P47989 | PENCKPWSVRV  | 22628 | P30838 | YPPSPAKMTQH  | 22549 | P48023 | ESQTFFGFLYKL | 22476 |
| P15813 | FKRQTSYQGV   | 22627 | Q00975 | SYHHDPQDHW   | 22545 | P43627 | AESRSKVVSCP  | 22476 |
| Q13454 | HGYPYSDLDFE  | 22625 | Q14008 | KRLERIKSSRK  | 22545 | Q16795 | EDVKAFTVNI   | 22476 |
| O00548 | EKDECVIATEV  | 22623 | O95665 | SGFGDPPETRT  | 22541 | O15432 | YYLAYPLLSTA  | 22474 |
| Q99062 | RVHGMEALGSF  | 22621 | Q13363 | EADRDHASDQL  | 22537 | P55291 | ALLPRHRGRTA  | 22473 |
| Q9Y5Z0 | DESSLVRHRWK  | 22620 | P53672 | GQLQSIRRVQH  | 22536 | P26717 | SSMIYHCKHKL  | 22473 |
| P16410 | KQFPYFIPIN   | 22617 | P13473 | LKHHDHAGYEQF | 22536 | Q92581 | NLLDNTRHGPA  | 22472 |
| Q9P286 | IVPLMRQYRHH  | 22617 | P20585 | NMEETQTSLH   | 22536 | P33681 | ERLRRESVRPV  | 22471 |
| P02462 | VSRQCVMRRRT  | 22614 | Q02487 | FRTLAEACMKR  | 22535 | O00622 | RLFNDIHKFRD  | 22469 |
| P25103 | ESFSFSSNVLS  | 22614 | O60832 | KKAKEVELVSE  | 22534 | Q01459 | WEVLKPKLLQR  | 22469 |
| Q16718 | EPPADQWKWPI  | 22613 | P51513 | GVRAANPQKVG  | 22534 | P22004 | RNMVVRACGCH  | 22467 |
| P02765 | PCPGRIRHFKV  | 22611 | Q9U115 | FLSSSGPRVSV  | 22534 | O60806 | GGHSHSPSSLDG | 22467 |
| P30084 | VEKRKANFKDQ  | 22610 | Q06330 | SVTSSSTATVVS | 22534 | O14874 | HIDGREESFRI  | 22466 |
| P13591 | ATQTKENESKA  | 22609 | P33765 | SLDTSIEKNSE  | 22532 | P29798 | FREKKFFFCALL | 22466 |
| P42336 | IFHTIKQHALN  | 22609 | P30414 | HRSPSESSRYS  | 22532 | Q14138 | VWVFRLYPSTS  | 22465 |
| Q92824 | QLCCKTCTFQG  | 22609 | Q02338 | PGAISDMYIR   | 22531 | P01138 | CVLSRKAVRRA  | 22458 |
| Q13126 | MAQFSVLLPRH  | 22608 | Q14451 | LLRHCCTRVAL  | 22531 | Q02153 | TGTEETKQDDD  | 22457 |
| P48764 | PPAALPESTHM  | 22607 | P50851 | QAVRLLLLGPF  | 22530 | P34130 | VCTLLSRTGRA  | 22457 |
| O75936 | RILRQRVENGN  | 22605 | Q00872 | ECKLEVKVIAQ  | 22530 | P48740 | DWQIRVTGVNR  | 22456 |
| P15088 | FIKYLKHTS    | 22605 | Q99784 | TLFHVIRSDLE  | 22530 | O96009 | WGETAQAFQPG  | 22456 |
| P48050 | DNISYRRESAI  | 22605 | P48539 | KFQKKKAGSQS  | 22529 | Q14500 | EQRPRYRESEI  | 22455 |
| P51589 | VSHRLCAVPQV  | 22604 | O95406 | LYGMIYVLVSS  | 22528 | P25440 | SSSDTSDSDSG  | 22454 |
| Q14833 | QTYVVTYNHAI  | 22604 | Q16850 | NPVIRYKRRSK  | 22528 | P16435 | TKGRYSLDVWS  | 22453 |
| Q9Y618 | CSQYETLSDSE  | 22604 | P29762 | DVVCTRYVRE   | 22528 | P49023 | YCQNCPLKFLC  | 22453 |
| O95298 | GEIFEKFPPIR  | 22603 | Q05193 | RPESRPPFDL   | 22527 | Q99683 | KAIDFRNKQT   | 22452 |
| Q16832 | IHLLLQCGDE   | 22602 | P06888 | FGGGTNTVTVG  | 22526 | P03915 | FPLILTLTLLIT | 22451 |
| P49005 | DDDLGLGGLGP  | 22602 | P56555 | RDQKISASPST  | 22525 | P57073 | DQPVYTLTRP   | 22451 |
| Q16610 | NISSTSEPKLE  | 22602 | Q14978 | VQVNSIKFDSE  | 22525 | P26232 | KKHIFACTGFK  | 22445 |
| Q9UBI6 | PFKDKKTCIIL  | 22602 | Q15763 | YCIVSAFGLSI  | 22523 | P20929 | AMEIIEKPEF   | 22443 |
| Q9UHP9 | SELKYVPKAEQ  | 22602 | P10997 | LKREPLNYLPL  | 22523 | P55290 | LLSLVFLSLACI | 22440 |
| Q05516 | IEKTYLYLCYV  | 22602 | O15151 | IEIQLVKVFIA  | 22523 | Q9NYC9 | VLAVGALLLQI  | 22439 |
| Q02246 | AMLILIGSLEL  | 22601 | Q16612 | RSRISYLFHFF  | 22523 | P32247 | GCSVKQAEDRF  | 22437 |
| P13674 | FRPCTRSELE   | 22601 | Q9Y6M5 | NMPNKPPESSL  | 22523 | P43005 | DTISFTQTSQF  | 22437 |
| O95484 | GASGLDKRDYV  | 22600 | P53999 | ISDIDDAVRKL  | 22522 | P56385 | RELAEDDSILK  | 22436 |
| P17039 | SGSYLVQHQR   | 22599 | Q16527 | QGAGALVHAQ   | 22520 | P42330 | SHPNYPYSDY   | 22436 |
| P54252 | IMFATFVLYLT  | 22598 | P18669 | EAVAAQKAKK   | 22518 | P36610 | VQALSVDGLV   | 22435 |
| P14061 | PELGDPPAAPQ  | 22597 | P24311 | GRVTPKEWRNQ  | 22515 | Q02297 | SVIANQDPIAV  | 22435 |
| O15255 | SPPPGTCVLA   | 22596 | Q02928 | LPNCPEDKDQL  | 22515 | P56181 | QPSSGRESRPH  | 22435 |
| P42126 | MYLERLKKEEG  | 22594 | Q9Y5S8 | KVQFYFNKENF  | 22515 | O43741 | KYVTTLLYKPI  | 22433 |
| Q16698 | IEELIRKTKGS  | 22594 | P16499 | GATTSKSCCIQ  | 22514 | P15036 | AILGVQPDTE   | 22433 |
| Q02218 | AAPATGNKKTH  | 22594 | P51864 | AGICLSIQSY   | 22513 | Q13415 | QDDVLYALKDE  | 22432 |
| P01732 | GDKPSSLARYV  | 22592 | O94760 | CSVLINKKVDS  | 22513 | P54750 | TSSQKCEFIHQ  | 22431 |
| P56282 | KTVEDSKLQGF  | 22592 | P56545 | HGDNREHPNEQ  | 22512 | P08034 | LAEKSDRCSAC  | 22430 |
| P47883 | GGLSPNSHSL   | 22592 | Q13685 | AKVFCVQRPDR  | 22511 | Q14542 | ASLSFLFKALL  | 22430 |
| P20264 | PPHHGLQTSVG  | 22590 | Q99758 | HLQPPTAEGR   | 22511 | P14921 | AMLDVKPDAD   | 22430 |
| Q9UBM4 | CLPRLPIGRFT  | 22590 | Q99966 | FDFTADFPSSC  | 22511 | O43913 | FDIUKLYDFL   | 22430 |
| P98187 | DGLWLRVEPLG  | 22588 | O75251 | RERRLLQIYRR  | 22511 | P31645 | IPCGDIRLNAV  | 22429 |
| P02792 | YLFERLTCLKH  | 22588 | P30301 | GEPVELNTQAL  | 22508 | P13686 | FKTRLPRRRAR  | 22429 |
| Q9UBD5 | DHVARLTWGGC  | 22586 | P36957 | VEDPRVLLLDL  | 22508 | P41252 | YVSVLPTTADF  | 22429 |
| P28221 | FQKIVPFRKAS  | 22585 | P07315 | AGSLRRVVDLY  | 22507 | P14854 | QRAEGTFPGKI  | 22428 |
| P04798 | CCEHFQMQRLS  | 22585 | Q13416 | TDFLEKEEEEA  | 22507 | P53602 | LGPDGLPKPAA  | 22428 |
| O00337 | CRFYNHITCAQ  | 22584 | O00151 | EGYEVVTVFPK  | 22507 | Q95258 | ITYEQLKRLQI  | 22427 |
| O75828 | QLVHDKVQVQNW | 22584 | P43116 | TQSDASKQADL  | 22507 | Q9UBP0 | RWNKDFDGTTV  | 22427 |
| P01133 | LDPHQMELTQ   | 22584 | P15848 | PKATGVWGPWM  | 22506 | Q9UNQ0 | YLKLLFLKKYS  | 22426 |
| Q14764 | PRGACTALTPD  | 22584 | Q9UBY0 | SRKARFGSEKP  | 22506 | P14859 | ASTTTTASKAQ  | 22426 |
| Q9UM60 | VMAAMYTVVTP  | 22583 | P55769 | SIQQSIERLLV  | 22506 | P04220 | LVMSDITAGTCY | 22425 |
| Q9UMR2 | DDLDEIEKIAN  | 22582 | P23786 | FDALLEGKSIKS | 22505 | P15086 | YVASVYLEHLY  | 22424 |
| P51397 | PRTQHIQCPKPK | 22581 | Q92841 | PPPPPPPPSRK  | 22505 | Q14318 | VALSVVIAARN  | 22424 |
| P30989 | LSSNATRETRY  | 22581 | P56856 | VQSYPSKHDYV  | 22504 | P50281 | LYCQSRSLDKV  | 22424 |
| P07148 | DIVFKRISKRI  | 22580 | O95182 | RWELSSDQPYL  | 22504 | P57076 | HGVKDIKWRPR  | 22423 |
| P20592 | ALCFSSKEIH   | 22580 | Q13014 | GQFVVRVRFKS  | 22503 | P11279 | KRKRSHAGYQTI | 22422 |
| O00329 | LAHNVSKDNRQ  | 22580 | Q14197 | AVKTSRRVDM   | 22502 | P54710 | KRRRQINEDEP  | 22421 |
| Q16549 | DVPHGKEEQIC  | 22580 | O96013 | IVPLMRQNRTR  | 22500 | O43181 | SWNKRTRVSTK  | 22420 |
| P55283 | LADMYGGGEED  | 22578 | Q00526 | ARQYVLRFRH   | 22499 | P35869 | FPDLTSSGFL   | 22418 |
| Q13114 | VIVDTSDLDPD  | 22577 | Q12860 | PAFGILVYLEF  | 22498 | P46663 | RKEIFQLFWRN  | 22417 |
| O96002 | PRTYLYVWPYK  | 22575 | P01588 | YTGEACRTGDR  | 22497 | P09172 | PTVVSIGGGKG  | 22416 |
| P76093 | RSRRIRPTHPA  | 22572 | Q92871 | EIFFPPTAHEA  | 22497 | Q12841 | EKTKRVSTKEI  | 22416 |
| P23409 | KLPCVEVVEVE  | 22571 | P53004 | EEIQYCCSRK   | 22496 | O15305 | DTRICELLS    | 22416 |
| Q13625 | PRIKRQGRSLA  | 22570 | P16220 | ALKDLYCHKSD  | 22496 | P11177 | IIFAIKKTLNI  | 22415 |
| P01189 | AIKNAYKKGE   | 22569 | P04181 | IEIINKTILSF  | 22496 | P17707 | SFAKKQQQQQS  | 22413 |
| P21964 | IYKGPGEAAGP  | 22567 | Q99742 | PAGTRLPRKGD  | 22495 | P04626 | NPEYGLDVPV   | 22413 |
| P48165 | SSRARSDDLTV  | 22566 | Q9UP62 | VASVFYTVVIP  | 22495 | P29033 | RYCSGSKKPKV  | 22412 |

**ID:** ID from Uniprot Database (<http://www.uniprot.org/>) **Sequence:** Listed sequences match the Uniprot ID, but for the array experiments and for the computational predictions, the cysteines were changed to serine. **NA:** not available. **BLU:** biochemical light unit.

Table S1: Binding data from CAL peptide array.

| ID     | Sequence     | BLU   | ID     | Sequence     | BLU   | ID     | Sequence     | BLU   |
|--------|--------------|-------|--------|--------------|-------|--------|--------------|-------|
| P53673 | FQVQSIRRIQQ  | 22411 | Q14681 | AKILQERGSRM  | 22359 | P80365 | LSPGSPSPAVAR | 22318 |
| Q9Y5R6 | FTVTPVIEEDE  | 22411 | O75712 | LQASAPNLTP   | 22357 | P80297 | KGTSDKSCSCCA | 22318 |
| P06746 | WKYREPKDRSE  | 22410 | P11423 | ETPCYITGWGR  | 22357 | P14222 | EPPGNRSGAVW  | 22318 |
| Q13145 | MYSGHGKLEFV  | 22410 | P23280 | EILDYLRRLN   | 22356 | O60635 | IVSMYLYCNLQ  | 22318 |
| Q14943 | PAGNRSEQRGF  | 22409 | P11479 | IYQGRLLWAFCC | 22356 | Q13639 | SPLVAAQPSDT  | 22317 |
| P56749 | EIDIPVVSHTT  | 22407 | O94778 | DGKTRLILKAR  | 22355 | P51685 | SSRSSSVDYIL  | 22317 |
| Q9U125 | FGPEVVAPQRL  | 22407 | O15182 | EEFIAIMTGDI  | 22355 | O43708 | RQPDTPTELRA  | 22317 |
| P04920 | VDEYNEMPMV   | 22406 | Q08752 | KEKAVYAKMFA  | 22355 | P01854 | VQRAVSVNPGK  | 22316 |
| O95500 | THSGYRLNDYV  | 22406 | Q9Y5X4 | MEKLLCDMFKN  | 22355 | Q14574 | FITLAEACTKR  | 22315 |
| P45877 | KTPFVVEIADW  | 22406 | Q13316 | DQDDNDQCQDGY | 22354 | P19883 | YSFPISILEW   | 22314 |
| P31276 | SKSKAPHLHST  | 22406 | P32519 | KQNELLEPNF   | 22354 | P55286 | LYSVGESDKET  | 22313 |
| Q15700 | PFIWIPSKLEK  | 22405 | Q9NQX5 | LPAPSPPPALP  | 22354 | P21926 | CCAIRNRNEMV  | 22313 |
| P49639 | SSTDTLTTHSH  | 22405 | P22736 | IDKIFMDTLFP  | 22354 | P42773 | ANGAGGATNLQ  | 22313 |
| P14209 | EPAVQRTLLEK  | 22405 | Q11203 | ARVITDLSSGI  | 22352 | Q05923 | LLQFETQVLCH  | 22313 |
| Q14432 | GEEIPTQKPDQ  | 22404 | P08138 | LCSESTATSPV  | 22351 | Q99808 | AVFSFLFRAIV  | 22312 |
| O76082 | ERTITLKSHTAF | 22404 | Q9UKP4 | LCPRPAGRVHG  | 22350 | P55957 | YVRSLARNGMD  | 22311 |
| P00167 | ALMYRLYMAED  | 22403 | P27487 | SHFIKQCFSLP  | 22350 | P43166 | KGRVVKASFRA  | 22311 |
| O60711 | CQPCFNKLFPL  | 22403 | P55075 | GSQRTWAPEPR  | 22350 | P50570 | IIRPAEPLSLD  | 22311 |
| P29120 | QALVDILNEEN  | 22403 | P17844 | IGYPMPTGYSQ  | 22349 | P23610 | LHLVLQETISP  | 22311 |
| P47874 | NLKASVVFENQL | 22402 | P29965 | TGTFSTFGLLKL | 22349 | P16442 | VPKNHQAVRNP  | 22310 |
| P00748 | YLAWIREHTVS  | 22400 | Q16619 | DLGLLLPGGSA  | 22348 | P32391 | CRHNPVFGVMS  | 22309 |
| Q13891 | NMFTNQATVIR  | 22399 | P05092 | KITADCGGLE   | 22347 | O95158 | YNFQSEHPYFG  | 22309 |
| P42338 | MAHTVRKDYRS  | 22399 | Q02750 | QPSTPTHAAGV  | 22347 | P51689 | CSCHEDGDGTP  | 22308 |
| O95954 | LVLDCLETRQE  | 22398 | Q13621 | GNHKNVLTFFYS | 22347 | P30098 | SSSHMSVEEGS  | 22308 |
| Q16617 | CGGPRPGYETL  | 22396 | P46109 | IFNDPQNPDENE | 22346 | Q01850 | RTKYRSLSSH   | 22308 |
| P51970 | THGSRFYFWTK  | 22396 | P16152 | QFVSEKRVQEW  | 22346 | P01213 | PNAYSGELFDA  | 22307 |
| Q08289 | RKPRRVEITLPT | 22395 | P51114 | TQEAASVNLGVS | 22346 | O95157 | YHSDTPYYPSPG | 22307 |
| P21452 | LLAPTCKTHVEI | 22395 | P34059 | ESIPKCLWVSH  | 22346 | P52907 | SYKIGKEMQNA  | 22306 |
| Q99743 | SESSGLQKPPR  | 22395 | P46087 | KFNTLHFKTSGH | 22346 | P54098 | GSLEKRSQPGP  | 22306 |
| P46734 | AFVKKILGEDS  | 22392 | Q16678 | VQNLLQAKETCQ | 22345 | O00154 | AKRQGHAEPPQ  | 22305 |
| P40199 | TIGVLARVALI  | 22392 | P20916 | ELAEYAEIRVK  | 22345 | P07320 | VGSLRRVIDFS  | 22304 |
| Q9UJV9 | KDYLAHSSMDF  | 22390 | P08493 | NRYFRKRRGAK  | 22345 | Q07814 | DVYNAFSLRV   | 22303 |
| P03989 | TVPRALMCLSQ  | 22389 | P38432 | SPSNTSSTEP   | 22345 | P48745 | ELELKTTRGKM  | 22303 |
| P46527 | PKKPGLRRRQT  | 22389 | P49753 | GGREGTIPSKV  | 22345 | P31146 | LDRLEETVQAK  | 22302 |
| P21728 | QPITQNGQHPT  | 22389 | P16278 | QKKNKDSWLDHV | 22344 | P49137 | ARALEAAALAH  | 22302 |
| P47884 | GRVLWRFPQRP  | 22389 | P53567 | NTADGDNDAGQ  | 22344 | P22033 | EKCLEKKQQSV  | 22302 |
| P14091 | NNRVGLAPAVP  | 22388 | Q9NYV4 | PRGGGRGVVPY  | 22344 | Q9Y2T1 | GRILGKVERID  | 22301 |
| Q04760 | ILNPNKMATLM  | 22388 | P56278 | QELLLKLLPDD  | 22344 | P19801 | PFSYNGTYRPV  | 22300 |
| Q13405 | ELKAWLLEKGF  | 22388 | Q13823 | KHKRKKFRQKQ  | 22344 | P01037 | RSLVKSRQCES  | 22300 |
| P54845 | PGSGDPSHLFL  | 22388 | P00367 | KVYNEAGVTFT  | 22343 | P01772 | WGQGTPTVTSS  | 22300 |
| P57679 | SKKMLKRRSNL  | 22387 | P26715 | SSHIYHCKHKL  | 22343 | P13535 | SREVHTKISAE  | 22300 |
| Q01959 | RQFTLRHWLKV  | 22387 | P35270 | KSGAHVDFYDK  | 22343 | P51946 | EWTDLDDLVESL | 22299 |
| P21145 | AVFSLIRWKS   | 22386 | O75914 | AAKEAIKNSSR  | 22342 | P23284 | EVEKPFIAIAKE | 22299 |
| Q9Y236 | FVERGGGDGIA  | 22385 | P16885 | SSCTRRNATRG  | 22342 | Q9UHI6 | IYLQEMMHSNQ  | 22299 |
| P18146 | ATFSPRTIEIC  | 22384 | P25232 | RGRTVGVSCKK  | 22341 | O60683 | PQKLIYLRHYR  | 22299 |
| P48728 | PFVPTNYYTLK  | 22384 | P16260 | YELMKQFFHLN  | 22340 | O60423 | SFWLFRMPTSA  | 22298 |
| O95644 | RNDLSSTSTHS  | 22383 | P14621 | KLEYSNFSIRY  | 22339 | P43251 | AALYGRLYERD  | 22297 |
| O15075 | SETVRSNPSNF  | 22382 | P17661 | SEATQQQHEVL  | 22338 | O15296 | DPPLIENSIVI  | 22297 |
| Q92796 | HYIWWPSPEKL  | 22382 | P49448 | KVYSEAGVTFT  | 22338 | Q04900 | HTRNYIPDLKK  | 22297 |
| P25713 | EAAEAKCSCCQ  | 22382 | P19634 | GEGEPFFPKGQ  | 22337 | P37059 | LRMPNYKKKAT  | 22296 |
| Q15332 | TVHRQPSHFPR  | 22381 | P19235 | EPLPPSYVACS  | 22335 | P28340 | RRFGPPGPEAW  | 22296 |
| Q13206 | ELVLHLRSQS   | 22381 | O43900 | RQARDKNCIVA  | 22335 | Q04743 | SPEEDVTSDD   | 22296 |
| O60242 | DVQEGDFQTEV  | 22380 | Q16658 | ETVDNPASLWEY | 22334 | Q9NPA2 | LPLLVGGVASR  | 22296 |
| P35613 | KGKNVRQRNSS  | 22380 | P48751 | QDEYNELHMPV  | 22332 | P43628 | IVYTELPNAEP  | 22296 |
| P27482 | YEEFVRLVSK   | 22380 | P28476 | FFNLIYWSVFS  | 22332 | Q14246 | LSSMPSASKTG  | 22295 |
| P55268 | NLQVQYNTCCQ  | 22380 | P49959 | MNTSSLRRNRR  | 22332 | P16519 | ERSLKSILNKN  | 22295 |
| P49116 | EYNGQITGASL  | 22380 | Q07108 | NLYWICNKPYK  | 22331 | Q13615 | GQQKEFGVGVI  | 22294 |
| Q07973 | SRELPIAFCCR  | 22379 | P02144 | ASNYKELGFQ   | 22331 | O14576 | SEEGTVELSA   | 22293 |
| P55083 | LKRTEMKIRRA  | 22379 | P54707 | PGSWWDKNMYY  | 22330 | P35580 | DVNETQPPQSE  | 22293 |
| O43174 | PARFTHFHGEI  | 22378 | Q92874 | FPVEVTLKFHR  | 22330 | P21397 | VLYKYKLLPRS  | 22292 |
| P46379 | PNARAFADDDP  | 22377 | Q16706 | MEISTFRIQLR  | 22330 | Q07864 | WLLQKNPQLGH  | 22292 |
| P00742 | APVEITSSPLK  | 22377 | P55056 | PRLVCGDKDQ   | 22329 | O14641 | GNPSEFFVDVM  | 22292 |
| Q9Y2A7 | AVYKQSVTSSA  | 22376 | P48681 | GDREWSWGED   | 22329 | P14625 | AKESTAELDEL  | 22292 |
| P05323 | HVTRRTPDYFL  | 22376 | O43678 | RALENVLSGKA  | 22329 | P51511 | LYCKRSLQEWV  | 22292 |
| P98173 | EGCIPRRSTAS  | 22375 | P07316 | VGSLRRVMDLY  | 22328 | P03971 | PNMVATECGCR  | 22291 |
| O43852 | FGEALVRHDEF  | 22375 | P18282 | SLIVAFEGCPV  | 22328 | Q13203 | CRLEVKASAAH  | 22291 |
| P41143 | PSDGPGGGAAA  | 22375 | P14174 | ANVGWNNSTFA  | 22328 | O43583 | DSIEDLGEVKK  | 22290 |
| Q06430 | SETAIQPSWYF  | 22374 | P31641 | KPTHIVETMM   | 22328 | P81272 | TAYSCLPKPK   | 22290 |
| P31513 | ILLIAVFLVLT  | 22374 | P02747 | SVFSGFLLPD   | 22327 | P09466 | DLKQMEEFPCRF | 22290 |
| P78559 | DESFPACKIEF  | 22374 | P12830 | LADMYGGGEDD  | 22326 | Q08495 | RNELKKKASLF  | 22289 |
| P02730 | RDEYDEVAMPV  | 22373 | P10632 | PPSYQICFIPV  | 22326 | P00451 | EVLGCEAQDLY  | 22289 |
| P78352 | PYIWWPARERL  | 22373 | Q14031 | VSRCQVCMKSL  | 22325 | Q92686 | RGGAGGGPSGD  | 22289 |
| P18509 | VKNKGRRRIAYL | 22373 | P04114 | KLAPGELTIIL  | 22323 | Q13291 | TVYASVTLPE   | 22289 |
| P32856 | IVLIIGLSVGK  | 22369 | P54259 | SHLKKESDKPL  | 22323 | P15289 | PACCHCPDPHA  | 22288 |
| Q06455 | GTPSTIETTPR  | 22369 | P29371 | SPYTSVDKES   | 22323 | O00305 | GGYSHDSRHRL  | 22288 |
| O75489 | LEAGDKKPKDAK | 22369 | Q9Y678 | LPVDIILASVG  | 22322 | P09131 | HFIYSSLPFVP  | 22288 |
| Q13698 | GSQETLIPRL   | 22367 | P05093 | AWREAQAEGST  | 22322 | P49711 | TPMILSMMDR   | 22287 |
| P48066 | IAAITEKETHF  | 22367 | P34820 | RNMVVKACGCH  | 22321 | P54368 | FERESSGEEEE  | 22287 |
| P08581 | DTRPASFWETS  | 22366 | P02593 | YEEFVQMMTAK  | 22321 | P35609 | FSSALYGESDL  | 22286 |
| P10243 | ATSSTSRALIL  | 22366 | P51648 | VAASVLKAEYY  | 22321 | P49335 | TVKTDTSCHDL  | 22286 |
| P17302 | SSRPRPDDLEI  | 22365 | Q15761 | DLVSLIHCMLH  | 22321 | O75881 | SDVLFYRYKVK  | 22286 |
| Q16643 | PTEEEGFEGGD  | 22365 | Q01968 | LLGFLLGSEED  | 22321 | P35221 | ALSEFKAMDSI  | 22286 |
| Q08554 | FRTLAKTCIKK  | 22365 | P55000 | CCFRDLNSEL   | 22320 | P55011 | GNHQSVLTFFYS | 22286 |
| P32889 | DWLSNQLNRNQK | 22364 | Q13873 | MVSKDIGMNCL  | 22320 | P08206 | FVVHMKQKGGK  | 22286 |
| P09884 | SKLFAAGCAVKS | 22361 | O14936 | APQWVPVSWVY  | 22320 | Q92542 | IAPREPAGVSY  | 22285 |
| Q14126 | TKHSTQVSHYS  | 22361 | Q9Y6H8 | SGRARPEDLAI  | 22319 | P10643 | TSIRPCAETQ   | 22284 |
| P18078 | MASLQMAGNPG  | 22361 | P52895 | GPPNYPISDEY  | 22319 | O60584 | SCFSPYSFVSV  | 22284 |
| Q09013 | VWRRPGAARAP  | 22360 | P28356 | KMSKEKCPKGD  | 22319 | O15303 | PPKGEDAEAHK  | 22283 |

ID: ID from Uniprot Database (<http://www.uniprot.org/>) Sequence: Listed sequences match the Uniprot ID, but for the array experiments and for the computational predictions, the cysteines were changed to serine. NA: not available. BLU: biochemical light unit.

Table S1: Binding data from CAL peptide array.

| ID     | Sequence     | BLU   | ID     | Sequence     | BLU   | ID     | Sequence     | BLU   |
|--------|--------------|-------|--------|--------------|-------|--------|--------------|-------|
| P55055 | PLLSIWDVHE   | 22283 | Q99440 | VSGAHSTAVHQ  | 22254 | Q13618 | PEDRKVYTYVA  | 22222 |
| P30049 | EANEALVKALE  | 22282 | P49901 | HSPQNESRPSK  | 22254 | P21917 | NVFRKALRACC  | 22222 |
| P10768 | HIRHHAKYLN   | 22282 | Q13409 | AEEEEATRIPA  | 22252 | P16050 | RPSVVENSVAI  | 22222 |
| P41162 | EGLAIRNASLT  | 22282 | O95704 | FRLKPSLLHMP  | 22251 | P41227 | KDSSEASDSAS  | 22221 |
| Q10567 | VYQAYETILKN  | 22281 | P40121 | PIFKQFFKDWK  | 22251 | P04141 | IPFDCWEPVQE  | 22221 |
| P10415 | CITLGAYLGHK  | 22281 | P98082 | MYRDPFGNPFA  | 22251 | P57721 | LTSEVTGMGT   | 22221 |
| Q99615 | SGPGNFFQFG   | 22281 | Q9Y4Y9 | MLVPGGEGPEV  | 22251 | O96008 | KFQCGFGLTIG  | 22220 |
| O14579 | DRLVLQYAPSA  | 22280 | O00462 | SFHVTSLTDIY  | 22251 | O43612 | ASVAPGGQSGI  | 22220 |
| O43868 | CCGFYNNTVCA  | 22279 | P16444 | LAPLVLCLSLL  | 22251 | Q9UBX1 | VNTMASSAVVD  | 22219 |
| P47889 | AVGIFNTVINP  | 22279 | P36871 | RTGRTAPTIVT  | 22251 | P23528 | SAVISLEGKPL  | 22218 |
| Q02410 | LLTAQEQPVYI  | 22278 | O15068 | ELVQEGDEGLW  | 22249 | O60879 | RSRHNGAISK   | 22218 |
| Q16878 | PNATSGSLENN  | 22278 | O95190 | YPLDQNLSD    | 22249 | Q15701 | GQVAILLFKSG  | 22218 |
| O60344 | PMNPGQLCEVW  | 22278 | P36542 | IEHSGAAALD   | 22248 | Q13183 | PSLANTTTPSP  | 22218 |
| O75891 | YLRVKTVTFFEY | 22278 | P20248 | SLNPPETLNL   | 22247 | O75380 | YCGLQFRQHHH  | 22218 |
| P18054 | KPSCIENSVTI  | 22278 | O14983 | YLEDPEDEERRK | 22246 | O15527 | KRRKSGSKGPEG | 22218 |
| O43861 | LSPPSYCKLAS  | 22277 | P17544 | IMTPQSQSAGR  | 22246 | O60629 | ESAHDPGVVGT  | 22217 |
| Q00765 | VNLLGEEKKST  | 22277 | Q15800 | EKRKKKFEKTE  | 22246 | O43405 | GICRDFLESQQ  | 22217 |
| Q15363 | LKRFFEVRRVV  | 22277 | P31512 | MSPYLVSLWRG  | 22246 | P33908 | KDKKEVEIREE  | 22216 |
| P05813 | SQIQSIRRIQQ  | 22276 | P04431 | TFGQGTRLEIK  | 22246 | P04080 | NKAKHDELTYF  | 22215 |
| P19113 | QLPCCPLQAMV  | 22276 | Q9Y6K9 | TLQIHVMECIE  | 22246 | P35573 | IATILETLIDL  | 22215 |
| P02794 | KHTLGDSDNES  | 22276 | P08235 | GNAKPLYFHRK  | 22245 | Q13098 | ANSQSRMSTNM  | 22215 |
| P16150 | DEPEGDGGAAP  | 22276 | Q9U109 | QEWWPPSTPYK  | 22245 | Q14324 | AECKLEVRVPQ  | 22214 |
| P01121 | QNGCINCKVL   | 22276 | Q13892 | EEVTGSCYFLL  | 22244 | Q16236 | PKSKKPDVKKK  | 22214 |
| P48634 | GDKPEGLPPPR  | 22275 | P01880 | EVSYVTDHGM   | 22244 | O43524 | KQASSQSWVPG  | 22213 |
| O75363 | PVSGIPVGKPK  | 22275 | O60663 | LYSMQSSYFAS  | 22244 | P01708 | FGTGTKVIVLG  | 22213 |
| O15374 | PLAERWKNLSLT | 22275 | P46934 | IENTQGFQDGD  | 22244 | O15457 | RTEQVPEKTEE  | 22213 |
| Q99884 | REIAEEESMM   | 22275 | P01127 | DKTALKETLGA  | 22244 | Q13402 | MSKQRGSRSGK  | 22213 |
| Q9P0J1 | HVVGAYQNQEK  | 22274 | Q13627 | VCVQSPVASS   | 22243 | P09871 | TMQENSTPRED  | 22212 |
| P26196 | YHSEPVDEDEK  | 22273 | Q02818 | RLPEVEVPQHL  | 22243 | Q16875 | SRSSADSRKHK  | 22212 |
| P35556 | ALRMRLQQLY   | 22273 | Q13561 | SIDERMKKLGK  | 22240 | P42702 | FTNFFQNKPN   | 22212 |
| P13995 | LKSKELGVATN  | 22273 | Q92633 | AGVHSNDHSHV  | 22239 | P09917 | SPDRIPNSVAI  | 22212 |
| P46531 | FLSGEFSQADV  | 22273 | Q9Y216 | CFVNLFSVLIS  | 22239 | P52961 | VRAFPDGPGLL  | 22212 |
| Q15582 | VYQKLLERMKH  | 22272 | O43847 | QQHSTFSPTIK  | 22239 | P09086 | GLWWNPAPYQP  | 22212 |
| Q15744 | ANLKGVGCGCS  | 22272 | Q93084 | RNHMHHEMSQK  | 22238 | P23490 | QQKQAPTWPSP  | 22211 |
| P07359 | TVSIRYSGHSL  | 22272 | Q13890 | SIDHKPVLQMV  | 22238 | P48645 | PRNGRRSAGFI  | 22211 |
| P32121 | MKDDDDYDDQLC | 22271 | P29279 | LYYRKMYGDM   | 22238 | P35606 | DINLDEILD    | 22210 |
| P15559 | IPTDNQIKARK  | 22271 | Q9NYJ7 | FPYPSSILSVK  | 22238 | Q13421 | VLALLASTLA   | 22210 |
| O15118 | KGTERERLLNF  | 22271 | P47944 | KGGSDDKSCCP  | 22238 | O95167 | QGPSLEWLKKL  | 22210 |
| P16581 | DGSYQKPSYIL  | 22270 | P18089 | ILCRPWTQTAW  | 22237 | P25705 | IVTNFLAGFEA  | 22209 |
| P35659 | FIKTTVKELIS  | 22269 | O60883 | SPPLPLGTGTPC | 22237 | O15197 | QHLRQQGSVEV  | 22209 |
| O15375 | KQTALGWNSPT  | 22269 | P24522 | QWVPVINLPER  | 22237 | P20591 | QARRRLAQFPG  | 22209 |
| O94916 | QNQGNLTGSGF  | 22269 | Q13939 | AKLPCKILQRI  | 22236 | Q9Y2N3 | LQARRQHTRKK  | 22209 |
| O95169 | KEPERVYHIEI  | 22269 | Q13155 | APFNTALKLLK  | 22236 | Q99457 | GKHYGNKKYRK  | 22209 |
| P28566 | FKKLIRCREHT  | 22268 | P03905 | LNPDIITGFSS  | 22236 | Q9Y585 | LQKLFSKRIS   | 22209 |
| P16587 | DWLANQLKNKK  | 22268 | P48039 | TNNNVVKVDSV  | 22235 | Q99767 | LLTGQETPLYI  | 22208 |
| O14640 | GNPCEFFVDIM  | 22268 | Q13323 | LLSGGLHLLK   | 22234 | Q16558 | NQYLSILAAQK  | 22208 |
| O15243 | GRGDDFSWEQW  | 22268 | Q15059 | SGSSDDSSDSE  | 22234 | P41214 | FSCPEDDNDWT  | 22208 |
| P26441 | GSYIANNKKM   | 22267 | P40879 | RVYEVVPVETKF | 22234 | P46821 | DESFPACKIEL  | 22208 |
| P50416 | TLFGLSSNKAK  | 22267 | P00488 | LDVQIQRRPSM  | 22234 | P40925 | KESAFEFLLSA  | 22208 |
| Q13616 | DGEKDTYSYLA  | 22267 | P80188 | FPVPIDQCIDG  | 22234 | Q15019 | DGDGGALGHHV  | 22208 |
| P36575 | KAVEAEGDEGS  | 22266 | O96014 | CERTVERYVCK  | 22234 | Q15678 | LIQFLQNSRLI  | 22208 |
| P22003 | RNMVVRSCGCH  | 22266 | O94973 | QRLCELLSAQF  | 22233 | P15924 | SYSFSSSSIGH  | 22207 |
| Q14123 | IQNISHNNWRK  | 22266 | P07858 | IPRTDQYWEKI  | 22233 | P20794 | QPPYTDYVSTR  | 22207 |
| P02795 | KGASDDKSCCA  | 22266 | P10747 | APPRDFAAYRS  | 22233 | P21359 | SFKRNSIKKIV  | 22207 |
| P21554 | SVSTDSAEAL   | 22265 | Q9NPJ1 | LDLSYVIEDKN  | 22233 | P52594 | PTGSSSTNPF   | 22207 |
| P16870 | WWKMMSETLNF  | 22265 | Q16515 | TTLGTLEEIAC  | 22232 | Q10472 | LLRNVTLPFIF  | 22207 |
| P28907 | NPEDSSCTSEI  | 22265 | O14786 | KLNTQSTYSEA  | 22232 | P39188 | WDYRREP RPRA | 22206 |
| P80370 | TFSKEAGDEEI  | 22265 | P11216 | LQIPPPNIPRD  | 22232 | O43822 | LRGEEVQEHA   | 22206 |
| O00754 | LASVQWKEVDG  | 22265 | O60479 | PGPPPNPGAVY  | 22231 | P04733 | KGASEKSCCD   | 22206 |
| P11137 | DVTAALAKQGL  | 22265 | Q99501 | LAPGGSDPAGG  | 22231 | Q01538 | SIKQAVRGIVQ  | 22206 |
| P54821 | SLQRNQVPTVN  | 22265 | Q99748 | HELSARECACV  | 22231 | P19474 | LNIGSQGSTDY  | 22206 |
| P56693 | EQPVYTTLSRP  | 22265 | P26842 | DYRKPEPACSP  | 22230 | O15169 | EKIGKVEKVD   | 22205 |
| Q9Y600 | LNELERLGQDL  | 22264 | Q9NRM1 | DQVQDCLLLQA  | 22230 | P56945 | FRRLVGLQAAA  | 22205 |
| O95214 | GSKDDFSWQQW  | 22264 | P56470 | QGDVTLTVYQI  | 22230 | Q9Y3R5 | IEYDFLEHPEC  | 22205 |
| O60462 | KMNHQKCCSEA  | 22264 | P03897 | EWLQKGLDWTE  | 22230 | P15502 | CLGKACGRKRK  | 22205 |
| P25929 | KINNNDNEKI   | 22264 | P78562 | MNRGMDSCRLW  | 22229 | O75376 | QAYETLSDSD   | 22205 |
| O95248 | WDFYTEETLAE  | 22263 | P10523 | EGKRDKNDADE  | 22228 | O00170 | DKARFRGIFSH  | 22204 |
| P56975 | NEIQDTSALTK  | 22263 | P21860 | RLFPKANAQRT  | 22228 | P55081 | ERPSAKKRKTT  | 22204 |
| O15123 | ATTMMIRPADF  | 22262 | O15354 | MSTFASVGT HC | 22228 | Q15406 | LHSCKTSVGKE  | 22204 |
| P19835 | KEAQMPAVIRF  | 22262 | P80303 | PAGELKFEPHI  | 22228 | Q13177 | MAAKEAMKSNR  | 22204 |
| P56557 | YKFGRTTELWT  | 22262 | P40205 | EGRPPCLKINK  | 22228 | P26442 | ISLSRLDLGSG  | 22202 |
| P11717 | HDDSDDELLHI  | 22262 | P17029 | DAFGAFLKSCV  | 22228 | P09525 | KVLLVLCGGDD  | 22202 |
| Q12931 | SCWWIRYTRTP  | 22262 | O95415 | RRCPCNGATFA  | 22227 | O15144 | KTITGKTFSSR  | 22202 |
| P08709 | RPGVLLRAPFP  | 22261 | P55285 | MYGCVDSKDKS  | 22227 | Q16877 | EEALVTVPAHQ  | 22202 |
| P52179 | LESLLGGKKAK  | 22261 | Q06432 | WESCMDAEPH   | 22227 | O00743 | IPPRTTTTPYFL | 22202 |
| P09564 | CNTLSSPNQYQ  | 22259 | Q9Y233 | SVAQKAAASED  | 22227 | Q01064 | EDEHNQNGNLD  | 22201 |
| P29466 | LTRCFYLPFGH  | 22259 | Q12887 | SGGGDAGPPPS  | 22227 | Q04828 | GPPNYPFSDEY  | 22201 |
| O00451 | VLSVLMKLQAL  | 22259 | Q08447 | VKELKGGCVIS  | 22227 | P57054 | FLAAKELYTKN  | 22201 |
| P10606 | HYKLVPQQLAH  | 22258 | P45983 | EAAAGPLGCCR  | 22226 | P48664 | SRGRGGNESAM  | 22201 |
| P08567 | KAIQMASRTGK  | 22258 | P09417 | EGRTELTPAYF  | 22225 | P53796 | ERRGESTMSAH  | 22201 |
| P19022 | KLADMYGGGGDD | 22257 | P51452 | DRLAKEGKLP   | 22225 | P30954 | ALCRAVGGKFS  | 22201 |
| Q13606 | EKVLRSKVDSS  | 22257 | P01817 | WGQGTTLTVSS  | 22225 | O60231 | KKIGKTREELG  | 22200 |
| P04040 | SHLAAREKANL  | 22256 | P52701 | VHKLTLIKEL   | 22224 | Q92988 | HSSDVLSPQMM  | 22200 |
| P21918 | KITPFTPNFGH  | 22256 | Q92838 | GAIRLEGAPAS  | 22223 | P21741 | KAKAKKGKGD   | 22200 |
| P01706 | FGGGTTLTVLGL | 22256 | P47869 | LNREPVLVGSP  | 22223 | P81274 | FKNSGKKSADH  | 22199 |
| P47886 | GVGVFNTVINP  | 22256 | P15248 | KEKMRGMGRGI  | 22223 | O00222 | TTYISYSNHSI  | 22199 |
| P24043 | HWRLILPRPWN  | 22255 | P10244 | PSHTSRTLILS  | 22223 | P01163 | QPPGSGKVLFF  | 22199 |
| P23946 | RPWINQLQAN   | 22255 | P43629 | AKPRSKVVSCP  | 22223 | Q16633 | ALNHTLSVEGF  | 22199 |

**ID:** ID from Uniprot Database (<http://www.uniprot.org/>) **Sequence:** Listed sequences match the Uniprot ID, but for the array experiments and for the computational predictions, the cysteines were changed to serine. **NA:** not available. **BLU:** biochemical light unit.

Table S1: Binding data from CAL peptide array.

| ID     | Sequence     | BLU   | ID     | Sequence     | BLU   | ID     | Sequence     | BLU   |
|--------|--------------|-------|--------|--------------|-------|--------|--------------|-------|
| P20774 | CLKRLPIGSYF  | 22199 | P32249 | MMHKSNSNGK   | 22169 | P31785 | APPCYTLKPET  | 22148 |
| P50443 | CVPNGLSLSSD  | 22198 | Q99687 | FGTRKEEWHYL  | 22169 | Q02817 | ARRSPRHLGSG  | 22148 |
| P49685 | FARRRRKRSVSL | 22198 | P43366 | RAPFSRSSHPM  | 22169 | P57740 | GLDPLGYEIQI  | 22148 |
| P11055 | SSRMVVHESEE  | 22198 | Q07687 | GGAPVSAGTIF  | 22168 | Q9UPR5 | SLEAYCHIRGF  | 22148 |
| P48723 | PNKHLQKTNFN  | 22198 | Q92949 | LQDWASVGAFL  | 22168 | P13688 | TEHYSEVKKQ   | 22147 |
| P13945 | QRLDGAWSGV   | 22197 | Q15080 | KDNYRVYNTMP  | 22168 | P23511 | EEAMTQIRVS   | 22147 |
| P11161 | LAPCSSRTRTP  | 22197 | Q06141 | VRLPYVCKFTD  | 22168 | P12829 | YEAFFVKHMSG  | 22147 |
| P08473 | YMNPEKKCRVW  | 22197 | P48553 | QDDHVLEVSVT  | 22167 | P12882 | REVHTKIIESE  | 22147 |
| Q15777 | IIFDLNPQGS   | 22196 | P21439 | MVSVQAGTQNL  | 22167 | P07197 | HAIVKEVTQSD  | 22147 |
| P31751 | PQFSYSASIRE  | 22196 | O95222 | DPDPKKGSRNV  | 22167 | P47887 | VICKRKNPFL   | 22147 |
| P05423 | DFESLLDHKHR  | 22196 | Q08211 | YFGQGRGGGGY  | 22166 | P50458 | SPSQTTLTNLF  | 22146 |
| O75665 | GFSHEELDDSW  | 22196 | P56211 | KPSLVASKLAG  | 22165 | P03956 | KANSWFNCRKN  | 22146 |
| Q14210 | SLLAIVILAPSL | 22196 | P35226 | SVNGSSATSSG  | 22165 | Q9UIE0 | DIILSLFLNDM  | 22146 |
| Q14566 | LVVNPNYLLD   | 22196 | P20807 | VLEWLQLTMYA  | 22165 | P19876 | IEKILNKGSTN  | 22145 |
| Q13368 | DTHWVPVSWVR  | 22196 | Q13620 | KENPNQYNYIA  | 22165 | Q13330 | PVNDEPIVED   | 22145 |
| Q9UNT1 | TPSEEAASPHS  | 22196 | Q9UBR4 | SWLDEVHQAQF  | 22165 | P80520 | NALMDGASGLM  | 22144 |
| P53396 | ISYVLPHEHMS  | 22195 | O43318 | RSQQQKRQGT   | 22165 | P07741 | PVPFSLQYQE   | 22144 |
| P19878 | TTDLESTRREV  | 22195 | O00273 | QNPKRARQDPT  | 22164 | P33151 | YGSDPREELLY  | 22144 |
| P17752 | ALAKVSRKPSI  | 22195 | Q99504 | SLHQAELDFL   | 22164 | P24046 | LFNLIYWSIFS  | 22144 |
| Q92747 | LESSIQGLRIM  | 22193 | P04209 | FGGGTKLSVLG  | 22164 | P80421 | WGQGTTVIVSS  | 22144 |
| P29474 | FDPPGSDTNSP  | 22193 | O95382 | RAGSTPVTSGP  | 22164 | P43356 | LHERALREGEE  | 22144 |
| P05026 | GRFDVKIEVKS  | 22192 | Q92794 | KQSLNGPYMRR  | 22164 | Q9Y6L6 | PSAGADSETHC  | 22144 |
| P49327 | SLAEPVRSREG  | 22192 | P03891 | LIPSPFMLML   | 22164 | Q15118 | EPKDMTTFRSA  | 22144 |
| Q02556 | SFFRENQQITV  | 22192 | P51861 | IDWKTWIWWKT  | 22163 | Q9Y3A4 | LLRAQRKFRPY  | 22144 |
| P08183 | MVSVQAGTKRQ  | 22192 | Q07507 | MTEYDCEFANV  | 22163 | Q15915 | ALSSNFNEWYV  | 22144 |
| O15382 | GIRAHWMMFPV  | 22191 | P42566 | IALSKSEISEA  | 22163 | P06731 | MIGVLVGVVALI | 22143 |
| Q01638 | LSRKNPSKECF  | 22191 | Q14773 | LCKCLAMKSQA  | 22163 | Q99661 | SRQISSKKRPQ  | 22143 |
| P25388 | VRVWQVTIGTR  | 22190 | P43489 | QADAHSTLAKI  | 22163 | Q13164 | LLADLPDLQDP  | 22143 |
| Q99542 | TLSATETTFEY  | 22190 | P78363 | RAAGASRQAQD  | 22162 | P14543 | NTLGVDICIERK | 22143 |
| O76099 | FFNGDITAGLS  | 22190 | Q16671 | NPQPACTLSPV  | 22162 | O43272 | LRTGNLFHHPA  | 22143 |
| P56134 | HLKHRLRKYH   | 22189 | Q9Y5R5 | YSYVYVIMNHL  | 22162 | Q15825 | LQPLLGNTGKS  | 22142 |
| P20849 | LERLTAAWLSA  | 22188 | P51512 | LYCKRSMQEWV  | 22162 | P20265 | PPHHGVQTPVQ  | 22142 |
| P55273 | DILQGHMVAPL  | 22188 | P05408 | PHFSDEKDP    | 22161 | Q16674 | VKTDKWDFYCQ  | 22141 |
| P49281 | NTMDADSLVSR  | 22188 | P36894 | AKMVESQDVKI  | 22161 | Q00059 | KKQRKYGAEEC  | 22141 |
| P45984 | DASTGPLEGCR  | 22187 | P07438 | KGSSEKCRCCA  | 22161 | Q09666 | EVELSVSTKKE  | 22140 |
| P26038 | TKQRIDEFESM  | 22187 | O14841 | WWMFILGAFGA  | 22161 | Q15696 | RDRTVQSPKSK  | 22140 |
| P15291 | TQITVDIGTSP  | 22187 | P28332 | EAVELMKTGKW  | 22160 | P35670 | LLNGRDEEQYI  | 22139 |
| P12004 | LAPKIEDEEGS  | 22187 | O75508 | SSPTHAKSAHV  | 22160 | P08185 | SLFLARVMNPV  | 22139 |
| P08319 | RCQEQRFLSD   | 22186 | O14647 | NLCQELFLGRK  | 22159 | O95471 | YPKSNSKEYV   | 22139 |
| O43520 | GTAEYFRITGDS | 22186 | P45985 | PATPSSPMYVD  | 22159 | P10242 | VNAFSAITLVM  | 22139 |
| O76096 | QHFEVPLVRCH  | 22186 | P29475 | SKKDTDEVFSS  | 22159 | P20309 | IFHKRAPEQAL  | 22138 |
| Q14995 | SEELAFKVFHP  | 22186 | P15144 | VVLQWFTENSK  | 22158 | Q99643 | TVLSMGLAAM   | 22138 |
| P53671 | MQYGLTRDSP   | 22185 | P40259 | KWSVGEHPGQE  | 22158 | Q9ULX7 | VFTSAQATTEA  | 22138 |
| Q99102 | HATPLPVTDS   | 22185 | P01258 | RPHVSMQPAN   | 22158 | P11532 | TPGKPMREDTM  | 22138 |
| Q99733 | DEDDAEINPKV  | 22185 | P25089 | SPPEETELQAM  | 22158 | P19138 | MPVPAAGAAQQ  | 22138 |
| P50876 | CSKGDDDDPLPT | 22184 | P19877 | ITSLEVDKAGR  | 22158 | Q9UK45 | IPNPFIIQQDA  | 22138 |
| P08547 | LETILSKLSQ   | 22183 | P12074 | VNPLPTGYEDE  | 22157 | O14770 | NMGMDGQWHYM  | 22138 |
| Q15388 | SAQSLEAEDDVE | 22183 | P05976 | YEAFFVKHIMS  | 22157 | P02818 | QEAYRRFYGPV  | 22138 |
| P55087 | KDQSGEVLSSV  | 22182 | Q15772 | QCEARLEVRGE  | 22156 | O15509 | RIVAEFLKNF   | 22137 |
| Q9P0U1 | PEPTVLSLLWG  | 22182 | P12111 | AKPGVISVMGT  | 22156 | O14867 | QQMTDKCTTDE  | 22137 |
| P16615 | TDTNFSDMFW   | 22181 | Q9Y217 | SLEYGVARMTC  | 22156 | P21854 | ICEMTAFRFPD  | 22137 |
| O14958 | DNDDSDDDDE   | 22181 | O15130 | SLEAAPQRFKK  | 22156 | P02686 | DSRSGSPMARR  | 22136 |
| P39880 | ASREEPIWEF   | 22181 | P24407 | KRSSFFRCVLL  | 22156 | Q15546 | YRSPDTFMRHL  | 22136 |
| P17050 | YPIKNELEMSQ  | 22181 | P13994 | PDHPAGARDGR  | 22155 | P19105 | ILKHGAKDKDD  | 22135 |
| P34982 | RLLDKHFKRLT  | 22181 | P29274 | DPLAQDQAGVS  | 22155 | P37275 | EQVSEKKTNEA  | 22135 |
| P51858 | EAPGIRDHESL  | 22180 | O75173 | ILRRRPWAGRK  | 22155 | P11229 | GSVHRTPSRQC  | 22134 |
| Q92887 | AGIENVNSTKF  | 22179 | Q02221 | VNPLPTGYEHP  | 22155 | Q10570 | LLETDRVTAHF  | 22133 |
| P51817 | PQKDLEIFKNF  | 22179 | Q14314 | KMMIRPKHFKP  | 22155 | P17813 | QSTPCSTSSMA  | 22133 |
| P35443 | FQTNFDRFDN   | 22179 | Q00444 | KDSKMKSKKAL  | 22155 | P42357 | KSTKIPESEDL  | 22133 |
| Q14137 | SGADGTVRLFT  | 22179 | P43631 | DEQDHEQVSYA  | 22155 | P20155 | HNKIIRNGPC   | 22133 |
| P30411 | HKLQDWAGSRQ  | 22178 | Q14994 | AMMPLLQEICS  | 22155 | P54315 | REDTLLTLTPC  | 22133 |
| P12109 | PPGHQGGPPGD  | 22178 | P01298 | AVPRELSPDL   | 22155 | P09848 | SQQLSPVSSF   | 22133 |
| P41180 | GSTVTENNVNS  | 22178 | P27105 | GIIGAKHSHLG  | 22154 | P43354 | IDKFLDLTLPF  | 22133 |
| P42658 | TVTAKEDDEED  | 22178 | P12271 | GPQAQAENTAF  | 22154 | P45452 | RVMPANSILWC  | 22132 |
| P52732 | SRLPLRAQINL  | 22178 | O15438 | FYGMARDAGLA  | 22154 | Q99550 | PCHLYDYRFQG  | 22132 |
| P51816 | LCWLRLDAHLL  | 22178 | O95156 | YHSETPYLSSG  | 22154 | O43462 | VTGLGLWMVTAR | 22132 |
| P03886 | PITISIPPQGT  | 22178 | P02649 | TSAAPVPSDNH  | 22153 | P07196 | AGEEQAAKKKD  | 22132 |
| P12643 | QDMVVEGCGCR  | 22177 | P22681 | VSISPAHVAT   | 22153 | P16112 | HPRRSRPSTAH  | 22132 |
| Q13158 | WNSDASTSEAS  | 22177 | P11487 | RLGSQLEASAH  | 22153 | P02787 | SLEACTFRFP   | 22132 |
| P30203 | TIPKEGPGPAP  | 22176 | P48029 | SSKVVVSVESVM | 22153 | P51825 | FQQLQELTKTP  | 22131 |
| O60673 | APYLRQLLDQF  | 22176 | P30807 | FAAHSASLTVR  | 22153 | O00358 | PGGIDRFVSAM  | 22131 |
| P52564 | VASFVKLILGD  | 22176 | P11678 | PRLNLSAWRGT  | 22153 | Q13257 | SMVAYKIPVND  | 22131 |
| P05937 | DLALILCAGDN  | 22175 | Q16763 | KKRALRALRRL  | 22153 | P01023 | NAPCSKDLGNA  | 22130 |
| Q14112 | AVPYPCPTGRK  | 22175 | P36406 | QLVAAGVLDVA  | 22152 | P51530 | LCHILGDFQRE  | 22130 |
| P32927 | PWEVYNKPGEV  | 22174 | P05305 | ERYVTHNRAHW  | 22152 | O43676 | LESLNKDKKHH  | 22130 |
| P50549 | NHPYNEGYYV   | 22174 | P08574 | KSRKLAYRPPK  | 22151 | Q9Y6N1 | EGHKLFPVPGYN | 22129 |
| P16333 | GEKLYLVKHL   | 22174 | P20393 | EKLLSFRVDAQ  | 22151 | O95424 | SELDVDFDAYLE | 22129 |
| P49447 | TLRQGDSPGSQ  | 22173 | O00483 | YSKLKKERPDP  | 22151 | O14732 | QTINYGRDDEK  | 22129 |
| Q12929 | GVESFDEGSSH  | 22172 | O14599 | TGSVSKPRSQK  | 22149 | P22307 | NLQLQPGNAKL  | 22129 |
| O60825 | LRAQDMQEGAD  | 22172 | P31040 | CATVPPAIRSY  | 22149 | O95180 | PAPGGGADDPV  | 22128 |
| P55160 | YREVSRFAHLN  | 22172 | O75417 | ASWGELKDFDV  | 22149 | O43143 | EVIERTALKDE  | 22128 |
| Q03692 | SSFSGLFVAPM  | 22171 | Q05810 | VACKKACMLGQ  | 22149 | Q16363 | GAVSINSCPA   | 22128 |
| O14727 | LGILYLQTLLE  | 22170 | Q99538 | LSMDHVCGLGHY | 22149 | P33992 | RMQRKVLYRLK  | 22128 |
| Q13790 | DLDPGAGSLEI  | 22170 | P19256 | CDRKLDPRTNSN | 22149 | Q13585 | DVEDDPDEMAY  | 22128 |
| P54132 | RPFLKPSYAFS  | 22170 | Q01860 | VTTLGSPMHSN  | 22149 | O15440 | AAAENKVAVKG  | 22128 |
| P9Y281 | NVVVSLGKPL   | 22170 | P35249 | ATVMQQLSQNC  | 22148 | O60356 | NSERKKRGARR  | 22128 |
| P30040 | FQKKGAKEEEL  | 22170 | P08133 | KALLALCGGED  | 22148 | P22792 | HTGAGEGLWGW  | 22127 |
| P16475 | YEAFFVRHILSG | 22170 | O96018 | LLTGQECPVYL  | 22148 | P31994 | ALEPDDQNR    | 22127 |

**ID:** ID from Uniprot Database (<http://www.uniprot.org/>) **Sequence:** Listed sequences match the Uniprot ID, but for the array experiments and for the computational predictions, the cysteines were changed to serine. **NA:** not available. **BLU:** biochemical light unit.

Table S1: Binding data from CAL peptide array.

| ID     | Sequence      | BLU   | ID     | Sequence     | BLU   | ID     | Sequence     | BLU   |
|--------|---------------|-------|--------|--------------|-------|--------|--------------|-------|
| Q15012 | EKEPPPPYLP    | 22127 | P57103 | GELEFKNDETV  | 22101 | Q99967 | VCKQPPSRVSC  | 22082 |
| P56704 | AERRREKRCRV   | 22127 | O75607 | ILPAKKQGGGR  | 22101 | O43639 | GEKLYLVRLALQ | 22082 |
| Q12797 | TPQQRRLSPAI   | 22126 | P30531 | AGSSTSKEAYI  | 22101 | P43657 | KSKIFDNESAA  | 22082 |
| P11049 | DHVVYNNRLARYR | 22126 | P11926 | RAACASASINV  | 22100 | O75153 | AAKDPSPSVQG  | 22081 |
| Q9Y4Z1 | VVLVAPPLRVG   | 22126 | O00757 | LTCVQKNQAGS  | 22100 | Q9Y6J6 | NIGAAGFKMSP  | 22081 |
| P08254 | HTLKSNWSLNC   | 22126 | Q13724 | SLVLLAMAEDY  | 22100 | P49006 | GPTPASAEQNE  | 22081 |
| P12883 | RDIGTKGLNEE   | 22126 | Q07820 | GVGAGLAYLIR  | 22100 | P57105 | AWAFMRYRQQL  | 22081 |
| P01185 | EPFEPAPQDAY   | 22126 | P35410 | LPREHRVDVET  | 22100 | Q99572 | EGQYSGFKSPY  | 22081 |
| O75110 | FSPPSYSKLTS   | 22125 | P18074 | LKRIEQIAQQL  | 22100 | P49788 | LTSVRQWVRKT  | 22081 |
| P20273 | QENVVDYVILKH  | 22125 | Q05996 | YLYEKRTVSNH  | 22100 | P42127 | ACSCRVLSLNC  | 22080 |
| P54277 | FHHLTYLPETT   | 22125 | P21333 | IPGSPYRVVVP  | 22099 | P55008 | PPAKKAISELP  | 22080 |
| P51884 | CLRVANEVTNL   | 22124 | O43823 | DAESKDAVPT   | 22099 | Q13075 | WILPFSPIHQ   | 22080 |
| P49279 | LEEDQKGETSG   | 22124 | P27695 | DHCPITLYLAL  | 22099 | Q9Y5A7 | VENRKSATKKK  | 22080 |
| P32242 | KDQASWRQFVL   | 22124 | Q9Y679 | RFTERRAQEAD  | 22099 | Q02641 | LEGWGRGVYIR  | 22080 |
| P09012 | NNAMKISFAKK   | 22124 | P20931 | SLANMVEPCLY  | 22099 | Q14232 | AVSDELIKLYL  | 22080 |
| P05451 | DKFSFVKFKN    | 22123 | P36405 | WVCKNVNAKKK  | 22098 | P55345 | KVGEKVPPIWR  | 22079 |
| P26358 | AKIKEEEAAKD   | 22123 | P30042 | MVRKVLLETKG  | 22098 | Q92858 | HSYSDSDEAS   | 22079 |
| O00574 | HNVEATPMFQL   | 22122 | P40692 | LPDLYKVFERC  | 22098 | P55289 | EEESYNPDKVT  | 22079 |
| P02746 | SGFLTFPDMEA   | 22122 | O75534 | ERKIRQAGVID  | 22098 | Q14209 | DSYDLGLDLIN  | 22079 |
| Q9UBR2 | EEHCTFGDPIV   | 22122 | P40394 | SCQSIRTVLTF  | 22097 | P54963 | PVSQPSLVGSK  | 22079 |
| Q02880 | EEDDDVDFAMFN  | 22122 | P20674 | STPEELGLDKV  | 22097 | O00213 | LKPKRLGAHTP  | 22078 |
| O75531 | GCLREWCDAFL   | 22121 | P34903 | ESAIKGMIRKQ  | 22097 | P11912 | LNIGDVQLEKP  | 22078 |
| P21730 | VDTMAQKTQAV   | 22121 | P35749 | DADFNGTKASE  | 22097 | P34910 | ESLPPPPAELL  | 22078 |
| Q99426 | FPEEDYGLDEI   | 22121 | O95232 | VCLFGNRYPHL  | 22097 | P50895 | RGSGSGFGDEC  | 22078 |
| P55287 | YGSKDTFDDDS   | 22120 | Q9UBJ2 | LKTIKNEDETS  | 22096 | Q14108 | TADERAPLIRT  | 22078 |
| P24385 | CTPTDVRDVID   | 22120 | P22570 | DPQEMLRLLGH  | 22096 | Q13508 | SVSAINFLVAL  | 22078 |
| O75381 | PEGASNESERD   | 22119 | P98194 | VSSTSSSFLEV  | 22096 | Q99435 | CSVDPQCLQEL  | 22078 |
| P43897 | CGEESAAEATE   | 22118 | O60911 | GIATAASYPNV  | 22096 | Q12816 | ASLGACGFSYG  | 22078 |
| Q16769 | LQVFVLEYLHL   | 22118 | Q12873 | HRFFKKVPEIQ  | 22096 | P24588 | SDDNKINLLQ   | 22077 |
| O00253 | LGTAMNPCSRT   | 22117 | Q9Y3B8 | IENGNEKTVS   | 22096 | P49914 | DEVLYEDSSTA  | 22077 |
| Q15326 | AEHKRTCKRRK   | 22117 | P42025 | DGSRAIHRKTF  | 22095 | P38571 | NKIINLMRKYQ  | 22077 |
| P14138 | CPRCLFQEGAP   | 22117 | P20645 | SEERDHLPLM   | 22095 | Q13751 | NGRVLYATCK   | 22077 |
| Q13451 | AMEEEKPEGHV   | 22117 | P21851 | IYQVYDSILKN  | 22094 | P36952 | NIIFGKFCSP   | 22077 |
| P43363 | SSATGSFSYPE   | 22117 | O95342 | YKLVTTGSPIS  | 22094 | O15481 | RATSSSSSQPM  | 22077 |
| Q08209 | DSNGSSNNIQ    | 22117 | P52888 | VGGCEPEPQVC  | 22094 | P34972 | PDSRDLDLSDC  | 22076 |
| Q00888 | ITVKVSDWILP   | 22117 | P32297 | FLQPLMAREDA  | 22093 | P27658 | SSFSGYLLYPM  | 22075 |
| P55263 | GCTFPEKPDFH   | 22115 | Q16787 | GPVSLNGCPDQ  | 22093 | Q16854 | MREVNTFVKNL  | 22075 |
| O00238 | AKMSSEQDIKL   | 22115 | P25205 | VMVSEGIHFLI  | 22093 | Q99698 | FYSFLSSYAAG  | 22075 |
| P49411 | MTEEEKNIKWG   | 22115 | P56277 | EENLTRKSASK  | 22093 | O00470 | NMGMEGQWHYM  | 22075 |
| Q14392 | RRQKTFQYKYA   | 22115 | P16109 | VFTNAFDPSP   | 22092 | P55157 | PQPDSTSSGWF  | 22075 |
| P06905 | VLKLMGRGTFK   | 22115 | Q05195 | LQDSHKACLGL  | 22092 | O95801 | CYRFYSTRTGL  | 22075 |
| Q01780 | KDGFYNNWPRQ   | 22115 | P25189 | KRGLGSRKDKK  | 22092 | P57077 | RIQYQKRQGSS  | 22074 |
| O95777 | IRAEPLNSVAH   | 22114 | O43805 | PDQKSSGGRDS  | 22092 | P33076 | LQQQDSRISLR  | 22074 |
| Q9Y4Z0 | EKKPGRQAGKQ   | 22113 | Q13216 | EDAWSSSDEEG  | 22091 | P54284 | QRNRPWPWKDSY | 22074 |
| P78395 | EPILCPCFMPN   | 22113 | Q16690 | SRSPVATATSC  | 22091 | Q04741 | NGEDIDVTSND  | 22074 |
| P42679 | DGSTSPRSQEP   | 22113 | P56270 | VSSQPPLSPQW  | 22091 | Q01740 | ALLVAIFLFL   | 22074 |
| O60942 | PPPPKRPRLPT   | 22113 | Q15742 | SVKVEAEASRQ  | 22091 | Q9Y333 | AARKEALQKQK  | 22074 |
| P54296 | LIPASASAAAG   | 22113 | Q15843 | LALRGGGGRLRQ | 22090 | P25912 | QSRKKLRMEAS  | 22074 |
| P49790 | RKIKTAVRRRK   | 22113 | P02533 | STHEQVLRITKN | 22089 | P35227 | TVNGAPVPPLT  | 22073 |
| P17677 | EEEPADQGEHA   | 22113 | P43359 | ADLIHFLLLY   | 22089 | Q13015 | ASHSFELDLL   | 22072 |
| P20292 | STTISPLLLIP   | 22112 | P22897 | GNIEQNEHSVI  | 22089 | O43687 | QNGNDNENNRK  | 22072 |
| P46926 | KSQSSKPKPYSD  | 22112 | Q00266 | FPWEVPRKLVF  | 22089 | P39195 | GVSHRAPPPA   | 22072 |
| Q12889 | IPENSAVDEEA   | 22112 | P39656 | FLHMKKEKESD  | 22089 | O43681 | LLEPYKPPSAQ  | 22072 |
| Q92778 | NELPYCKFKV    | 22112 | Q01954 | KSLASSPSHLQ  | 22088 | P16118 | EEALDTPVAHY  | 22072 |
| Q06250 | PGVTQRPRTTE   | 22112 | Q9Y463 | RGVPQSTAASS  | 22088 | P49593 | PEPETQAPPRS  | 22072 |
| P00813 | MPPSASAGQNL   | 22111 | P21781 | KTAHFLPMAIT  | 22088 | P07327 | SGKSIRTLMF   | 22071 |
| O00187 | IPWIENISDF    | 22110 | P11047 | GCFNTPSIEKP  | 22088 | P29317 | KDQVNTVGIPI  | 22071 |
| P35318 | APPSGSAPHFL   | 22109 | Q07954 | GPEDEIGDPLA  | 22088 | Q99612 | DHLALHMKRHL  | 22070 |
| P08236 | KSQCLENSPFT   | 22109 | P43088 | ESPVAEKSAST  | 22088 | P32243 | DQTSWKFQVL   | 22070 |
| P06881 | AFGRRRRDLQA   | 22109 | P04211 | EYYCLLYYGGA  | 22087 | P82251 | MEVVPPEEDPE  | 22069 |
| P46966 | ILHLVMMNFVG   | 22109 | O60882 | SVVSSSWIGC   | 22087 | Q02388 | VQSQTGTGAQD  | 22069 |
| P13929 | AGRKGRFPAKAK  | 22109 | Q29631 | GSDSLITCKA   | 22086 | P50454 | RPKGDKMRDEL  | 22069 |
| Q02509 | GPLGICPLHGR   | 22109 | P42685 | SSYSDANNFIR  | 22086 | P07948 | TATEGQYQQLP  | 22069 |
| Q15848 | FTGFLYHDTN    | 22108 | P04150 | GNIKLLFHQK   | 22086 | P27361 | ARFQPGVLEAP  | 22069 |
| P57060 | VFQMFQVEGQ    | 22108 | Q14802 | PPLITPGSAQS  | 22086 | Q14582 | HCRRLGRPAL   | 22068 |
| P06705 | LDIHKKMVVDV   | 22108 | P28482 | ETARFQPGYRS  | 22086 | P02776 | YKKIHKLLS    | 22068 |
| P47224 | FYVALERSVHE   | 22108 | Q13795 | VHRPPRQRDIT  | 22085 | P05184 | VESRDGTVSGA  | 22067 |
| Q00007 | NNLYIFQDKVN   | 22107 | O95177 | SSSRHLSRTQT  | 22085 | Q14896 | CECRLEVRVPQ  | 22067 |
| O14682 | AFVSTWKHLPS   | 22107 | P11413 | GTYKWWNPHKL  | 22085 | P49257 | SQQEAAAKKFF  | 22066 |
| Q16655 | SAEQSPPPYSP   | 22107 | Q9Y2U5 | ELLRHMFVHYH  | 22085 | P35498 | QEGKDEKAKGK  | 22065 |
| P50222 | DSDDHSEHAHL   | 22107 | Q12986 | EPIDYFDVQD   | 22085 | P27815 | PGGGGSGGDPT  | 22065 |
| P08172 | MCHYKNIGATR   | 22106 | P55209 | KDQNPACCKQQ  | 22085 | P28300 | AYASGCTISPY  | 22065 |
| Q16134 | EGGGGPAAYNGM  | 22106 | O60566 | KLTSPGALLFQ  | 22084 | O96000 | KAAKEAAAATS  | 22065 |
| Q12866 | DDSEGESEVL    | 22106 | P02745 | VFSGLFIIPSA  | 22084 | P39189 | LGLQAGATAPG  | 22064 |
| P15382 | NTHLPETKPS    | 22106 | Q9Y6J0 | ETDEDDDYMDI  | 22084 | Q13634 | LYGEIESERTT  | 22064 |
| P16299 | ENHGTGNHTAQ   | 22106 | P08217 | IDWINSVIANN  | 22084 | Q14511 | FKRSLLEMATF  | 22064 |
| P10275 | GKVKPIYFHTQ   | 22105 | P29322 | MENGSLDTFLR  | 22084 | O00311 | LLHPFFKDMSL  | 22064 |
| Q07021 | LEDLKSFVKSQ   | 22105 | P52756 | KAMFARFIEME  | 22084 | P51828 | DTAKFQGLGLN  | 22064 |
| P35240 | AKSRVAFEEEL   | 22105 | P80422 | FGQGTDLTVLG  | 22084 | Q99707 | WLGPIGLYDTD  | 22064 |
| P51813 | SIEPLKEDKH    | 22104 | Q9UJ68 | TGVSCPVGKIK  | 22084 | P50406 | LRPHPLGIPTN  | 22063 |
| O43918 | SMARPAAPFPS   | 22103 | P13533 | IGAKQKMHDEE  | 22084 | O14753 | VTSLQLGGSPHL | 22063 |
| O14520 | PLHESMALEHF   | 22103 | P30876 | SMSIAPRMMSV  | 22084 | P41279 | LVRGPPTLEYG  | 22062 |
| Q00688 | LTFFELVLDID   | 22103 | P43681 | LFLPPWLAGMI  | 22083 | P24001 | PQKCEPQSSK   | 22062 |
| Q9Y690 | VALPEYHRKAV   | 22103 | P12429 | ITLLKICGDD   | 22083 | P51690 | LCWCLREDDPQ  | 22061 |
| P31327 | HYRQYSAGKAA   | 22102 | Q14831 | KKYVSYNNLVI  | 22083 | Q03701 | ENMGSKFDNIA  | 22061 |
| P01876 | VVMAEVDGTCY   | 22101 | Q16659 | QTYSSILKHLN  | 22083 | P48960 | TRALRASESGI  | 22061 |
| P09038 | AILFLPMSAKS   | 22101 | Q15014 | VASAEYHRKAL  | 22083 | Q08708 | SRQNWPKGENQ  | 22061 |
| P43355 | EAALREEEEGV   | 22101 | Q16645 | LIFDVELLNLE  | 22082 | O43246 | QAPAQDPGHME  | 22061 |

**ID:** ID from Uniprot Database (<http://www.uniprot.org/>) **Sequence:** Listed sequences match the Uniprot ID, but for the array experiments and for the computational predictions, the cysteines were changed to serine. **NA:** not available. **BLU:** biochemical light unit.

Table S1: Binding data from CAL peptide array.

| ID     | Sequence     | BLU   | ID     | Sequence     | BLU   | ID     | Sequence     | BLU   |
|--------|--------------|-------|--------|--------------|-------|--------|--------------|-------|
| P29966 | SPEAPPAEAAE  | 22061 | P03901 | DYVHNLLNLLQC | 22041 | O14519 | CLAEFTERNARS | 22023 |
| O60568 | TRYIMVSFVDP  | 22061 | P51575 | TLGLQENMRTS  | 22041 | Q99518 | VVAFFCQLQWS  | 22023 |
| Q01742 | DRILTLTTNEI  | 22060 | Q04771 | DNSLDKLTDC   | 22040 | P57078 | PAATLLRRSKT  | 22022 |
| Q93088 | ELFEKQKFQSQ  | 22060 | P11150 | IKSKTSKRKIR  | 22040 | P41211 | LQCDPSSRSQF  | 22022 |
| P12645 | PNMTVESACACR | 22060 | Q13469 | EFSGPPARNQT  | 22040 | Q13506 | KVIKTEPEDSR  | 22022 |
| P08686 | GMGAHSPGQNG  | 22060 | Q95867 | SLAGLGLWLLH  | 22040 | Q14973 | YKGEDCSPCTA  | 22022 |
| P22607 | PAPPSSGGSRT  | 22060 | Q02952 | RESAKSELTES  | 22039 | Q9Y5P8 | YACGDEDELEPL | 22021 |
| Q14152 | TDEDGWTTVRR  | 22060 | P02760 | DGDEELLRFNS  | 22039 | P07451 | INNRVVRASFQ  | 22021 |
| P14649 | YEAFLKHILSV  | 22060 | P21453 | IMSSGNVNSSS  | 22039 | Q13617 | QASADEYSYVA  | 22021 |
| P51810 | GDPALPTHGDL  | 22060 | Q03111 | KLQSCLEAVAT  | 22039 | P43357 | LHEWVLREGEE  | 22021 |
| O00459 | APGPGPPPAAR  | 22060 | P12259 | LRLELFGCDIY  | 22039 | P33316 | SGSGFGSTGKN  | 22020 |
| P24941 | DVTKPVPHRLR  | 22059 | P09960 | AMLVGKDLKVD  | 22039 | P54886 | ENLPIQNRNTN  | 22020 |
| P78369 | PSKQFDEKNAYV | 22059 | O75342 | DPVLIENSISI  | 22039 | Q13191 | FPPPVSPRLNL  | 22019 |
| Q14894 | KLIYDSWSSGK  | 22059 | Q15233 | AEFAPNKRERRY | 22039 | P08246 | PRDPDPASRTH  | 22019 |
| O14733 | VLSQPHLPFFR  | 22059 | Q92870 | LKQKRPVTEMP  | 22038 | P49771 | PSPQDLLLVEH  | 22019 |
| O60885 | SDSEDSPTGPA  | 22058 | P07355 | KALLYLCGGDD  | 22038 | Q13084 | PAVVQKTASGQ  | 22019 |
| Q16739 | CGGTAEELLDV  | 22058 | P55899 | LKDVNVIPATA  | 22038 | Q16798 | WPKEAMNVQTV  | 22019 |
| P56556 | FLSKFYVGHDP  | 22058 | O00566 | RQDISVHKLLK  | 22038 | Q10571 | NRFGTFVAALT  | 22019 |
| P02768 | LVAASQAALGL  | 22057 | O75414 | YVAGTGGLGPA  | 22038 | P49354 | TENDSPTNVQQ  | 22019 |
| P31415 | NTEDDDDDDDDD | 22057 | Q02640 | SVVPQEQEHAM  | 22037 | Q06190 | KCGKLQSVDEE  | 22018 |
| P24572 | YEELVRMVLNG  | 22057 | P12980 | MEQTALSPEVR  | 22037 | P13928 | NALLSLVSDP   | 22018 |
| Q12908 | KANGGFPQDEK  | 22057 | P53985 | EGGPKKEEESPV | 22037 | Q9NV3D | ETLHSLQTAF   | 22018 |
| Q15517 | GKIPCRSIRIS  | 22056 | O75694 | KSLQAKLERLH  | 22037 | P00533 | VAPQSSEFIGA  | 22018 |
| P46094 | GAFAYEGASFY  | 22056 | P19971 | PFAELVLPPQQ  | 22037 | O00167 | ALRHAELEYL   | 22018 |
| Q14117 | ATAGTRKQAHF  | 22056 | P23109 | NLIAEGLKSTE  | 22036 | P50221 | DGDSASPSE    | 22018 |
| O43237 | MVTNSSTEENAE | 22056 | Q07075 | REWFFNLLLESG | 22036 | O15297 | LHQHRKTVVCVC | 22018 |
| Q12778 | VKTTHSVWSG   | 22056 | P04083 | EKILVALCCGN  | 22036 | P54278 | HLNLGVISQN   | 22018 |
| O15234 | CTKCFSTPKGR  | 22056 | P24863 | NGSQNSSYSQS  | 22036 | P27338 | LAHKRGLLVRV  | 22017 |
| Q99547 | KAKKMFLKPDQ  | 22056 | Q9UJX0 | GLTLQWILTSR  | 22036 | Q99250 | DKGKDIRESKK  | 22017 |
| P43630 | RAPQSGLEGVF  | 22056 | P24390 | VLKGKLLSLPA  | 22035 | P23368 | ESASSPPVITE  | 22017 |
| P19404 | KGPGFGVQAGL  | 22056 | P07954 | WVKPKDMLGPK  | 22035 | Q99218 | ATDKTKQEEVD  | 22016 |
| P51116 | LELGSMVNGVS  | 22055 | P48742 | HPPEMNEAAVW  | 22035 | P43320 | WHQRGAFHPSN  | 22016 |
| P28845 | TSYNMDRFINK  | 22054 | P33527 | FYSMAKDAGLV  | 22035 | P41217 | GELSQGVQKMT  | 22016 |
| P55084 | GHAMIVAYPK   | 22054 | O15294 | MIKPVEVTESA  | 22035 | P41231 | AGSENTKDIRL  | 22016 |
| P49326 | LAFFAIIHAYF  | 22054 | P57739 | EFNSYSLTGYV  | 22034 | O15143 | LESALKDLKIK  | 22015 |
| P08758 | KALLLLCGEDD  | 22053 | P80419 | WGQGTLSVSVTS | 22034 | Q14508 | CGKVCVTPNF   | 22015 |
| P26998 | KWHKRGFRPSS  | 22053 | P43360 | LHEWALREGEE  | 22034 | P01229 | DHPQLSGLLFL  | 22015 |
| P54760 | PGGTGGPAPQY  | 22053 | Q9NZN9 | PPPSPGHSLOH  | 22033 | Q9Y5N6 | NAASAQKATAE  | 22015 |
| P48304 | KKFSFVCKFKN  | 22053 | P15090 | GVTSTRVYERA  | 22033 | P30532 | LIPVHIGNANK  | 22014 |
| P43358 | EAALLEEEEGV  | 22053 | P21462 | LPSAEVALQAK  | 22033 | P55064 | ERKKTMLTTR   | 22014 |
| Q9ULC6 | PFPFKWNNMVP  | 22053 | O00255 | LSFLKRQRKGL  | 22033 | Q08462 | SRLSQSNVAS   | 22014 |
| Q13507 | EKLNPMLRCE   | 22053 | P49286 | IIGVQHQADAL  | 22033 | O15480 | SKAKASSSSHA  | 22014 |
| O43315 | KPEKYELSVIM  | 22052 | Q15013 | QAPVTFKGFRE  | 22033 | O75027 | NSVKGCGNCSC  | 22013 |
| P54317 | EENVLQSLYPC  | 22052 | P35414 | IPYSQETLVVD  | 22032 | Q9UP79 | AKPCESQLCPL  | 22013 |
| P22676 | LEIVLCSEPPM  | 22051 | Q14596 | LNNNDWYSQRY  | 22032 | P55201 | GEQSSETSDSD  | 22013 |
| P47928 | VNKQGDVILCR  | 22051 | O43772 | MKFLNWTATPNL | 22032 | O43306 | TTYFLNNGPSS  | 22013 |
| P11226 | TSHLGDSCEFI  | 22051 | P00505 | YLAHAHQVTK   | 22031 | P23515 | LLNLNVVMLAV  | 22013 |
| P50548 | TAQLSLEHRDS  | 22050 | P01124 | SLYSLQFAGGN  | 22031 | Q9Y5K3 | SSMSEGDEDEK  | 22012 |
| P50440 | RRRGTLQSYLD  | 22050 | P56696 | SISRSVSTNMD  | 22031 | P31937 | VFQFLREETF   | 22012 |
| P05013 | RNLQERLRRKE  | 22050 | Q13342 | VDAESIQQMAP  | 22031 | Q9UBQ6 | GFPYANYKRKI  | 22012 |
| P56642 | NANAYFRSLIK  | 22050 | P48163 | EVQKIQTQVDQ  | 22031 | Q13505 | TLGMAEEDDEE  | 22012 |
| P32245 | LGGCLDSSRY   | 22050 | P41218 | KKNKEGPMNVN  | 22031 | P21810 | RLAIFGNYKK   | 22012 |
| Q9ULZ9 | ALWTAQAALTL  | 22050 | P47898 | SAFKNFPSRQH  | 22030 | P18582 | LCCGIRNSSVY  | 22011 |
| P49321 | EAGATVESTAC  | 22050 | P35368 | KSNMPLAPGQF  | 22030 | P21291 | QGGAGALVHSE  | 22011 |
| Q14956 | LLKNQEFKGVG  | 22050 | P20648 | PGSWWDQELY   | 22030 | P29692 | QSVDAIAFNKI  | 22011 |
| P07204 | HVRTERTPQRL  | 22050 | Q09161 | AVFQQFCALQA  | 22030 | P37286 | FSEDEAQDMEL  | 22011 |
| P49918 | SVEQTPRKRLR  | 22049 | Q16204 | LLGPELHSPGF  | 22030 | O43731 | KGKKLSLPMPI  | 22010 |
| P09603 | TQDDRQVELPV  | 22049 | Q14204 | ITMNPQYAGNS  | 22030 | O75352 | AKPPHKQKKAQ  | 22010 |
| Q05397 | RLKMLGQTRPH  | 22049 | P01774 | FAHYGQGTLT   | 22030 | Q92934 | NLGRGSSAPSQ  | 22009 |
| Q13753 | GCYNTQALEQQ  | 22049 | O00482 | LLIEMHLAKRA  | 22030 | P26992 | AAAATASSLLI  | 22009 |
| O75439 | QIRSNMCMWRD  | 22049 | P35070 | INEDIEETNIA  | 22029 | Q93063 | KLKSFNPISGL  | 22009 |
| O14678 | RWELMRKIVE   | 22047 | P24903 | PRPFQLCLRPR  | 22029 | P53667 | SGLPAHPEVPD  | 22009 |
| P21709 | RLCSIQGFKD   | 22047 | P42892 | PMNPPHKCEVW  | 22028 | Q9Y6G1 | MMILRLVLLL   | 22009 |
| O43262 | LNTIKKEKKMT  | 22047 | O43320 | PSMSRDLFHRY  | 22028 | P78325 | RKQGAGAPTAP  | 22008 |
| P15018 | KQIIAVLAQAF  | 22047 | Q16653 | GQFLEELRNPF  | 22028 | P26438 | GLTWLTSNYKS  | 22008 |
| P29803 | ANPWIKFKSVS  | 22047 | O00339 | MEALENRLRYR  | 22028 | P98198 | PSGGADKPLKG  | 22008 |
| P30825 | RTPDGNLDQCK  | 22046 | Q9Y5B8 | EVQYFFKILDN  | 22028 | Q99653 | VEQKMSIRFLH  | 22008 |
| P56178 | HPLALASGTLY  | 22046 | O00623 | QHLIKLYSPEN  | 22028 | P00001 | LIAYLKATNE   | 22008 |
| P08218 | NDWINSVIANN  | 22046 | Q13796 | LLDSLQPERGK  | 22027 | P19957 | GSCGMACFVPQ  | 22008 |
| P43121 | DQGEKYIDLRH  | 22046 | O14525 | PYNDYGDSKEI  | 22027 | P32418 | SLEAYCHIKGF  | 22008 |
| P29218 | QVIPLQRDDDD  | 22046 | P05023 | PGGWVEKETYY  | 22026 | P27986 | LAYPVYAQQRR  | 22008 |
| O15547 | DTLPLTHSGSL  | 22046 | Q13112 | ENKGGTESLDP  | 22026 | Q9Y3C3 | AKEQIKWSLLR  | 22007 |
| P19021 | APLAPALAPSS  | 22045 | P42898 | PTQNARETEAP  | 22026 | P08173 | LCQYRNIGTAR  | 22006 |
| P16233 | REEVLLTLTPC  | 22045 | O14646 | TPEHTWSSRKT  | 22025 | Q9Y243 | PQFSYSASGRE  | 22006 |
| Q9Y4Y8 | VLYISTQKRRM  | 22045 | Q92828 | IKNLRMGSEQL  | 22025 | P01884 | QPKIVKWDRDM  | 22006 |
| Q13496 | SQMMPHVQTHF  | 22045 | P22680 | DIEFKYKFKHL  | 22025 | Q02045 | YVITHGEEKKEE | 22006 |
| P55036 | GKKDKKEEDKK  | 22044 | Q16570 | SSHLDTLGSKS  | 22025 | P20594 | LGERKGPPGLL  | 22005 |
| Q9ULW5 | REGRGASCCRP  | 22044 | O00264 | EPKDEARKND   | 22025 | Q13329 | LPGLQDMFKK   | 22005 |
| P53582 | DSARPHEMSQF  | 22043 | P35579 | KADGAEAKPAE  | 22025 | P49184 | SLSPQLCPAA   | 22005 |
| Q99418 | RISVKKKQEQP  | 22043 | O00330 | KANLENPIRLA  | 22025 | O94772 | SLGPALLWAGP  | 22005 |
| P16671 | SYCACRSKTIK  | 22043 | Q9UNX4 | KKREKLILTLT  | 22025 | P55199 | EYDQRQLQAWP  | 22004 |
| P08253 | FGSIKSDWLGC  | 22043 | P48509 | CLYRSCLKLEHY | 22024 | P24530 | NFRSSNKYSSS  | 22004 |
| P06733 | AGRNFNRNPLAK | 22042 | P32321 | SINSRPSQKLQ  | 22024 | Q9Y6R4 | HSFVKVCTDEE  | 22004 |
| P14867 | EPQLKAPTPHQ  | 22042 | Q01726 | RTLKEVLTCWS  | 22024 | Q92982 | QKPLMDMAPQQ  | 22004 |
| P55085 | SSSTTVTKVSY  | 22042 | Q14982 | GTLAAHFIFIK  | 22024 | Q13520 | PGSGAVEMESV  | 22003 |
| P57723 | KKAERQKFSPY  | 22042 | P02775 | QKLAGDESAD   | 22024 | P46092 | PTETHSLSWDN  | 22003 |
| Q99856 | PSTSTNNSLP   | 22041 | P43699 | SCSTLLYGRTW  | 22024 | O43677 | ILEYKRRNGLE  | 22003 |
| Q13491 | FKSREDCCCTKF | 22041 | P35348 | TISLSENGEEV  | 22023 | P41159 | MLWQLDLSPGC  | 22003 |

**ID:** ID from Uniprot Database (<http://www.uniprot.org/>) **Sequence:** Listed sequences match the Uniprot ID, but for the array experiments and for the computational predictions, the cysteines were changed to serine. **NA:** not available. **BLU:** biochemical light unit.

Table S1: Binding data from CAL peptide array.

| ID     | Sequence     | BLU   | ID     | Sequence     | BLU   | ID     | Sequence     | BLU   |
|--------|--------------|-------|--------|--------------|-------|--------|--------------|-------|
| P43115 | STLMWSDHLER  | 22002 | Q14129 | QCDQKGSVPFP  | 21979 | P04436 | IFSGSTRLSIR  | 21960 |
| P50583 | EGHQFLCSIEA  | 22001 | P12314 | GVHRKEPQGAT  | 21979 | P16860 | SGLGCKVLRHH  | 21959 |
| Q15319 | KQKRMKYSVAHV | 22001 | P36959 | RVTQQHNTVFS  | 21979 | P56177 | FKKLMKQGGAA  | 21959 |
| O00472 | EFDQQAESWS   | 22001 | Q14814 | KRMRLDTWTLK  | 21979 | Q99500 | NAALQNGIFCN  | 21959 |
| Q93086 | CPQLLEPHRST  | 22001 | O95263 | KCKSLRLPSDS  | 21978 | O43248 | RLQYFSGNPLL  | 21959 |
| O15142 | RVLEKLGTVTR  | 22000 | P22888 | ALLDKTRYTEC  | 21978 | Q9UPM6 | NRGEKVILFQY  | 21959 |
| P15267 | PLAGNPVSPTS  | 21999 | P32780 | TWQSRRLMKKT  | 21977 | P01303 | PRTRLEDPAW   | 21959 |
| P29400 | ISRCQVCMKRT  | 21999 | P20908 | GFEVGPACFMG  | 21977 | Q99462 | CVRKSQETAFE  | 21959 |
| Q14805 | MPEDVLAERAL  | 21999 | O75909 | AAEPAPSQHLW  | 21977 | Q16394 | LRKKYRDIERL  | 21957 |
| P14780 | VTYDILQCPED  | 21999 | Q13144 | KEAEESSEDD   | 21977 | Q92902 | RLWEASRIPLL  | 21957 |
| Q14929 | SGHHLLPQEVF  | 21999 | P41134 | CVPADDRILCR  | 21977 | P23588 | EDENEGEDYAE  | 21957 |
| P42568 | LQSYLETSGTS  | 21998 | P34969 | TTVEKKVMHID  | 21976 | P53779 | EASAGPLGCCR  | 21957 |
| P35219 | LSDRVIRAAQF  | 21998 | Q9UQ03 | LKNLRNSPKNC  | 21976 | P01777 | SAVWGQGTLLV  | 21956 |
| P49716 | FLPAAGTADCR  | 21998 | Q13115 | LHSPITTSPTSC | 21976 | O95750 | LEAVRSPSFEK  | 21955 |
| O14949 | EQIRIMTVPCPL | 21998 | P21802 | QYPHINGSVKT  | 21976 | Q13304 | NESSLSAKSEL  | 21955 |
| P42024 | DGARISHRKTF  | 21997 | Q02790 | AGSQSQVETEA  | 21976 | P23276 | LLNPSSRCQLW  | 21955 |
| P10911 | MRPVSEMAALLY | 21996 | P43034 | VDQTVKVVWECE | 21976 | Q99759 | LLTHHFAQLMY  | 21955 |
| P12524 | LQKRIAYLSGY  | 21996 | P33032 | FRIACSFPRRD  | 21976 | Q9U195 | LYVEERAHKG   | 21955 |
| P25112 | LESEREARRLR  | 21996 | P09237 | LYGKRSNSRKK  | 21976 | P32930 | GAEEFQEMVHS  | 21955 |
| P30419 | MGAEKVGLVLQ  | 21995 | O00217 | AANIQADYLYR  | 21976 | P00480 | DYSPQLQKPKF  | 21955 |
| P02656 | PEVRPTSAAVA  | 21994 | P49703 | KKAARGGKKRR  | 21975 | P16066 | LLGERGSSTRG  | 21954 |
| P12525 | LQKRIEYLLSY  | 21994 | Q03001 | MTGISSLYSS   | 21975 | P78560 | VDPSLLHMLE   | 21954 |
| P25208 | QISGVQIIFS   | 21993 | O75956 | CLAETERNART  | 21975 | P22894 | RGNKWLNCRYG  | 21954 |
| O04548 | ALYNASQPKNK  | 21993 | P28472 | FNLVYWLYYVN  | 21975 | O00254 | TRNHSTAYLTK  | 21954 |
| O00124 | GDIHLLVRSW   | 21993 | Q99551 | EAKLKKLSRFA  | 21975 | P48443 | MEMLETPLQIT  | 21954 |
| P10451 | HELDASSEVN   | 21993 | P48454 | HRSDQGGKAHS  | 21975 | P29320 | ETQSKNGPVPV  | 21953 |
| O95782 | RHLCELLAQF   | 21992 | Q9Y2Q0 | YDTTKQRPDEW  | 21973 | O15265 | SSLHQPKARP   | 21952 |
| P54646 | MCASLITTLAR  | 21992 | P46055 | GDEFFDLDDY   | 21973 | P27701 | HSEDSKVPKY   | 21952 |
| P32320 | SFGPEDLQKTQ  | 21992 | Q13113 | EEEGKVRSTPM  | 21973 | O14944 | VTSGDPELPQV  | 21951 |
| P00156 | SLIENKMLKWA  | 21992 | Q00987 | PIQMIVLTYFP  | 21973 | O15360 | DADLSQEPHLF  | 21951 |
| P54289 | WLVSGETHRL   | 21991 | Q9ULV4 | KLEQQMAKIAA  | 21972 | P43365 | LHEWAFREGEE  | 21951 |
| P09093 | IDWIEETIASH  | 21990 | Q16626 | LQARQASPAWK  | 21972 | Q16281 | SIGYSDLFCLS  | 21950 |
| P35638 | LIDRMVNLHQA  | 21990 | Q14028 | KMPEEREKAE   | 21971 | P35452 | VVLREQALALY  | 21950 |
| P24666 | RCCRAFLEKHA  | 21990 | P51674 | TRSKERLNAYT  | 21971 | Q14168 | EPQWVPVSWVY  | 21950 |
| P50579 | CKEVVSRGDDY  | 21989 | P04637 | LMFKTEGPDSD  | 21971 | Q01534 | CGAIPCNTTRG  | 21950 |
| P07498 | TTTAVVTPPTA  | 21989 | Q9Y295 | EDEDVIVKIVK  | 21970 | Q9Y2D0 | KPKPATSQATP  | 21949 |
| P16083 | IPCTAHWHFGQ  | 21989 | P23434 | AYEKYIKSIEE  | 21970 | Q15329 | CDLFDVQILNY  | 21949 |
| Q13474 | SDVTANTLLAS  | 21989 | O95168 | GKLDRTFHLSY  | 21970 | P15408 | DSLNSPTLLAL  | 21949 |
| Q9Y5R2 | TYYKRPVQEWV  | 21989 | O95050 | CFIVARKKGP   | 21970 | P80192 | PGGTGSSWGGQ  | 21949 |
| Q15274 | AKEVAPVPKIH  | 21989 | Q15758 | ATVASEKESVM  | 21969 | O43808 | TVMGLKRAHQH  | 21949 |
| P54108 | KASCNCNSIY   | 21988 | P29323 | HKESNDKSCGG  | 21969 | Q13077 | MFLKCIIVETST | 21949 |
| P51671 | YLDQKSWTPKP  | 21988 | P43268 | QPFPGKGGYSY  | 21969 | P01908 | SVGASRHQGPL  | 21948 |
| Q13233 | LLKHVPERTTW  | 21988 | P14151 | KKSRSRMNDPY  | 21969 | O43261 | YQMGDCCKEEI  | 21948 |
| P43362 | EEVLGPEQEGV  | 21988 | P51608 | DSRTPVTERVS  | 21969 | P98170 | VITFKQKIFMS  | 21948 |
| O15350 | IKEEPTEAEIH  | 21988 | P04731 | KGASEKCSCCA  | 21969 | P48449 | LYPERALAGHP  | 21947 |
| P78314 | LRHPYGYTGPR  | 21987 | Q9Y4K1 | TQVWEAMVLYT  | 21968 | P12872 | LSEMLPQHAAK  | 21947 |
| O43747 | EVNNFPFPQSWQ | 21987 | P31371 | PELYKDILSQS  | 21968 | P00966 | YHRLQSKVTAK  | 21946 |
| O15178 | ASWTPVSPSPM  | 21987 | O75627 | LALNIDCDLLG  | 21968 | O00763 | LLSTMDSPTAST | 21946 |
| O43683 | VLLLECKRSRK  | 21987 | Q06413 | KRMRLSEGWAT  | 21968 | Q02318 | KVGLQLQRQC   | 21946 |
| Q13163 | LEERRSQQGGP  | 21987 | O60287 | CKDAASAASDA  | 21968 | P40926 | KKGEDFVKTLK  | 21946 |
| P35658 | SSVQFGGWRS   | 21987 | P17174 | TSIHEAVTKIQ  | 21967 | Q14849 | RQRISLGLARA  | 21946 |
| Q99574 | MNTSGHDFEEL  | 21987 | Q9Y3D8 | WIEQWIKDHNS  | 21967 | P57056 | SHGCESHPIITF | 21945 |
| O15355 | NSDKKKKAKRD  | 21987 | P01040 | DKNKDDELTFG  | 21967 | Q92793 | GDITLEKFVEGL | 21945 |
| P24534 | QSMDDVAFNKI  | 21986 | Q14409 | LIGARYISGIP  | 21967 | Q9UKT8 | GSSFLAGEHPG  | 21945 |
| P13727 | CLRLFPFICSY  | 21986 | P47929 | GDVQLDSVRIF  | 21967 | P11362 | AQLANGGLKRR  | 21945 |
| P38117 | LVAKELIGIRI  | 21986 | P55001 | AASCARSCGSC  | 21967 | O60318 | HLSALLDMVDI  | 21945 |
| O00519 | ERLMTPEKQSS  | 21986 | Q02252 | SPAVVMPTMGR  | 21967 | P21673 | KEYLLKMATEE  | 21944 |
| O60858 | VAEFVCKYKLL  | 21986 | Q9Y2T4 | IFQDKVNSDMH  | 21966 | P51659 | LQMILKDYAKL  | 21944 |
| P33241 | EKVLVEGPGAP  | 21986 | O00115 | MARKPSRAYKI  | 21966 | Q13202 | FSGSVEVIEVS  | 21944 |
| O15525 | TIVKSKTDARS  | 21986 | P43361 | IWEALSVMGAV  | 21966 | P30793 | TREEFTLIRS   | 21944 |
| P28039 | IKQVFGDQGGH  | 21985 | P10323 | TTPELTSTST   | 21965 | P51888 | MCFRLQSVVI   | 21943 |
| P41181 | SPQSLPRGTKA  | 21985 | Q03154 | LASVPALPSDS  | 21965 | P26437 | LDWLSHELKSR  | 21942 |
| P55061 | MNEKDKKEKK   | 21985 | P78540 | DESENQARVRI  | 21965 | Q13370 | IQVIEADEEEE  | 21942 |
| Q16553 | SLLPALLRFGP  | 21985 | P98196 | MLSQTSSSLSF  | 21965 | P01031 | EFAEDIFLNGC  | 21942 |
| P31153 | FPWEVPKCLKY  | 21985 | P39748 | TGAAGKFKRKG  | 21965 | Q9U1V8 | SILFFGRFSSP  | 21942 |
| P29558 | DHSPYTFQPNK  | 21985 | Q12952 | RRRKRKPKPGP  | 21965 | P30990 | PYLKRDYSYY   | 21942 |
| Q16625 | KMVGDDYDRQKT | 21985 | O95968 | TLGKIAEKCDR  | 21965 | P49591 | NRLQNMVETDA  | 21942 |
| P36955 | FIGKILDRPGP  | 21985 | Q15759 | PKPPGSLIEIQ  | 21965 | Q99972 | MVTYDIKLSKM  | 21941 |
| O75106 | PDLPPFSYHGF  | 21984 | P11217 | RQRLPAPDEAI  | 21965 | P09923 | TLLLLGASAAP  | 21941 |
| Q16568 | TSCNSFLKCL   | 21984 | Q99965 | EQPESESEPKG  | 21964 | P54253 | ICIEGRSNVKG  | 21940 |
| Q92915 | GKGPVNNKSTT  | 21984 | Q13886 | KRSKKALANAL  | 21964 | Q15699 | KEHTANISWAM  | 21940 |
| Q9Y483 | YLVEWEGATAS  | 21984 | P11509 | PRNYTMSFLPR  | 21964 | P15311 | TKQRIDEFEAL  | 21940 |
| Q92569 | PVHAQMPSLCR  | 21984 | P06858 | CHDKSLNKKSG  | 21964 | Q93008 | EEVSPPTQKDK  | 21940 |
| P15309 | NSHQGTEDSTD  | 21984 | Q13296 | LIYDSSLCDLF  | 21964 | Q13361 | ENVDLQRPNGL  | 21940 |
| Q16820 | RPNLTQNHAF   | 21983 | Q02505 | TSSMTTETTS   | 21964 | Q9Y6C7 | DELTSGLLAT   | 21940 |
| P01036 | MSLVNSRCQEA  | 21982 | P80723 | ANSDQTVTVKE  | 21963 | P01889 | SAQGSVDLSLA  | 21939 |
| O60610 | EEAKELVGRAS  | 21981 | P49961 | HKPSYFWKDMV  | 21963 | P11171 | VVHQETETIADE | 21939 |
| P04720 | TKSAQKAKAK   | 21981 | Q92523 | ADLFQVPKAYS  | 21962 | P50052 | SSLREMETFVS  | 21939 |
| Q92636 | DRQIIFWKLQY  | 21981 | P08637 | KFKWKRKDPQDK | 21962 | Q02832 | EVPGRRPPLLHS | 21939 |
| P24844 | ILKHGAKDKHD  | 21981 | Q9UBU8 | VAPPEYHRKAV  | 21962 | O15520 | SAHFLPMVVHS  | 21939 |
| P11117 | YRHVADGEDHA  | 21981 | P41586 | MSGLPADNLAT  | 21962 | P07098 | DIVSMISEDKK  | 21939 |
| Q9UKJ3 | QDLQHPSPSHGT | 21981 | P49407 | DGTGSPRLNDR  | 21961 | O60361 | YKSCAHDWVYE  | 21939 |
| Q9UM01 | EMPKQMDPSKSN | 21981 | P14735 | KPHINFMMAAKL | 21961 | P51003 | KRTHSPHKEES  | 21939 |
| O15264 | KDSRRRSRGMKL | 21980 | P41236 | SDQQQKNLRSS  | 21961 | P23471 | GNIAESLESILV | 21939 |
| Q99546 | SGLPPSESGPW  | 21980 | O00182 | GGDIQLTHVQT  | 21961 | P23141 | EKPPQTEHIEL  | 21938 |
| P23526 | DGPFKPDHYRY  | 21980 | P25963 | DCVFGGQRLTL  | 21961 | P29275 | AGVQPALGVGL  | 21937 |
| P40617 | RKMLRQKKKKR  | 21979 | P56559 | RRKSLQKKKKR  | 21960 | Q01432 | MKSEETALTN   | 21937 |
| O76075 | LKRKQPVRRKQ  | 21979 | O95255 | FYRLAQESGLV  | 21960 | Q99217 | STDKTKREEVD  | 21937 |

ID: ID from Uniprot Database (<http://www.uniprot.org/>) Sequence: Listed sequences match the Uniprot ID, but for the array experiments and for the computational predictions, the cysteines were changed to serine. NA: not available. BLU: biochemical light unit.

Table S1: Binding data from CAL peptide array.

| ID     | Sequence     | BLU   | ID     | Sequence     | BLU   | ID     | Sequence      | BLU   |
|--------|--------------|-------|--------|--------------|-------|--------|---------------|-------|
| Q9Y305 | ATLRKDYLVPE  | 21937 | O15218 | PISPTQPLTPS  | 21914 | O43921 | TIPVLWTLTLLGS | 21889 |
| P26641 | GKAFNQGKIFK  | 21937 | P46736 | EELMQELSSLE  | 21914 | P56851 | SIVAWTGMLIA   | 21889 |
| P39060 | CIENSFMTASK  | 21936 | Q92185 | PCEDTSLQPTS  | 21914 | P14207 | LALMLQLWLLG   | 21889 |
| Q13437 | LEKHGYKMETs  | 21936 | Q16280 | SLGYSDFLCLS  | 21914 | Q02535 | VISNDKRSFCH   | 21889 |
| P43243 | LAEEERRQKKET | 21936 | Q13166 | LAIMWFGTNTN  | 21914 | P48730 | ASSGLQSVVHR   | 21889 |
| Q13635 | CEERPRGSSSN  | 21936 | P40145 | QAEGTDKSDLP  | 21914 | Q15784 | MYEELNAFFHN   | 21889 |
| P31947 | EGGEAPQEPQS  | 21935 | P07992 | DVLHEPFLKVP  | 21914 | P31946 | GDEGDAGEGEN   | 21888 |
| Q13412 | CTSWYCKVKMS  | 21935 | Q06828 | LCLRLASLIEI  | 21914 | O14791 | NYKILQADQEL   | 21888 |
| P35251 | PRKGKGGKSSK  | 21935 | Q9U117 | RLQKKGGKDKT  | 21914 | P07384 | LFKWLQLTMFA   | 21888 |
| P56645 | SFIIGRHKVRT  | 21935 | Q9NYK5 | QSKATEECTST  | 21914 | P00403 | KIFEMGPFVFTL  | 21888 |
| P28288 | QITEDTVEFGS  | 21934 | P05814 | PLAPVHNPISV  | 21912 | P30043 | GHSTYPSHQYQ   | 21887 |
| P00374 | KYKFEVYEKND  | 21934 | O75454 | LFLEMLEAKVC  | 21912 | Q13562 | MSAQLNAIFHD   | 21887 |
| P13378 | AQELEEDRAEA  | 21934 | P50152 | PFKEKGSCVIS  | 21912 | P28336 | NGHSMKQEMAM   | 21887 |
| P55344 | VHECRRLSTPR  | 21934 | P09238 | HILKSNSWLHC  | 21912 | Q15113 | SQPVRAAASQD   | 21887 |
| P56643 | NTLSYFQSLIK  | 21934 | P49238 | HTSDGDALLLL  | 21911 | Q9UFM2 | PARLDGQGLAS   | 21886 |
| O43614 | AANGAGPLQNW  | 21934 | P30279 | STPTDVRDIDL  | 21911 | P27797 | EDVPGQAKDEL   | 21885 |
| P56817 | DDFADDISLLK  | 21933 | P10588 | STFNWPYGSQ   | 21911 | P43004 | SVVEEPWKREK   | 21885 |
| Q12837 | KQKRMKYSAGI  | 21933 | Q92837 | RTGDGVLVPGS  | 21911 | P22087 | GVYRPPPKVKKN  | 21885 |
| P02675 | SMKIRFFFPQQ  | 21933 | Q13322 | KLKHHHCIRVAL | 21911 | P16144 | STHMDQQFFQT   | 21885 |
| P08195 | EGLLLRFPYAA  | 21932 | Q99732 | QTPEIAAWSRA  | 21911 | P10253 | LMGEQFLVSWC   | 21885 |
| O00192 | DAKPQPVDSWV  | 21932 | Q92882 | AEDYLDDEDS   | 21911 | O14684 | LQILWEAARHL   | 21885 |
| Q14565 | ITAGGIGDAKE  | 21932 | Q16548 | CEMLSLLLKQYC | 21910 | P30499 | GSDESLASKA    | 21884 |
| Q92914 | PEASPSPPAP   | 21932 | O15394 | IIQSKEDDSKA  | 21910 | P13073 | KWDYKNEWKK    | 21884 |
| O15117 | DIADGCIYDND  | 21932 | P12644 | QEMVVEGCGCR  | 21909 | O43602 | LDDSDSLGDSM   | 21884 |
| P36639 | LDYTLREVDTV  | 21931 | Q99595 | SSPFGDYRQYQ  | 21909 | P06899 | TKAVTKYTSK    | 21884 |
| P36544 | NFVEAVSKDFA  | 21931 | Q16819 | IIAILSQRPKR  | 21909 | P10073 | FSSTHLVQHW    | 21884 |
| P18859 | PKFEVIEKPQA  | 21931 | P15907 | ATLPGFRTIHC  | 21908 | P98164 | TANLVKEDSEV   | 21884 |
| P43146 | KQLNALQYSFA  | 21931 | O43497 | GLSSDPADLDP  | 21908 | P16284 | YSRTEGSLDGT   | 21884 |
| P15941 | NPAVAASANL   | 21931 | O43323 | LLYRLAEELLG  | 21908 | P42655 | EALQDVEDENQ   | 21883 |
| O75056 | QKPKDKEEFYA  | 21931 | P31277 | RLQYFTGNPLF  | 21908 | P31152 | ALHQARGPAGQ   | 21883 |
| Q07699 | KENCTGVQVAE  | 21930 | O00767 | KRTGDGNYKSG  | 21907 | Q04725 | DKKATVYEVVY   | 21883 |
| P01034 | MTLSKSTCQDA  | 21930 | Q15646 | KKKGALFPAS   | 21906 | P11310 | VAREHIDKYKN   | 21882 |
| Q15910 | YVGIEREMEIP  | 21930 | P35250 | LCQKTMAPVAS  | 21906 | P17213 | FLLFGADVYK    | 21882 |
| P21589 | SLWAVIFVLYQ  | 21929 | O43184 | VPRSTHTAYIK  | 21906 | P17538 | IPWVQKILAN    | 21882 |
| O95447 | SPTEGKRKIII  | 21929 | O60755 | VHGGEAARGPE  | 21906 | Q14397 | DPLEILEPVDQ   | 21882 |
| Q05469 | AGVDGGCGGRH  | 21929 | O15403 | EHRVHVQMEPV  | 21906 | P81172 | HRSKCGMCKCT   | 21882 |
| Q00325 | ESLKKKLGLTQ  | 21929 | P20138 | TSTEYSEVRTQ  | 21905 | P01222 | PQKSYLVGFSV   | 21882 |
| P05186 | ALALYPLSVLF  | 21929 | O75461 | QQSEELLEVS   | 21905 | P11475 | KLFLMLEAKV    | 21881 |
| P01008 | FMGRVANPCVK  | 21928 | P13662 | DMFRLALHNFG  | 21905 | Q14642 | HAHVHKCCVVQ   | 21881 |
| P05160 | STLSYQEPLRT  | 21928 | Q06278 | PGSYVPWNVPI  | 21904 | O75556 | YDSIWCNMKSN   | 21881 |
| Q13002 | DRRLPGKETMA  | 21928 | P29972 | DINSRVEMKPK  | 21904 | P55058 | STAPTPTAAV    | 21881 |
| O00158 | SNPLLPDQKVC  | 21928 | P55039 | EHEDEVIVKIK  | 21904 | P22695 | NLGHPTFPVDL   | 21880 |
| P17342 | EDSRSHFSVA   | 21927 | P34741 | YQKAPTKEFYA  | 21904 | P10109 | ARQSIDVGKTS   | 21879 |
| P15085 | TIMEHSLNHPY  | 21927 | P41968 | ILCGNGMNLG   | 21903 | Q99502 | ALHHALELEYL   | 21879 |
| P22794 | GTEKLTNKGIG  | 21927 | P15173 | SVAFPDETMPN  | 21903 | P28358 | IRELTANLTFS   | 21879 |
| O75896 | HVDFPVILYEV  | 21927 | Q14591 | QRSDLVKHQR   | 21903 | P56597 | LCHHPIVEEPPY  | 21879 |
| P27544 | LRNLVDLKRFR  | 21927 | P12236 | LVLYDELKKVI  | 21902 | P40937 | QVTRDLIVAEA   | 21878 |
| Q9U154 | KLVTLSNLYNK  | 21927 | P10915 | LYGVYCFRAYN  | 21902 | P81408 | SLNGGSRETGL   | 21878 |
| O14658 | VKKPGKKCTVF  | 21927 | Q9Y3F4 | CIFPSAPDVKA  | 21902 | Q00013 | SPQWVPSVSWVY  | 21878 |
| P49640 | LDQREEVPLTR  | 21926 | P28908 | EDPLPTAASGK  | 21901 | P31273 | WKKENNKDKLP   | 21878 |
| P48169 | KDTMEKSESML  | 21926 | Q9UBA6 | SWREALYGCHA  | 21901 | Q12968 | ESLDLGRSDGL   | 21878 |
| Q15185 | DSDDKMPDLE   | 21926 | P33981 | SKTFEKKRGKK  | 21901 | Q13951 | LAVTGKKTTRP   | 21878 |
| O75688 | DAGTKMSGEKI  | 21926 | P20172 | IGRSGIYETRC  | 21900 | P01011 | FMSKVTNPKQA   | 21877 |
| P01160 | GLGCNSFRYR   | 21925 | P13804 | VPEMTEILKKK  | 21900 | Q14488 | GLSVDRLVNGE   | 21877 |
| P20290 | NFDEASKNEAN  | 21925 | O43763 | AASVSGLASVV  | 21900 | P43364 | EDALREEGEGV   | 21877 |
| P56747 | GPSEYPTKNYV  | 21925 | P20142 | GNNRVGFATAA  | 21900 | Q92832 | CSVDFECLQNN   | 21877 |
| P16930 | AGKVLPAALLS  | 21925 | P00695 | DVRQYVQGCGV  | 21899 | Q99471 | ALGAAQATAKA   | 21877 |
| Q99795 | TGRESPDHLQ   | 21924 | O15496 | FLCEPDSPKCD  | 21899 | P00918 | LKNRQIKASF    | 21876 |
| P18085 | LDWLNSLESKR  | 21924 | Q9UHM2 | LGKFISTVHPI  | 21898 | P07332 | QELQSIKRHR    | 21876 |
| Q13495 | GTEIRSYGNDP  | 21924 | P30533 | GRISRARHNEL  | 21898 | P55198 | DKGASANQKEG   | 21875 |
| Q05639 | KSAQKAKGKAG  | 21924 | P42772 | VAGYLRATG    | 21898 | Q02080 | SLQASSEKTQQ   | 21875 |
| O00501 | ATGDYDKKNYV  | 21923 | Q16595 | LSSSLAYSGKDA | 21898 | O95677 | ALHQALELEYL   | 21874 |
| P20711 | LAADVLRAERE  | 21923 | P01760 | QGTTLTVSSGS  | 21898 | Q01469 | VTCTRIYEKVE   | 21874 |
| P12955 | DKAFTPFSGPK  | 21923 | Q02078 | VKRMRMDAWVT  | 21898 | Q13461 | PGFASGLERYL   | 21874 |
| O95219 | WTNAKECFSKM  | 21923 | P35542 | RFRPDGLPKKY  | 21898 | P54802 | KYYPGWVAGSW   | 21873 |
| P49748 | GGVVTNSPLGF  | 21922 | P55197 | SPSMEIMQVRK  | 21897 | Q29459 | ETPEEKQTTIA   | 21873 |
| Q08828 | YLPASAAAGKEA | 21922 | P53680 | LKQLLMLQSLE  | 21897 | P17735 | CAEGSQEEDCK   | 21872 |
| Q02978 | NKAYKRLFLSG  | 21922 | P41161 | SSLPYAEQFAY  | 21897 | P43490 | QLNIELEAAHH   | 21872 |
| P14060 | RHKETLKSQTQ  | 21921 | P03372 | TGEAEGFPATV  | 21897 | Q99715 | PYNGQSYPGSG   | 21871 |
| P20963 | DALHMQALPPR  | 21920 | O60925 | IREMLMARRAQ  | 21896 | P07358 | SGPASETLDCS   | 21871 |
| O95178 | EELGIPDDDED  | 21920 | Q12972 | PGKKKPTPSLLI | 21896 | Q01543 | THVPSHLGSYY   | 21871 |
| Q92696 | ELLPSVSSVLT  | 21920 | P56202 | PDMKPRVSCPP  | 21895 | Q14623 | FHPLGMSGAGS   | 21871 |
| P40933 | VHIVQMFINTS  | 21919 | Q01094 | CDFGDLTPLDF  | 21895 | P22234 | QADKKIRECNL   | 21871 |
| P21912 | MATYKEKKASV  | 21918 | P41212 | LDEQIYQEDEC  | 21895 | Q12888 | HPKYKHXYVSH   | 21870 |
| Q03468 | EGIWKLKPEYC  | 21918 | P78334 | NVLYWLVLNL   | 21895 | P02590 | DEFLEFMKGVE   | 21870 |
| P08590 | YEAFFVKHIMSS | 21918 | P22760 | NQYIEWLKENL  | 21894 | P54107 | KATCLCDTEIK   | 21869 |
| Q14554 | HERLGKKKEEL  | 21918 | O14561 | DYIADKKDVYE  | 21894 | P06132 | VHKHSRLLRQN   | 21869 |
| O15534 | PALPTAGNCTS  | 21918 | P17509 | SAEEEEEEKQAE | 21894 | Q13422 | ITRGEHRFHMS   | 21869 |
| P48357 | IMENKMCMLDTV | 21917 | P15514 | RQENGNVHAI   | 21893 | P14784 | ELQGGQDPTHLV  | 21869 |
| Q06787 | DGQQMLVGVGP  | 21916 | P54764 | MQQMNGHGMVVP | 21893 | O15553 | TICPVGGQGP    | 21869 |
| Q92859 | LMKDLNAITTA  | 21916 | Q00587 | ADAEEDDEVKV  | 21893 | P20023 | VYSVDFPNPAS   | 21868 |
| P07311 | KLDYSDFQIVK  | 21915 | P15803 | YAYIYCLCAAV  | 21892 | P47870 | FNIVYWLYYVN   | 21868 |
| P02652 | FVELGTQPATQ  | 21915 | P51948 | DAFSGFLWFQPS | 21892 | P10720 | YKKIIEKHLES   | 21868 |
| P29973 | PGAESGPIDST  | 21915 | P19875 | IEKMLKNGKSN  | 21892 | P17927 | QTNEENSRLVP   | 21867 |
| Q15828 | SQLLKHNCVQM  | 21915 | P14555 | NKMLCRGSTPRC | 21892 | Q99766 | VLLIENADDLQ   | 21866 |
| P28562 | LQSPITTSFSC  | 21915 | P40424 | GPGSVHSDTSN  | 21892 | Q92912 | NGGKVVNQDST   | 21866 |
| P15328 | SLALMLLWLLS  | 21915 | P49736 | DLKRKMILQQF  | 21891 | P04901 | GSWDSFLKIWN   | 21866 |
| Q12767 | FETKLGMSNPF  | 21915 | P56373 | STDGSAFSIGH  | 21891 | P49755 | RRFFKAKKLIE   | 21866 |

**ID:** ID from Uniprot Database (<http://www.uniprot.org/>) **Sequence:** Listed sequences match the Uniprot ID, but for the array experiments and for the computational predictions, the cysteines were changed to serine. **NA:** not available. **BLU:** biochemical light unit.

Table S1: Binding data from CAL peptide array.

| ID     | Sequence     | BLU   | ID     | Sequence     | BLU   | ID     | Sequence     | BLU   |
|--------|--------------|-------|--------|--------------|-------|--------|--------------|-------|
| Q09428 | SVFASFVRADK  | 21865 | Q9UPW0 | IQDDFDWDSIV  | 21837 | P11388 | YLESEDEDDL   | 21812 |
| P18849 | KEKLEFILAAH  | 21865 | P30500 | GSDESLIACKA  | 21836 | P50553 | EQELLDFTNWF  | 21811 |
| O75503 | LPIRNTKLSGL  | 21865 | P54619 | ALVLTGGEKKP  | 21836 | P35520 | NFVAAQERDQK  | 21811 |
| O15516 | SLPDPKSKVQPQ | 21865 | P46100 | KNPGPSQGKSM  | 21836 | P54198 | CQEQLDILRDK  | 21811 |
| O95741 | CTLATTPSPSP  | 21865 | Q13410 | LIPQTQPSQGAP | 21836 | P55318 | GLYSRSLNLS   | 21811 |
| P25391 | VFLHSCPGTES  | 21865 | Q13066 | TPEEGEKQSQC  | 21836 | Q9UHI8 | FIDFCTMAECS  | 21810 |
| P54793 | VSQPRGPNEKR  | 21864 | Q13588 | FPRSYVQPVHL  | 21836 | Q13956 | ELHELAQFGII  | 21810 |
| P04839 | GVHFIFNKENF  | 21864 | P05015 | TNLQKGLRRKD  | 21836 | Q16539 | PPPLDQEEMES  | 21810 |
| P02750 | GQTLLAVAKSQ  | 21863 | P07237 | DDQKAVKDEL   | 21836 | P22455 | SSFPFGSGVQT  | 21809 |
| Q15822 | LFLPPFLAGMI  | 21863 | P16455 | ATSGSPAPGRN  | 21835 | P02679 | HLGGAKQAGDV  | 21809 |
| P00395 | HTFEPEVYMK   | 21863 | P01890 | VQHEGLPKPLT  | 21834 | P51993 | YQTRGIAAWFT  | 21808 |
| O43909 | PHDKTKCFKFI  | 21863 | P47710 | NYEKNNVMLQW  | 21834 | P19086 | IQNNLKYIGLC  | 21808 |
| P36969 | LVIEKDLPHYF  | 21863 | P41970 | PVLLSSNSQKS  | 21834 | Q02809 | TRYIAVSFVDP  | 21808 |
| P50550 | VRAQAKKFAPS  | 21863 | P53674 | SFPVLATEPPK  | 21833 | Q75493 | RLHVDGVPHGR  | 21807 |
| Q99726 | QCLRCQEPQPA  | 21863 | P30101 | PKKKKKKAQEDL | 21833 | P25090 | SPPAETELQAM  | 21807 |
| O15055 | RTPKTKMDPP   | 21862 | P54136 | DTLGKPGPRV   | 21833 | P98160 | QAGANTRPCPS  | 21807 |
| O00168 | SSIRRLSTRRR  | 21862 | P12235 | LVLYDEIKKYV  | 21832 | P54826 | SILLLLGLPLF  | 21806 |
| Q15172 | MHSILNSTSAE  | 21861 | Q03828 | PDQRDEAPLTR  | 21832 | P07357 | CPGRKVQTQAC  | 21805 |
| P37268 | VTEDYVQTGEH  | 21860 | P56378 | LKASAPAGHH   | 21831 | P04765 | EEMPLNVADLI  | 21805 |
| P05230 | ILFLPLPVSSD  | 21860 | P27540 | PDLTMFPPFSE  | 21831 | Q02575 | YISYLNHVLVD  | 21804 |
| P18858 | EDSGSDPEDTY  | 21858 | P13498 | VNPPIVTDEVV  | 21831 | Q92482 | KLAVHKHKEQI  | 21803 |
| P49916 | CIRKRLVAPC   | 21858 | O43364 | LTTIDLQHLNY  | 21831 | O15551 | LGTGYDRKDYV  | 21803 |
| P35225 | LKKLFREGFRN  | 21858 | Q13232 | WEDSAGHWLYE  | 21831 | P02763 | EKERKQEEGES  | 21802 |
| Q14376 | KQNPSGFGTQA  | 21857 | Q13519 | RRRTLHQNQNV  | 21831 | P11802 | SYLHKDEGNPE  | 21802 |
| Q01113 | SVLSKARSWTF  | 21857 | P51955 | QLKSRQILGMR  | 21830 | P13584 | HLKPLPGSGSK  | 21802 |
| Q13131 | RLYVGPEVDLW  | 21856 | Q9Y2G5 | SGHFHTVCLLV  | 21830 | P11518 | AKAKELATKLG  | 21802 |
| P40616 | EWLVETMLKSRQ | 21856 | P43652 | CFNEESPKNIG  | 21829 | P20848 | FIGKVVNPTQK  | 21801 |
| P56179 | HQDTPMRPQMM  | 21856 | O15392 | RRAIQLAAMD   | 21829 | P53611 | QRVNVQPELVS  | 21801 |
| P52803 | LLFLLAMLLTL  | 21856 | P48052 | AIMEHVDRHPY  | 21829 | P49763 | CHLCGDAVPRR  | 21801 |
| P14384 | FLVSLLIHFFK  | 21855 | Q99829 | SAKDPAQAPQA  | 21828 | Q01955 | SRCQVCMKKRH  | 21800 |
| P08243 | TLTHYKSAVKA  | 21854 | Q01151 | GLVTPHKTEL   | 21827 | Q16790 | YRPAEVAETGA  | 21800 |
| Q16828 | NVYQVDSLQST  | 21854 | P06734 | RLTPTASPLHS  | 21827 | P06681 | HLGDVNLFLPL  | 21799 |
| Q02779 | TVPLCGAHGSH  | 21854 | P30740 | SILFLGRFSSP  | 21827 | P20930 | RGGRQGYHHEQ  | 21799 |
| P15531 | YTSCAQNWIEY  | 21854 | P32881 | INLQKRLKSKE  | 21827 | P14672 | ELEYLGPDEND  | 21799 |
| Q99406 | IQQKEKCVQTS  | 21854 | O15479 | EALKDEEKAGV  | 21827 | Q16849 | EVNAILKALPQ  | 21799 |
| P06727 | EQVQMLAPLES  | 21853 | P22001 | CVNIKKIFTDV  | 21826 | Q04917 | DQQDEEAGEGN  | 21798 |
| Q06187 | SNILDVMDDES  | 21853 | P54756 | KVQLVNGMVPL  | 21826 | P04054 | KNLDTKKYCQS  | 21798 |
| Q99549 | DENSGEGFGL   | 21853 | Q9UBL9 | TPTDPKGLAQL  | 21826 | P23470 | SDPAESMESLV  | 21798 |
| Q13438 | EGTGDLDEFDF  | 21853 | Q16781 | AWTRLYAMNNI  | 21826 | P54105 | AGQFEDADVHD  | 21797 |
| P43307 | RAQKRSVGSDE  | 21853 | Q16206 | KFCGFEGKLTL  | 21825 | Q99613 | GYRQQSQQTAY  | 21797 |
| P14927 | ERKEREWEAKK  | 21853 | Q03181 | PLLQEIYKDMY  | 21825 | O00746 | DGGQHSIIHPA  | 21797 |
| P54753 | LQMNQTLPVQV  | 21852 | O60268 | LSDHIEQMATE  | 21825 | P51805 | EQIISLVSSDS  | 21797 |
| Q14696 | ENRAGNKREDL  | 21852 | P13942 | GVLGPGVCFMG  | 21824 | Q01851 | KQKRMKFSATY  | 21796 |
| O60678 | LNNSTQTYGLQ  | 21851 | P49917 | CELQEENQYLI  | 21824 | P09769 | AEPQYQPGDQT  | 21796 |
| P19784 | AVLSSGLTAAR  | 21851 | P28324 | PGFPSPDLQKT  | 21824 | P01815 | WGRGTPVTVSS  | 21796 |
| Q92886 | LHTTPCFPIYH  | 21851 | P01215 | CHCSTCYHKS   | 21824 | O14933 | FTLRFGVDRPS  | 21796 |
| O00591 | NVIFYWAYMYF  | 21850 | Q9NR22 | ETSVSNNDYKMR | 21823 | O60829 | AKTKEAGDGQP  | 21795 |
| Q9NR09 | SSKELPSDFQL  | 21849 | O60939 | DGEGNPDDGAK  | 21823 | P08107 | SGSGPTIEEVD  | 21795 |
| P02790 | QNVTSLLGCTH  | 21849 | Q9UBL6 | PAGEASPGCTP  | 21823 | Q15904 | KGPTISLTQIV  | 21795 |
| P02786 | SGDVWDIDNEF  | 21849 | P07900 | DDDTSRMEEVD  | 21823 | P17948 | NSVVLSTPPI   | 21795 |
| P06307 | RRSAEEYEPYS  | 21848 | Q92913 | GGKSMHNEST   | 21822 | Q9Y2Z9 | LKEQIMAFASK  | 21794 |
| P56880 | NNSTHNLKDYV  | 21848 | Q99571 | YEQGLASELDQ  | 21822 | O95622 | AMIAKMNRQRT  | 21794 |
| P52797 | IAFFLMTQFLS  | 21848 | P35462 | FRKAFLKILSC  | 21821 | P04632 | IQEWLQLTMY   | 21793 |
| P51956 | KRAGVQGLCLDR | 21848 | P17568 | GPGEVDPKVAL  | 21821 | O43525 | DSVWTPSNKPI  | 21793 |
| P28330 | ELIAREIVFDK  | 21847 | P25101 | TDRSSHKDSMN  | 21820 | P14324 | GLARKIYKRRK  | 21793 |
| P10909 | LQEYRKHKREE  | 21847 | P00439 | GILCSALQKIK  | 21820 | P05111 | PNLLTQHCACI  | 21793 |
| P02511 | EKPAVTAAPKK  | 21847 | P18848 | VRKARGKKRVP  | 21819 | P55103 | PDMVVEACGCS  | 21793 |
| P06241 | TEPQYQPGENL  | 21846 | P78543 | PSKNYVMAVSS  | 21819 | P47712 | FNKEFLSKPKA  | 21793 |
| O43865 | NGPFKPNYYRY  | 21846 | Q07092 | PPMKTMKGPF   | 21819 | P35238 | PIKRGSRSCIL  | 21793 |
| P02741 | GEVFHTKPLWP  | 21845 | P03950 | VHLDQSFIFRP  | 21818 | P40938 | FMEDGLEGMMF  | 21792 |
| P52569 | PFIFHEKTESE  | 21845 | P39059 | IENSFMTDARK  | 21818 | O43488 | LVAHECPNYFR  | 21792 |
| O95757 | HTKSSGEMEVD  | 21845 | P52943 | YDRDPEGKVQP  | 21818 | Q99075 | EKVKLGMTNSH  | 21792 |
| P39687 | REPDEGEDDD   | 21845 | Q01844 | EHRQERRDRPY  | 21818 | P01779 | FDVWGGQTKVS  | 21792 |
| P07360 | DQFHVLDVRR   | 21844 | P30307 | QIALLVKDMSP  | 21818 | Q03405 | ARLWGGTLLWT  | 21790 |
| P49585 | AAVDISEDEED  | 21844 | P46952 | TQDPACKKPLG  | 21817 | P05141 | LVLYDEIKKYT  | 21789 |
| P28067 | IIFYRKPCSGD  | 21844 | P00736 | DWIKKEMEED   | 21817 | P51679 | STMDHDLHDAL  | 21789 |
| Q9Y689 | LEWMMRSRLKIR | 21843 | P01922 | SVSTVLTSTKYR | 21817 | P43026 | EDMVVESCGR   | 21789 |
| Q15173 | TPQVMAASGGQS | 21842 | P01282 | ESPDPFEELEK  | 21817 | P02743 | GYVIKPLVWV   | 21789 |
| P52298 | RGGYGKLAQNG  | 21842 | Q99622 | GPAAGGSVAAS  | 21816 | P01814 | WGKGTTVTVSS  | 21788 |
| P10916 | VHIITHGEEKD  | 21842 | Q15084 | VELDDLKDEL   | 21816 | P42785 | RDFYDSAGKQH  | 21788 |
| P53384 | HQSKEENLISS  | 21842 | P55317 | GVYSRPLVNTS  | 21816 | O00469 | TRYIAVSFIDP  | 21788 |
| Q13472 | GHTRPFCPQNR  | 21842 | P35527 | YGGGSGKSSHS  | 21816 | Q12947 | SVCQDIKPCVM  | 21787 |
| O43914 | SDLNTQRPYYK  | 21842 | Q11206 | EMGAIKNLTFS  | 21815 | Q92520 | EMEGCIPQKQD  | 21787 |
| P49789 | AEAAALRYFYFQ | 21841 | P55786 | LLQRKASPTTV  | 21815 | Q9NQP4 | GSNINLEADES  | 21787 |
| Q16512 | FLDDFDVAGGC  | 21841 | P10966 | ARLRFMKQFYK  | 21814 | P73287 | GGENNEISETR  | 21787 |
| P08123 | FFVDIGPVCFK  | 21840 | O00507 | EEVSSPMQMDQ  | 21814 | Q93091 | KLVPVHLSIL   | 21787 |
| P42081 | TSSCDKSDTCF  | 21840 | P41440 | LPSDGVQNVNQ  | 21814 | Q00610 | GQPQPGFGYSM  | 21786 |
| Q92731 | SKEGSQNPQSQ  | 21840 | O95837 | RLNLREFNLV   | 21814 | Q13085 | RLNSTMDSPT   | 21786 |
| P27539 | EDMVVDECGR   | 21840 | P31930 | RIRSGMFWLRF  | 21814 | Q92599 | QPLRKDKDKKN  | 21786 |
| P35558 | ILALKQRISQM  | 21840 | P27348 | EECDAEGAEN   | 21813 | P50747 | MLRNLLPKRR   | 21785 |
| P07711 | GIASASYPTV   | 21839 | Q9Y426 | TMNGAPVEPCT  | 21813 | Q9Y3C8 | GVIQHKKECNQ  | 21785 |
| Q16829 | NLFPLNTLEST  | 21839 | P00915 | PLKGRTVIRAS  | 21813 | Q12946 | VTYQDIKPCVM  | 21785 |
| O43247 | ASVLSPSLSLG  | 21838 | P46108 | LDQGNPDEDFS  | 21813 | Q16401 | PVSTTAVEGAE  | 21785 |
| P04541 | EAQGEAAKSES  | 21838 | Q9UN99 | DDHDGGEGNNN  | 21812 | P46098 | LVMLWSIWQYA  | 21784 |
| P04198 | LLKKIEHARTC  | 21838 | Q99933 | RLSTNFALAE   | 21812 | P20941 | EHTKIEEEDVE  | 21784 |
| Q13033 | AGADALSTKFFV | 21838 | Q99626 | TGGVNLNPTVTQ | 21812 | P18440 | VPKHGDRFFFTI | 21783 |
| O95674 | KGMLTSTTEDE  | 21837 | O00716 | KLPLVEDFMCS  | 21812 | Q14259 | LLRQAQQAQAGK | 21783 |
| P54803 | QFDNFLVEATR  | 21837 | P12273 | RFYTIIEILKVE | 21812 | P53370 | HTTPTISRVAR  | 21783 |

ID: ID from Uniprot Database (<http://www.uniprot.org/>) Sequence: Listed sequences match the Uniprot ID, but for the array experiments and for the computational predictions, the cysteines were changed to serine. NA: not available. BLU: biochemical light unit.

Table S1: Binding data from CAL peptide array.

| ID     | Sequence     | BLU   | ID     | Sequence     | BLU   | ID     | Sequence     | BLU   |
|--------|--------------|-------|--------|--------------|-------|--------|--------------|-------|
| P02489 | REEKPTSAFSS  | 21782 | Q02548 | PFAAATAYDRH  | 21748 | P51857 | DHPEYPFHDEY  | 21720 |
| P29312 | DEAEAGEGGEN  | 21780 | Q92620 | APRRTPARFGL  | 21748 | Q07001 | YSYNVQDKRFI  | 21720 |
| Q07817 | VVLLGSLFSRK  | 21780 | P32239 | SYTTISTLPGG  | 21747 | Q13609 | TLRKKTKSKRS  | 21720 |
| Q13895 | KGFGRTPRPWR  | 21780 | O15522 | LASPALVSWNW  | 21747 | O14975 | YNAISAKTLKL  | 21720 |
| Q12830 | CVANPENLHLWL | 21780 | O76031 | GWPRQADAANS  | 21746 | P40123 | KLITEPAEIMA  | 21719 |
| Q9UJU5 | AAAAQAKWPAQ  | 21780 | P01350 | DFGRRSAEDEN  | 21746 | P55211 | FLRKKLFFKTS  | 21719 |
| O75385 | RLSALLTGICA  | 21780 | P82094 | QIDELLRQSL   | 21746 | O00292 | RRLQHRPWCIH  | 21719 |
| Q01433 | EAGITMSPGPQ  | 21779 | O43716 | KLDEQEPFPHS  | 21745 | O43715 | GHGKEKPENSS  | 21718 |
| O43684 | DAETKPKSPCT  | 21778 | P20749 | PVPPSPAPGGS  | 21745 | O60733 | FQKLIQLLLSP  | 21718 |
| P16422 | EMGEMHRELNA  | 21778 | O15540 | DVAVVRHYEKA  | 21745 | O14521 | ICKAVAMWLKL  | 21717 |
| P48546 | NEASRELESYC  | 21778 | Q12809 | PLHRHGSDPGS  | 21745 | O95833 | LAAYRPAVHPR  | 21716 |
| O60779 | DPQSSSQVTT   | 21778 | Q13563 | AGGNGSSNVHV  | 21745 | P49247 | GSVNMRKPFPC  | 21716 |
| P52565 | WNLTIKKDWKD  | 21777 | P12318 | LPPNDHVNNSN  | 21744 | P11474 | LFLEMLEAMMD  | 21715 |
| P55316 | NQSSSNPLIH   | 21776 | P48146 | FRKNFRSILRC  | 21744 | Q13526 | DSGIHILRTE   | 21715 |
| P01106 | HKLEQLRNSCA  | 21776 | Q15648 | DDLMDVALIGN  | 21744 | O08765 | VAYSGENTFGF  | 21714 |
| O76083 | RDVKNSEGDCA  | 21775 | P41226 | DTAFPLHYEL   | 21744 | P42858 | CLRNVHKVTTT  | 21714 |
| P45954 | NTIAKHIDAEY  | 21774 | P25067 | SSFSGLLCPT   | 21743 | Q02223 | ATEIEKSISAR  | 21713 |
| P09467 | FLKVYEHKSAQ  | 21774 | P30281 | STPTDVTAIHL  | 21743 | P51677 | STAEPELSIVF  | 21713 |
| Q92186 | KLTVGQCQDGT  | 21773 | O96017 | TKRPAVCAAVL  | 21743 | Q9Y5V3 | NFGAIGFFWVE  | 21713 |
| O15212 | QAAKAGAPGKA  | 21773 | P01778 | SDVWQGQTLVS  | 21743 | P11476 | TPVKQSGGGCC  | 21713 |
| P53814 | RHELASRGKNV  | 21773 | Q15102 | GQGAPLLEPAP  | 21743 | Q14999 | CTATQSFSTFR  | 21713 |
| Q15057 | LNRFFQDQSQF  | 21773 | P18206 | LRWVRKTPWYQ  | 21743 | P02810 | PQGGPPQCGSPQ | 21712 |
| Q92968 | SIGKDGEKQDL  | 21772 | Q00796 | MLKCDPSDQNP  | 21742 | O95807 | FKFGRTEDLWQ  | 21711 |
| P04628 | CTHTRVLHECL  | 21771 | P19429 | GMEGRKKKFFES | 21742 | P23197 | SEDDDKKDDKN  | 21710 |
| P35813 | DTDSTSTDDMW  | 21770 | P04818 | PHPTIKMEMAV  | 21742 | Q9NY72 | NKENSAPVVEE  | 21709 |
| P53350 | SRSASNRLKAS  | 21770 | Q16740 | APAAEPVPAST  | 21741 | Q03014 | IEGDKSYFNAG  | 21709 |
| P07108 | KVEELKKKYGI  | 21769 | P57058 | FDMAAGVKTQC  | 21741 | P50402 | HFMQAEEGNPF  | 21707 |
| P02771 | LISKTRAAALG  | 21769 | P13797 | ACLMGRGMKRV  | 21741 | P21217 | QTVRSIAAWFT  | 21707 |
| P31689 | HPRGGVQCQTS  | 21769 | Q9Y6A2 | GWQPAPPPPPC  | 21740 | P51808 | IVNVFAIAIVL  | 21707 |
| Q13241 | KNRYIKQQCLI  | 21768 | P01781 | WGQGLTVTVST  | 21740 | P50395 | KRKKNDIYGED  | 21706 |
| P10124 | GQHGLEDDEFML | 21768 | P35408 | SETLNLSEKCI  | 21740 | Q99678 | LTQALANGPEA  | 21706 |
| O75843 | EVNNLPVESWQ  | 21767 | P30086 | VPKLYEQLSGK  | 21740 | Q00973 | FKHRLQCMTSQ  | 21705 |
| O00141 | FSYAPPTDSFL  | 21767 | P53609 | KQCSNVHIST   | 21740 | P53675 | APLVDFDFDGE  | 21705 |
| P30273 | YETLKHKKPPQ  | 21766 | P39877 | QYQYFNPILCS  | 21739 | P05413 | AVCTRTYEKEA  | 21705 |
| Q9Y512 | GVQFGAGHRFL  | 21765 | P57086 | IRRTDVRITG   | 21739 | O95257 | NDWVPSITLPE  | 21705 |
| Q9Y261 | GVYSRPMNNS   | 21765 | Q04941 | AAPTDPAADGPV | 21738 | Q02643 | RSAAKVLTSMC  | 21705 |
| Q07869 | PLLQEYRDMY   | 21765 | P19237 | MFDAAKSPTSQ  | 21738 | Q92959 | EYNVQKAAGLI  | 21705 |
| Q14738 | EEFLTASQEAL  | 21764 | Q99798 | SALNRMKELQQ  | 21737 | P56706 | QYTKVWQCNCCK | 21705 |
| P05089 | HKPIDYLNPPK  | 21764 | P34947 | NHVSSNSTGSS  | 21737 | P09496 | LISLQAPLVH   | 21703 |
| O60840 | LGDMEACVHAL  | 21764 | P01253 | LTQEQKQAGES  | 21737 | P49366 | MDAFMHEKNED  | 21703 |
| P24462 | AESRDETIVSGA | 21764 | P11245 | VPKPGDGSLLTI | 21736 | Q9Y5M6 | LSWYSFILLVL  | 21703 |
| P15172 | GANPNPIYQVL  | 21764 | Q14201 | HWINPHMLAPH  | 21736 | P49761 | RSFHTSRNPSPR | 21702 |
| P36873 | PRGMITKQAQAK | 21764 | O00230 | NFFWKTFFSSCK | 21736 | P00390 | PTSSEELVTLR  | 21702 |
| P28289 | GPIPKCRSGV   | 21764 | P31941 | RLRAILQNQGN  | 21736 | Q05901 | PALKMWLHSHY  | 21701 |
| P02647 | LEEYTKKLNTQ  | 21763 | P22061 | TDKEKQWSRWK  | 21736 | P14635 | VQDLAKAVAKV  | 21701 |
| P12272 | TTSLELDSRRH  | 21763 | P32322 | LPRSLAPAGKD  | 21736 | Q14534 | LIYSEMKYVMVH | 21701 |
| P25774 | GIASFPSYPEI  | 21762 | P06744 | FIKQGREARVQ  | 21735 | P01009 | FMGKVVNPQTQK | 21700 |
| P12104 | GVEAKRIFKKD  | 21762 | P02585 | DEFLKMMMEGVQ | 21733 | P49450 | RRIRGLEEGLG  | 21700 |
| P39030 | RRNTLQLHRYR  | 21762 | P51911 | NHHAHNYNSA   | 21732 | P48507 | GYLQAKRRGS   | 21700 |
| O43295 | PNSSADKSGTM  | 21762 | Q12933 | FIKAIVDLTGL  | 21732 | P21128 | YIATAYIVSST  | 21700 |
| P28676 | YDDFLQGTMAI  | 21761 | O14530 | GKKYDSDSDDD  | 21731 | Q9UMN6 | CGAKRCRRFLN  | 21700 |
| P55884 | TEEIPLGNQE   | 21761 | Q06210 | PRNLAKSVTVE  | 21731 | Q93050 | FEHIREGKFEE  | 21700 |
| Q99956 | TSDGAFELAPT  | 21760 | P15170 | GKVLKLVPEKD  | 21731 | O15247 | KEIENTYANVA  | 21699 |
| Q14139 | AERKQVQKQLE  | 21759 | P01775 | FAHWGQGTLLT  | 21731 | Q08493 | PGDLPLDNQRT  | 21699 |
| P16452 | SVTVVAPELSA  | 21758 | P20742 | PCSTDTEHGNV  | 21731 | P04469 | EYDSLYPEDDL  | 21699 |
| P14550 | GHPLYPPNDPY  | 21758 | P55017 | NQENVLTFYQC  | 21731 | P02708 | AGRLIELNQGG  | 21698 |
| O15528 | ERSINLQFLDR  | 21758 | P31607 | SKNYNMMTVSG  | 21730 | P32238 | YSHMSASVPPQ  | 21698 |
| P19419 | PVVLSPGPQPK  | 21758 | P20815 | VDSRDGTLSE   | 21730 | P24468 | SSFNWPYMAIQ  | 21698 |
| P08238 | DEDAASRMEEVD | 21758 | O15371 | EEEEEEEEET   | 21730 | P20071 | LVFDVELLKE   | 21698 |
| P22459 | CSNAKAVETDV  | 21757 | P54922 | LGSKEDTVISL  | 21729 | Q93009 | TYLEKAIKIH   | 21698 |
| P02671 | VRMKIRPLVTQ  | 21757 | P45880 | FPPPEDDQNK   | 21729 | O43931 | LARKLAVLTPG  | 21697 |
| O95749 | HLSKMFKEENE  | 21757 | Q99439 | YPPYYQEEAGY  | 21728 | P15516 | RGYRSNYLYDN  | 21697 |
| Q15506 | SLQNEKEENEK  | 21757 | P01833 | AAEAQDGPQEA  | 21728 | Q9Y2J8 | PFTFKWVWHMVP | 21697 |
| P01210 | MEKRYGGFMRF  | 21756 | Q92839 | RRRTGGYRVQV  | 21727 | P21817 | CFRKQYEDQLS  | 21697 |
| P51787 | TVPRRGPDDEGS | 21755 | P50336 | AVSVLGTPEPNS | 21727 | P22105 | PRNFRSPAGGG  | 21697 |
| Q15393 | KLEDIRTRYAF  | 21755 | P07714 | CLYSRLTICEF  | 21727 | Q12766 | GEEEEEVAABAE | 21697 |
| Q15847 | SGIGKVKFGLLK | 21754 | Q05940 | PIGEDEESES   | 21726 | P20036 | SGHDPRAGQGT  | 21696 |
| P08572 | ISRCQVCMKNL  | 21754 | P15882 | ELLIKNEDILF  | 21725 | P01776 | FDVFGQGTLLT  | 21696 |
| Q9Y375 | NSPELNPRLFK  | 21754 | Q01362 | DPGEMSPPIDL  | 21725 | Q99697 | SACQYAVDRPV  | 21696 |
| P32019 | EFIHQFLCNPL  | 21754 | P98161 | RAKNKVHPSST  | 21725 | Q9UQ74 | VTGHFTFTLYR  | 21696 |
| Q9ULW8 | PFSFKWNNMVP  | 21754 | Q16513 | FRDFDIADWC   | 21725 | P98177 | EGLDFNFEPDP  | 21695 |
| P49356 | KDETSAPATD   | 21754 | P30566 | SVMKVKAELCL  | 21725 | O76074 | INGESGQAKRN  | 21695 |
| P52757 | QILIENEDVLF  | 21753 | Q14156 | YEMKFPDLCVY  | 21725 | P18505 | FNVVYWLYYVH  | 21695 |
| P53804 | QNLQELPSCSSR | 21753 | O43325 | PVYLRSHDEVS  | 21725 | P10263 | RKEILRHGNSQ  | 21695 |
| P29372 | VDRVAEQDTQA  | 21752 | P23760 | GQYQSKPWTF   | 21724 | P50135 | NNTLSFIVIEA  | 21695 |
| Q13740 | KLEENNHKTEA  | 21752 | Q9UJU3 | NLHRNEDSVLF  | 21724 | P27708 | MALLATVLRGRF | 21695 |
| Q9UGM5 | AQNASPLVLP   | 21752 | Q16181 | LEKNKKKGKIF  | 21723 | Q07011 | FPPEEEGGCEL  | 21694 |
| P40967 | ENSPLLSGQV   | 21752 | O14627 | PIEQGTIVVSE  | 21723 | O15217 | YVRTVYNIFRP  | 21694 |
| P17676 | PEPLASSGHC   | 21751 | P32455 | KMRRRKACTIS  | 21723 | O95139 | PPMKEFPDQHH  | 21694 |
| P20694 | LARECTIATA   | 21751 | O75388 | SSCPRGNAPRE  | 21723 | O14625 | LIKKVERKN    | 21694 |
| P11511 | TPRNSDRCLEH  | 21751 | Q15116 | RPEDGHCSWPL  | 21723 | P30260 | TQLHAAESDEF  | 21693 |
| O60575 | QDIQIMKDGKC  | 21751 | Q07326 | WNRKQLTYKNN  | 21723 | P01568 | KIFQERLRRKE  | 21693 |
| P07585 | VRSAIQLGNYK  | 21751 | O15428 | HPEDQGRREGL  | 21723 | P28715 | LRARGRKRKKT  | 21693 |
| O75506 | SENKIPATQKS  | 21750 | Q92733 | SRRTQAKAYGF  | 21723 | Q9NYP9 | ESKLSFATCKS  | 21692 |
| P05546 | FMGRVATPSRS  | 21750 | P30041 | GKKYLYRTPQP  | 21722 | P31150 | KQNDVFGAEAQ  | 21692 |
| Q16537 | RGLRRDGIPT   | 21749 | O95817 | MTDTPGNPAAP  | 21722 | P24606 | IVITKGHFAMV  | 21692 |
| O60548 | SKVAGLSGCHF  | 21749 | P43234 | GIADSVSIFV   | 21722 | Q06546 | ATASLQTEKDN  | 21691 |
| O14810 | LPGPLQDMLKK  | 21748 | P23945 | ILVPLSHLAQN  | 21721 | O60240 | RTHYSQLRKKS  | 21691 |

ID: ID from Uniprot Database (<http://www.uniprot.org/>) Sequence: Listed sequences match the Uniprot ID, but for the array experiments and for the computational predictions, the cysteines were changed to serine. NA: not available. BLU: biochemical light unit.

Table S1: Binding data from CAL peptide array.

| ID     | Sequence     | BLU   | ID     | Sequence    | BLU   | ID     | Sequence     | BLU   |
|--------|--------------|-------|--------|-------------|-------|--------|--------------|-------|
| Q9Y5W5 | RRDPPESNYIW  | 21691 | P57738 | AANEPLKTHRE | 21666 | P07477 | KWIKNTIAANS  | 21642 |
| O75131 | PKNPATKQKQK  | 21690 | O75631 | RAEVYSSKLQD | 21666 | P29597 | QGQAPSVFSVC  | 21642 |
| P24855 | SDHYPEVVMK   | 21690 | O43903 | SASYKAKKEIK | 21665 | Q9Y3D9 | EVVTFPGNPNT  | 21641 |
| Q92806 | CLPPPESESKV  | 21690 | P32004 | TSPINPAVALE | 21664 | O95340 | LTDYYSLEKN   | 21641 |
| Q15628 | LGLTDPNGGLA  | 21690 | Q13946 | SQLLPQENRSL | 21664 | P53025 | KSTMKGPKRQLY | 21641 |
| Q13061 | ANSPGQKQGGQ  | 21690 | Q14469 | TADSMWRPWPN | 21664 | P04895 | QRMHLRQYELL  | 21640 |
| P27469 | GRALSNRQHAS  | 21689 | O15072 | RRPTRSSTLER | 21663 | Q06323 | KPRGETKGMIV  | 21640 |
| Q15643 | GLGPGGGPIFF  | 21689 | Q02742 | LRHKALETCLK | 21663 | P08919 | ELYLQSLTAEH  | 21640 |
| P55145 | APKAASAPTDL  | 21688 | P28827 | YEVALEYLNSG | 21663 | O75348 | PEIHENYRING  | 21640 |
| P19526 | DLSPWLTLAKP  | 21688 | P20333 | LGVDPAGMKPS | 21663 | P04438 | WGQGTWSPSLQ  | 21639 |
| Q02325 | IRMRDAVLFEK  | 21688 | P15374 | LRFNAIALSAA | 21663 | P31268 | DDDEEEDEEEE  | 21639 |
| P08134 | KNKRRRGCPIL  | 21688 | Q9UHT9 | AIRTGAAIFTQ | 21662 | O14746 | ALPSDFKTILD  | 21639 |
| O14604 | TIEQERQAGES  | 21688 | Q14161 | MQKKLLGKDAN | 21662 | P20851 | LKKAELKAKLL  | 21638 |
| O14757 | VSSQKVWLPAT  | 21686 | Q9Y5M8 | EVSPHVKTGTK | 21661 | Q99447 | AQPLGERDGDG  | 21638 |
| O43826 | TKMGRVSKKAE  | 21686 | Q14289 | VLANLAHPPE  | 21661 | O75962 | NFLQSRLLPRV  | 21638 |
| P17152 | CVKKIYELAY   | 21686 | P22083 | SIRNLASWFER | 21661 | P21281 | SEFYPRDSAKH  | 21638 |
| P42323 | IVLLQLCDIQK  | 21686 | P51570 | QAADGAKVCL  | 21661 | P38398 | YLIPQIPHSHY  | 21637 |
| P51811 | QFLNAEDLCSA  | 21686 | P49915 | TSKPPGTTEWE | 21661 | O00762 | TSYKQVTSQEP  | 21637 |
| Q15011 | LLPEGPPAIAN  | 21685 | O75031 | LEDLRTLHNHV | 21661 | Q14011 | DSYDSYATHNE  | 21636 |
| Q9UKR8 | YVAQAGLELLA  | 21685 | P04792 | AQLGGRSCKIR | 21661 | O00295 | QAFSICLSSFN  | 21636 |
| P37231 | PLLQEIYKDY   | 21684 | O43252 | LTEYYKSLEKA | 21661 | O00526 | FIALALGRSK   | 21636 |
| P01225 | PSYCSFGEMKE  | 21683 | Q9Y3C0 | ESSDSESSFS  | 21660 | P05067 | PTYKFFEQMQN  | 21635 |
| Q14106 | SQQFQPVVLAN  | 21683 | O00116 | PNNIFGNRNLL | 21660 | P13671 | MEILHPGKCLA  | 21635 |
| Q13510 | LRDCPDPCIGW  | 21682 | O60383 | EDMIATKCTCR | 21660 | Q11130 | VYEDLEGWFQA  | 21635 |
| P46093 | QVQLKMLPPAQ  | 21682 | P02304 | RQGRTLYGFGG | 21660 | P21796 | HKLGLGLEFQA  | 21635 |
| O75791 | FPANYVAPMTR  | 21682 | P11086 | VFFAWAQKVGL | 21660 | P11387 | AIDMADEDYEF  | 21635 |
| P35568 | ISFQKQPEDRK  | 21682 | P38435 | ESNPDPVHSEF | 21660 | P30039 | PIFIADAFNVR  | 21635 |
| O94903 | VKAPLEVAQEH  | 21682 | Q92974 | RSSPQAMPCT  | 21659 | O00755 | CSESTEMYTCK  | 21635 |
| P24410 | NKPKVQCCQNI  | 21682 | Q13522 | PPLDSKGANSV | 21659 | P18507 | NLYVWVSYLEL  | 21634 |
| P53365 | GAEKPSWLEEQ  | 21681 | Q99814 | GDLRLALDQAT | 21659 | O14843 | GTGGQVACAES  | 21634 |
| P15121 | SHKDYPPHEEF  | 21680 | P06737 | LSNESNKVNGN | 21659 | P22064 | ALNLEKDSLE   | 21634 |
| Q92935 | QRKKYRSLEKP  | 21680 | Q10469 | HELCKSYRRLQ | 21658 | O94759 | QKAAAEFGAHY  | 21634 |
| Q99928 | NLVYWVGYYLY  | 21680 | P13224 | LVAERAGTDES | 21658 | P49754 | GPASAILEMCK  | 21634 |
| P07902 | GQKDRRETATIA | 21680 | Q9UBM1 | RQKASGSHKRS | 21658 | P29354 | RNYVTPVNRNV  | 21633 |
| P29034 | NDFQGCPCDRP  | 21680 | P16070 | NLQNVDMKIGV | 21657 | Q13867 | PAWDPMGALAE  | 21632 |
| Q04724 | DKKATVYEVII  | 21680 | P16383 | LDHLKSLIKED | 21657 | P31644 | EPVIGKAASPK  | 21632 |
| P00750 | YLDWIRDMNRP  | 21680 | P26678 | LLIICHIVMLL | 21657 | P04898 | IKNNLKDCGLF  | 21632 |
| O75648 | PEDGPGLSPLL  | 21680 | P08918 | ELYLQHLTALH | 21657 | P13051 | SGKKPIDWKEL  | 21632 |
| P20827 | LLPLLLLTPT   | 21679 | P34932 | SDKKLPEMDID | 21656 | Q15050 | GGQRPGGKRRK  | 21632 |
| P25686 | DSLWEERKGV   | 21679 | P48739 | GSVRGTSAADV | 21656 | P02751 | DVQADREDSRE  | 21631 |
| P07226 | LDQTLNELNCI  | 21679 | Q9Y458 | FAKGFRDTGRN | 21656 | P78367 | LSTCAAAAGTQ  | 21631 |
| P08670 | NETSQHHDDLE  | 21679 | Q14657 | EWQDPGRPLES | 21655 | Q9UHV9 | AKASSAGVLVS  | 21630 |
| P04217 | SDPVELLVAES  | 21678 | P42765 | QGIAVIQSTA  | 21655 | Q15036 | FAFEGIGDEDL  | 21630 |
| P18846 | TLKDLYSNKS   | 21678 | O43570 | PATKMETEAHA | 21654 | O00257 | LTVTFFKEYVT  | 21630 |
| Q12934 | SDKKKSGEKSS  | 21678 | P35575 | QVLGQPHKKSL | 21654 | O43316 | KATPTHFSSHWP | 21629 |
| P52789 | VACRIREAGQR  | 21678 | P28069 | FSISKEHLECR | 21654 | Q14694 | YLLYYRRVDLL  | 21629 |
| P13645 | VGESSSKGPRY  | 21678 | P25940 | EGEGGAGGEPG | 21653 | Q9UPY5 | ILEVVPEDDKL  | 21629 |
| P36941 | RGRPNQFTHID  | 21678 | O60658 | MKLRLNLRPPE | 21653 | O95479 | VWYMDYDAFLG  | 21628 |
| Q13595 | RSRSYSPPRY   | 21678 | Q10981 | IAADLSPLLK  | 21653 | P48061 | LEKALNKRFKM  | 21628 |
| P31944 | QSTLRKRLYLQ  | 21677 | P28072 | PKFAVATLPPA | 21653 | P23771 | HHPSMVTAMG   | 21627 |
| P15863 | LHGLPIPASTS  | 21677 | Q07157 | ANCVSVLIDHF | 21652 | P17275 | QLLLGVKGHAF  | 21627 |
| Q16647 | HDVPPVYRIRP  | 21677 | P35637 | EHRQDRRERPY | 21651 | Q9UBV4 | CESMTDVHTCK  | 21627 |
| P17900 | CIKIAASLKGI  | 21677 | Q01415 | PGGGALVLEA  | 21651 | P49638 | DYLSSESIESQ  | 21625 |
| P11230 | TYHLPPDPFPF  | 21676 | O94782 | TPYLLLFYKKL | 21651 | Q9UL15 | YLDLKSDEWEY  | 21624 |
| P53367 | GVDAPSWLEEQ  | 21676 | P23582 | DRIGSMGLGCG | 21650 | P01861 | TQKSLSLSLGK  | 21624 |
| P25685 | SRTVLEQVLP   | 21676 | Q9Y217 | PDHWTGLGLNC | 21650 | P14136 | KESKQEHKDV   | 21624 |
| O60493 | KSYTPSKIRHA  | 21676 | P48145 | LRQLITCRAAA | 21650 | P09210 | SLEESRKIFRF  | 21624 |
| P41439 | AGAPSRGIDS   | 21675 | P52945 | SVAPRRPQEP  | 21650 | P10163 | PRPAQGGQPPQ  | 21624 |
| P08151 | PGETEFLNSSA  | 21674 | Q00978 | PEQQAAILSLV | 21650 | P01585 | TFCQSIISTLT  | 21623 |
| P12079 | ILGYTRRATSR  | 21674 | P50607 | LSSFDSKLACE | 21650 | Q9Y5X3 | LQSCIDLFKNN  | 21623 |
| P26367 | PDMSQYWPRLQ  | 21674 | P41002 | EEDMNLGLVRL | 21649 | Q04323 | AVLIVAKKCP   | 21623 |
| P42694 | SGSNFGYSYFK  | 21674 | O14626 | QKEKLRCENNA | 21649 | Q12948 | SGAFVYDCSKF  | 21622 |
| P49902 | DDDEEEDEEEE  | 21673 | O95985 | DKMSALAAFYV | 21649 | O95390 | PGMVVDRCGCS  | 21622 |
| P09758 | ELGELRKEPSL  | 21673 | P31940 | PTEVQEPIITA | 21649 | P05014 | TNLQKRLRRKD  | 21622 |
| P52952 | GVSTLHGIRAW  | 21673 | Q9Y696 | AYSDVAKRLTK | 21648 | P98077 | HLLLVDPGEV   | 21622 |
| Q99614 | INFVQNPNNNR  | 21673 | P49289 | TAGAIMETNLK | 21648 | P51854 | HVAVKCMMLN   | 21622 |
| P41597 | PEASLQDKEGA  | 21672 | O95816 | TLQQNAESRFN | 21647 | O60232 | EALRSLQLQLH  | 21621 |
| P50238 | GRGGAESHTEK  | 21672 | P20718 | LPWIKRTMKRL | 21647 | P52566 | WNLSIKKEWTE  | 21621 |
| Q99819 | WGLCICQDWKD  | 21671 | P41221 | CTEIVDQFVCK | 21647 | P13472 | TIEQEKREIS   | 21621 |
| P06730 | SGSTTKNRFV   | 21671 | Q92947 | ITGIQAFSTAK | 21646 | O14813 | KPGPALKTNLF  | 21620 |
| O60637 | YELLITGGTYA  | 21671 | Q14410 | LIGARYISGVP | 21646 | P07996 | FSDLKYECRDP  | 21620 |
| P43235 | GIANLASFPKM  | 21670 | Q15127 | GALHVYSFGSD | 21646 | O14514 | GQDIIDLQTEV  | 21619 |
| P98174 | PPESPQTRDKT  | 21670 | P48059 | YEISIGAEKKT | 21646 | Q16589 | FKVAQTLCFPS  | 21619 |
| P22301 | IEAYMTMKIRN  | 21670 | Q99705 | ADEERTESKGT | 21645 | O15315 | EGLVLQAYGNS  | 21619 |
| Q9Y2G7 | LTYHGRHNV    | 21670 | P14616 | DCSPQNGGPGH | 21645 | Q9Y5P3 | KQRLATFFPRK  | 21619 |
| P33897 | QGPGLQGAST   | 21669 | Q15765 | RNKDDSTKNKA | 21645 | P49792 | RRITITECGQI  | 21619 |
| P47902 | SPMPVKEEFLP  | 21669 | O14681 | SPAKLKATAGH | 21645 | P00734 | WIQKVIDQFGE  | 21619 |
| O43189 | YLVWGGGGIF   | 21669 | P15154 | VKKRKRKCLLL | 21645 | Q9Y614 | EHQAKAGSDKL  | 21619 |
| Q9Y6C5 | LSSRGPGPATG  | 21669 | Q92737 | GALHPARCSLM | 21645 | P31933 | GGQGEALLNTT  | 21619 |
| Q06418 | LQQGLLPHSSC  | 21669 | P13521 | EHIAKRAMENM | 21645 | P41238 | TGLIHPSVAWR  | 21618 |
| O60830 | APGYPSYQYH   | 21668 | O95411 | HKLNLRGKAWG | 21645 | P09972 | AQSLYIANHAY  | 21618 |
| P81277 | LEGGAMSSQDG  | 21668 | Q9Y5B6 | IWTDRPCVVFS | 21644 | P09497 | LMSLKQTPLSR  | 21618 |
| Q92609 | SGFTIVSLDI   | 21668 | P17535 | QLLPQHQPAY  | 21644 | Q07343 | IATEDKSPVD   | 21618 |
| P51636 | FSSVSLQLSQD  | 21667 | P31639 | AVAEFLWGFYA | 21644 | Q08499 | ACVIDDRSPDT  | 21618 |
| P01024 | TESMVFVGCPCN | 21666 | Q93068 | YQEQTGGHSTV | 21644 | P32298 | PSEKEVEPKQC  | 21618 |
| P52849 | LRLEELQHSSLG | 21666 | P23025 | MCGHELTYEKM | 21643 | P14210 | KILTLYKVPQS  | 21618 |
| O00233 | LLGCNIPLQR   | 21666 | P19447 | HVHPLFKRFRK | 21643 | Q15907 | KPNKLQCCQNL  | 21618 |
| Q9UQ72 | GVTGYFTFTLY  | 21666 | P35453 | KIVSKLKDTVS | 21642 | P23497 | PPSTRKKVTIK  | 21618 |

ID: ID from Uniprot Database (<http://www.uniprot.org/>) Sequence: Listed sequences match the Uniprot ID, but for the array experiments and for the computational predictions, the cysteines were changed to serine. NA: not available. BLU: biochemical light unit.

Table S1: Binding data from CAL peptide array.

| ID     | Sequence     | BLU   | ID     | Sequence     | BLU   | ID     | Sequence     | BLU   |
|--------|--------------|-------|--------|--------------|-------|--------|--------------|-------|
| P18847 | IQKKEGTLQS   | 21617 | P27924 | VETATELLLSN  | 21597 | P43487 | EETKEDAEKQ   | 21575 |
| P49759 | HPFFDLLKSI   | 21617 | O95972 | EGMIAESCTCR  | 21596 | O60704 | QNSTSSHLGSS  | 21575 |
| O14793 | PAMVVDRCGCS  | 21617 | Q99853 | PASALHSVAVH  | 21596 | O76071 | AFWKYQRPEGL  | 21574 |
| O00270 | PPDFNPRDSYS  | 21617 | O60628 | VSDIEAVRASW  | 21596 | P50213 | EEICRRVKDLD  | 21574 |
| Q9Y277 | HKVGLGFLEEA  | 21617 | P12544 | NWIMTIKGA    | 21595 | P08476 | QNMIVEECGCS  | 21574 |
| P30047 | GQTLVWCLHKE  | 21616 | P18084 | KFNKSYNGTVD  | 21595 | P53041 | YANTLLQLGMM  | 21574 |
| Q02083 | QANLSLEALFQ  | 21616 | Q9Y487 | SSKFNNDSDVA  | 21595 | P20472 | VDEFSTLVAES  | 21574 |
| Q09470 | CVNKSLLTDFV  | 21615 | P10070 | AESKFLNMMT   | 21594 | P01100 | DSLSSPTLLAL  | 21573 |
| Q00169 | KDPVKGMTADD  | 21615 | O75364 | SPCQYAVERP   | 21594 | P16402 | TKAKKAAPKKK  | 21573 |
| P49760 | KLWDSSRDISR  | 21614 | Q13103 | RHRARINTDFE  | 21593 | P28062 | DLLHQYREANQ  | 21573 |
| O14610 | PFKEKGGCLIS  | 21614 | Q12774 | TAKLQVEQQA   | 21593 | P17787 | LHSDHSAPSSK  | 21572 |
| P50148 | LQLNLKEYNAV  | 21614 | P05108 | FWPFNQEAQQ   | 21592 | P01574 | FINRLTGYLRN  | 21572 |
| P39905 | RKHSACRCGCI  | 21614 | P40818 | SLGPRVTDVAT  | 21592 | P00790 | ANNQVGLAPVA  | 21572 |
| P09681 | DQTNLCRLRSR  | 21614 | P14314 | EAPTEDDHDEL  | 21591 | Q9Y5K1 | LPNKLKFGGWI  | 21572 |
| P50552 | FVQELRRKRGSP | 21614 | Q99680 | EKRLVQVQVTD  | 21591 | P56554 | AKQIVQKSLGL  | 21572 |
| P30556 | TKKPAPCFEVE  | 21613 | P50452 | CILFCGRFSSP  | 21591 | Q93034 | ESDINTFIYMA  | 21572 |
| O95832 | KPAKSSGKDYV  | 21613 | P13805 | ACKGRVGGRWK  | 21591 | Q93098 | GGAHKKPGRKP  | 21572 |
| Q15155 | RQAKKQKTRRT  | 21613 | Q16082 | EEEEAAIVEP   | 21590 | P36888 | LLSPQAQVEDS  | 21571 |
| P18124 | DQINRLIRRMN  | 21613 | P01742 | EYNGGLVTSS   | 21590 | P56159 | LSTLLSLTETS  | 21571 |
| Q13829 | RQLGHQESTHRD | 21613 | O95825 | NQGRKKQVVQF  | 21590 | P40197 | FRKLIRERALG  | 21571 |
| Q9UK80 | YQLMQEPPRCL  | 21613 | P29401 | AQAVRGLITKA  | 21590 | Q03013 | LYTRVAVWGNK  | 21571 |
| P41223 | CTHCGCRGCSG  | 21612 | O95858 | AGTGCCLCYPN  | 21590 | P29043 | RLKGDMMRDEL  | 21571 |
| P09630 | REETEKEKQKE  | 21612 | P49459 | SAIVEQSWRDC  | 21590 | O43416 | FLKQESFPTSE  | 21571 |
| P51149 | RAKASAESCSC  | 21612 | P09544 | APKNADWTTAT  | 21590 | P01744 | WGQGTTVTVSS  | 21571 |
| P12319 | NPHKPNPKNN   | 21611 | O60269 | SCCGCSGAPE   | 21590 | O43511 | VQDEAMRTLAS  | 21571 |
| Q9UBS5 | CDGSRVHLLYQ  | 21611 | Q03113 | LQENLKDIMLQ  | 21589 | O60861 | TGNIRPVDMEI  | 21570 |
| P16871 | YVTMSSFYQNK  | 21611 | P02538 | TSSSSRSKYKH  | 21589 | O75459 | TPEEDEGQSQP  | 21570 |
| P13232 | WNKILMGTEKH  | 21611 | P28070 | WDIAHMISGFE  | 21589 | P30550 | INGNICHERYV  | 21570 |
| Q9Y2B9 | QPQSSDGTSS   | 21611 | P50914 | APAPKASGKKA  | 21589 | P33551 | FRRLPKKPKK   | 21569 |
| P81489 | PQEGNKRSGAR  | 21611 | P09494 | LDQTLLELNNM  | 21589 | P13639 | IPALDNFLDKL  | 21569 |
| Q02040 | SPSRHRSTWNR  | 21611 | O00418 | KAEAEAWAMEE  | 21588 | P29777 | IAKNLRGCGLY  | 21569 |
| P49190 | EGCGGETEDVL  | 21610 | P49795 | LQGPSQSSEA   | 21588 | P48637 | GVAVDNPPYPV  | 21569 |
| P15336 | APSSSQSPSGS  | 21609 | P30968 | FDPLIYGYSFL  | 21588 | Q15390 | MKALIENVSDS  | 21569 |
| P51681 | STGEQEISVGL  | 21609 | Q14240 | EEMPMMNVADLI | 21588 | O96001 | DDEKDGDKIAI  | 21568 |
| Q07352 | PIFSRLSISDD  | 21609 | Q03527 | KQEGTPEGLYL  | 21588 | P49773 | LGGRQMHVWPPG | 21568 |
| P48995 | TSKYAMFYPRN  | 21609 | Q16881 | RS GASILQAGC | 21588 | P30536 | HGWHGRRRLPE  | 21568 |
| P10746 | IRKALQPHGCC  | 21607 | Q16831 | SYFIKKKLSKA  | 21588 | Q13200 | VILRKNPNYDL  | 21568 |
| P25092 | LNTTDKESTYF  | 21607 | Q12765 | DCVDTEIKFFK  | 21588 | Q9UHP3 | LSLSRTPADGR  | 21568 |
| P80108 | GALHVVLSGSD  | 21607 | Q13286 | LPLHDFLCQLS  | 21587 | Q14576 | VSFKTSKQHKA  | 21567 |
| P05187 | TLLLETATAP   | 21607 | O60636 | CCAIRNSRDVI  | 21587 | O15063 | GERRPAYLPQY  | 21567 |
| P53794 | LGIFMFVYFSL  | 21607 | P08754 | IKNNLKECGLY  | 21586 | P01743 | SEDATVYYCAR  | 21566 |
| P56847 | PGLCQHKVVGAR | 21607 | O00178 | QGACVTPASGC  | 21586 | Q14669 | AREGQSFHLS   | 21566 |
| Q9UGP9 | DKTIKLWMSDC  | 21607 | P24386 | TNLGNLEESSE  | 21586 | P03973 | CGKSCVSPVKA  | 21565 |
| Q9UMQ6 | LEQWLQMTMWG  | 21606 | P30542 | DEDLPEERPDD  | 21585 | P49715 | SSLVKAMGNCA  | 21565 |
| Q13439 | LMFTSPRSRGIF | 21606 | P01903 | KSNAAERRGPL  | 21585 | P06276 | YTSKKESCUGL  | 21565 |
| P01906 | SVGASRHQGLL  | 21606 | P37140 | PPRTANPPKKR  | 21585 | Q64252 | PNWATQDSGFY  | 21565 |
| Q13087 | ANSTMGSKKEEL | 21606 | P35237 | GILFCGRFSSP  | 21585 | O75293 | QWVPYISLQER  | 21564 |
| Q99453 | AKAALVKSSMF  | 21606 | Q02543 | RFTTKRPNFTF  | 21585 | O14893 | FDQRDLADEPS  | 21564 |
| P22891 | RYSLWFKQIMN  | 21606 | P07478 | DWIKDTIAANS  | 21585 | P48544 | LGSREARGSV   | 21563 |
| Q92995 | GYMYFYRRIPS  | 21606 | Q01167 | PAAVREKGVQN  | 21584 | Q13882 | LSSFTSYENPT  | 21563 |
| O95847 | KIREMSCVSPF  | 21606 | Q04671 | LLVAHVVGWVN  | 21584 | P31431 | YKKAPTNEFYA  | 21563 |
| Q93073 | HSDSNYTTQTT  | 21606 | Q04844 | PDLPYAPCIQP  | 21583 | P36897 | SQLSQEGEIKM  | 21563 |
| Q9Y2Z2 | CDADRLQEREL  | 21606 | P78537 | VYKGQLQSAPS  | 21583 | P51669 | IAREWTKQYAM  | 21563 |
| O60609 | TLPLLLLSLW   | 21605 | P57678 | RQTLQKMSF    | 21583 | Q92546 | APGPSTTITI   | 21563 |
| P22732 | LKELPVPVTEH  | 21605 | P50897 | WFYAHIPFLG   | 21583 | O75487 | ILFLVMQREWR  | 21562 |
| Q9UKU6 | LFQWLQKALRQ  | 21605 | P22674 | LVPGPAAGPLP  | 21583 | P51587 | KQDTITTKKYI  | 21561 |
| P02023 | GVANALAHKYH  | 21604 | P20160 | GVLNNPGPGPA  | 21582 | P54652 | ASGGPTIEVD   | 21561 |
| P12324 | LDQTLTDLNEM  | 21604 | P31274 | MKKMNKEKTDK  | 21582 | O14829 | DLMKPDVTNLG  | 21561 |
| O14764 | VNVVYAAAYAM  | 21603 | Q16342 | FVWKQDVTDT   | 21582 | Q05932 | VLKLEPALSP   | 21560 |
| P41247 | VKFLLENWFE   | 21603 | P04085 | KKRKRRLKPT   | 21582 | P53539 | DPLNSPSSLAL  | 21560 |
| P15515 | G DYSGNYLDN  | 21603 | P51800 | ISNLNPPAPK   | 21581 | P26572 | PTWEGYDPSWN  | 21560 |
| Q9UII2 | KQKIKMLKHDD  | 21603 | Q92847 | SRAWTESSINT  | 21581 | P20936 | QNQYTKTNDVR  | 21560 |
| P11309 | HLHSLSPGPSK  | 21603 | P05412 | QLMLTQQLQTF  | 21580 | P49662 | MTRYFYLFPGN  | 21560 |
| Q14449 | KLKHYCARIAL  | 21602 | P15391 | GGGRMGTWSTR  | 21580 | P40306 | VEETVQAMEVE  | 21560 |
| P02008 | VVSSVLTEKYR  | 21602 | P07199 | QAGVVRGLGHQS | 21580 | O88386 | GGVTGWKSKCC  | 21560 |
| P56846 | VAAGPNPTSVN  | 21602 | P15976 | TSTTVVAPLSS  | 21580 | Q08188 | IKAMLSIDVAE  | 21560 |
| P04075 | SESFLVSNHAY  | 21601 | P14902 | STTEKSLLEKEG | 21580 | P17480 | SSGSDSSSDSN  | 21559 |
| P15407 | DPLGSPDLLAL  | 21601 | P24158 | TLRRVEAKGRP  | 21579 | P54855 | LAKTGKKKKRD  | 21559 |
| Q16445 | KDTMEVSSSVE  | 21601 | Q9Y606 | LEGSEGDDGTD  | 21579 | Q13637 | TLRAENKSQCC  | 21558 |
| P26583 | EDEEEDEDEDE  | 21601 | Q9UF47 | KEGSRSYCTDS  | 21579 | Q92908 | RPDSWCALALA  | 21557 |
| Q9UL18 | HQDTLRTMYFA  | 21601 | P00519 | SVKEISDIVQR  | 21578 | P36269 | DLRKSGEAAGY  | 21557 |
| Q15631 | NKETAAACVEK  | 21601 | P22466 | AAASSEDIER   | 21578 | P31270 | EKKINRDLQY   | 21557 |
| P08047 | LQSINISGNFG  | 21600 | O00155 | AQAANTASASW  | 21578 | P48051 | DVANLENESKV  | 21557 |
| Q15417 | DYQYSDQGDIDY | 21599 | Q12988 | VFEVKDPVGT   | 21578 | P01761 | QGVLVTVSSGS  | 21556 |
| P07919 | CVAHKLFNNLK  | 21599 | Q14571 | VPHVNHMPPH   | 21578 | Q05472 | FGKKKGPANAS  | 21556 |
| Q14684 | PRRRPRAMDFF  | 21599 | Q92990 | HVTTNGLQDHS  | 21577 | P08069 | RALPLPQSSTC  | 21555 |
| P23416 | KIRHEDVHKH   | 21598 | O75311 | RHEDIHHQQD   | 21577 | O15225 | GESASILGAVT  | 21555 |
| P49863 | IKSNLVPPHTN  | 21598 | P01762 | WGEDLVTVSS   | 21577 | P35232 | AGQSVLLQLPQ  | 21555 |
| Q02747 | EICAYAACTGC  | 21598 | P78337 | ASGLNACQYNS  | 21577 | Q13371 | QKDLQEKISGK  | 21555 |
| P10266 | AKKRASTEMV   | 21598 | Q08379 | DENDEVKITVI  | 21576 | Q07020 | RGRRASRGYKN  | 21555 |
| P28074 | DLHEKYSGSTP  | 21598 | Q16550 | AYKSRDTAIKT  | 21576 | Q9NSI6 | ENVLDFNGCTL  | 21555 |
| P18031 | LCYRFLFNSTN  | 21598 | P25116 | LNNISYKLLT   | 21576 | P05062 | TQSLFTACYTY  | 21554 |
| O75954 | HIHRTGKKYDA  | 21598 | P02766 | STTAVVTPNKE  | 21576 | P11464 | MTVEVSDWTV   | 21554 |
| P45378 | PAKGKVGGRWK  | 21598 | Q01081 | RSRDRERSGRF  | 21576 | P04629 | QAPPVYLDVLG  | 21554 |
| Q13362 | RADELASDGRW  | 21597 | Q09328 | KGQVALCKDCL  | 21575 | P26651 | LPFNRISVSE   | 21554 |
| P02748 | GLPALEFPNEK  | 21597 | P35052 | LALTVARPRWR  | 21575 | P08962 | VKSIRSGYEVN  | 21553 |
| P00491 | MASIFLPDKAS  | 21597 | P51124 | SWIRKVTGRSA  | 21575 | P38405 | QRMHLKQYELL  | 21553 |
| P07101 | DTLAHALSAIG  | 21597 | Q99811 | SLHHSQVPTVN  | 21575 | P51161 | VTYERVSKRLA  | 21553 |

**ID:** ID from Uniprot Database (<http://www.uniprot.org/>) **Sequence:** Listed sequences match the Uniprot ID, but for the array experiments and for the computational predictions, the cysteines were changed to serine. **NA:** not available. **BLU:** biochemical light unit.

Table S1: Binding data from CAL peptide array.

| ID     | Sequence     | BLU   | ID     | Sequence     | BLU   | ID     | Sequence     | BLU   |
|--------|--------------|-------|--------|--------------|-------|--------|--------------|-------|
| O43653 | LGLLWGPQGL   | 21553 | P35218 | SFQATNEGTRS  | 21530 | P10264 | NCPSFQAQVQ   | 21509 |
| P42166 | CKVIKRGNGKH  | 21553 | P43694 | LADSHGDIITA  | 21530 | P20618 | IREETVSLRKD  | 21509 |
| P35442 | FSDLKYECRDI  | 21553 | Q08648 | PRWARGCSTGN  | 21530 | O15537 | MELLECVSKCA  | 21509 |
| O15016 | LASLTWYWDKVP | 21553 | Q05519 | DHHEEDMDMSD  | 21530 | P29017 | FKKHCSYQDIL  | 21508 |
| O15544 | PLSNFAFSYFP  | 21552 | O43280 | LPSLLLSLLPW  | 21530 | P49721 | LDNISFPKQGS  | 21508 |
| P04216 | SLLQATDFMSL  | 21552 | P37235 | LQCDPSSASQF  | 21530 | Q99536 | VLLVPGEKQCN  | 21508 |
| O95670 | PQVHPNYRISA  | 21552 | O75390 | GLMKFVDSKSG  | 21529 | P21754 | RTASHPVASE   | 21508 |
| Q15007 | ELSAWKFTPD   | 21552 | Q9Y625 | CIVLALQRLCR  | 21529 | P01591 | TALTPDACYPD  | 21507 |
| Q9Y3Y2 | VSPHLSYALTC  | 21552 | P78417 | QNSPEACDYGL  | 21529 | Q15650 | RRRLSVLQDLD  | 21507 |
| Q9Y3C1 | DSLQKRKMEVE  | 21551 | P01033 | CTWQSLRSQIA  | 21529 | O00299 | LAYEQVAKALK  | 21506 |
| P06340 | IMGTYSVSSVPR | 21551 | P50616 | SNQCFQPVMAN  | 21529 | P31943 | ENSSDFQSNIA  | 21506 |
| P34981 | CLASEVSFSQS  | 21551 | P45379 | RGKAKVTGRWK  | 21529 | Q14589 | QTAPQYSPKIN  | 21506 |
| Q99598 | TEMIDQEEGIS  | 21551 | P47985 | EFTSDDMVIVG  | 21529 | P22352 | RRQAALGVKRRK | 21505 |
| P49842 | TSGLTLRLPET  | 21550 | P16991 | SAPEAEQGGAE  | 21529 | P06326 | WGQGTLLIVSS  | 21505 |
| O15552 | EGMPSSDFTTE  | 21550 | P07093 | AVLFMGGQINKP | 21528 | Q14088 | QEANSKTSCPC  | 21505 |
| Q15906 | PRALRQKIVIK  | 21550 | P52306 | SLTEQRLTVES  | 21528 | Q99611 | DSSNASSEPPS  | 21505 |
| Q15375 | MLHLHGTGIVQ  | 21549 | P05538 | PRGPPAGLLH   | 21528 | P16403 | VKPKKAAPKKK  | 21504 |
| O14607 | FTLALSLSSSS  | 21549 | P23246 | EYEGPNKKPRF  | 21528 | O60542 | QLSAAACGCGG  | 21504 |
| P35611 | FLKKSKKSDS   | 21548 | P52657 | DGKNTGSNTTE  | 21528 | P26368 | DPDSYHRRDFW  | 21504 |
| Q08117 | THQEDDGEKSD  | 21548 | P01848 | NLLMTLRLWSS  | 21528 | Q9UL59 | HLHNNHRRGNL  | 21504 |
| P48506 | KYSGSKTDSSN  | 21548 | P25325 | DVISEGRGKTH  | 21528 | P24592 | GSSSCTPGSSG  | 21503 |
| P21266 | KMAQWGNKPV   | 21548 | Q9UH06 | YERKKYGFKKR  | 21528 | Q9UJTO | VQDLPRLSIAM  | 21503 |
| Q16676 | VENFTARISNC  | 21547 | Q9Y530 | RYTYLDWMWS   | 21528 | P24752 | GGASAMLIQKL  | 21503 |
| Q99490 | VGRADAPVALV  | 21547 | O75715 | ILAYLKQFKTK  | 21527 | P40337 | QERIAHQRMGD  | 21503 |
| P26373 | EAAEQDVKKKK  | 21546 | P25788 | KEEDESDDDNM  | 21527 | Q93097 | APKKAELWLDQT | 21502 |
| Q07283 | YIQEQRSQYRP  | 21546 | O00327 | PVDFSDLPWPL  | 21526 | P42684 | CVQEISDVVQR  | 21501 |
| Q13432 | NKADYSYSGTP  | 21546 | Q05925 | TTTVQDKDESE  | 21526 | O14558 | SAQAPPPAAAK  | 21501 |
| Q16186 | KKDEEEDMSLD  | 21545 | Q14654 | PKFSIPSDSL   | 21526 | P18283 | PDIKRLLLKVAI | 21500 |
| P09105 | HVISALVSEYR  | 21545 | P49903 | IEVAHKWPLKT  | 21526 | P30712 | QAMLLRIARIP  | 21500 |
| P08129 | TPPRNSAKAKK  | 21545 | Q92562 | MYREYIRNRYL  | 21526 | O14830 | KDSGCSPPGAH  | 21500 |
| Q9Y543 | PPCGPGLWRPW  | 21544 | P23415 | KIVRREDVHNQ  | 21525 | P23763 | IVVVIVIFYFFT | 21500 |
| Q99801 | HCVGSWSPAFW  | 21544 | P55895 | AKKSFLRLRFD  | 21525 | P54274 | KLKLISSESD   | 21500 |
| P36537 | FARKGKKGKRD  | 21544 | P03979 | LFGSGTTLVVT  | 21525 | P18887 | PHQLYGVVPQA  | 21500 |
| P10589 | FNWPMYMSIQCS | 21543 | O14523 | LCGIPGSLAG   | 21525 | P30679 | LARYLDEINLL  | 21499 |
| P28799 | PLRDPALRQLL  | 21543 | P30153 | AQEALTVLSLA  | 21524 | P05161 | RGGGTEPGGRS  | 21499 |
| Q99835 | DTELMADSDSF  | 21543 | P09471 | IANNLRGCGLY  | 21524 | P25098 | PLVQRGSANGL  | 21498 |
| O43193 | TETSDANVKTMG | 21542 | P01913 | HSGLQPTGFSL  | 21524 | Q9Y6D0 | RGSPFPMPMAGG | 21498 |
| P23083 | SDDTVVYYCAR  | 21542 | P45974 | GYIFYFQQRVAS | 21524 | P31391 | KRIPLTRTTTTF | 21498 |
| Q06136 | REKSENADKTA  | 21541 | Q92561 | SKCTCNISVGR  | 21524 | P00938 | PEFVDIINAKQ  | 21498 |
| P51878 | LTRDFYLFPGN  | 21541 | P22748 | MLACLLAGFLR  | 21523 | O75333 | GVPGAWPGLPV  | 21498 |
| P16562 | KATCLCENKIY  | 21541 | Q9UMX6 | LAQQRKKSAMF  | 21523 | Q13072 | PEDGTALCFIF  | 21497 |
| P55851 | MAACTSREAPF  | 21541 | P46091 | TKNLCLETAQ   | 21523 | P33764 | KDCPSEPPCSQ  | 21497 |
| P07911 | LLSATLTLTFQ  | 21541 | Q01085 | AGYGMASYQTQ  | 21523 | Q92750 | YSRALYLALLK  | 21497 |
| P07099 | IRKFLSVLERQ  | 21540 | Q9Y2K6 | EQKIEAETRAV  | 21523 | P23567 | SAIVEQSWNDS  | 21497 |
| Q14863 | NTSKLNVFQIP  | 21540 | P01912 | HSGLQPRGFSL  | 21522 | O95399 | ETPDCFWKYCV  | 21497 |
| P04281 | PPQGDKSRSPR  | 21540 | P07510 | GDPRPYLPSPD  | 21521 | P32314 | AKTQNKQQRKK  | 21496 |
| P23411 | LPPGLAVKELK  | 21540 | O95450 | EMRKKEMLGKF  | 21521 | P05155 | VFMGRVYDPR   | 21496 |
| Q15645 | IEGFLQALSLA  | 21540 | Q16602 | NVLLKPENLYN  | 21521 | P01569 | ANLQERLRRKE  | 21496 |
| Q9Y5P2 | IEEVPGTKGSP  | 21540 | P06468 | LDQTLLELNNL  | 21521 | P49720 | ITRRTLKARMD  | 21496 |
| P01771 | WGQGVLTVTSS  | 21539 | P38607 | DIQQAFLNLED  | 21521 | Q99460 | EPPEFFEYIDD  | 21496 |
| P04155 | IDVPEEEECF   | 21539 | P06493 | FNDLDNQIKKM  | 21520 | O76024 | DDFFFPFLSAA  | 21496 |
| Q13653 | PVLLGRLPFPH  | 21538 | P25763 | EPKKSRRCVLL  | 21520 | O75695 | FYNFADIQMG   | 21496 |
| P52951 | SHQQLLEQARP  | 21538 | Q14344 | LHDNLKQLMLQ  | 21520 | O95337 | GRSPPGTSGST  | 21496 |
| O14880 | SGLGSFGPKCC  | 21538 | P13807 | SPTSSLGEERN  | 21520 | P78333 | ISVVMILLPGIW | 21495 |
| P48741 | NRLVNHFMEEF  | 21538 | P46597 | GAIFYDAILARK | 21520 | P49643 | EGLEDYFSEDS  | 21495 |
| P12751 | AIRRLKELKDQ  | 21538 | P06280 | NTMQMSLKDLL  | 21519 | Q16288 | KATPIYLDILG  | 21495 |
| P57075 | AFNWRNWNISGN | 21538 | P78396 | LMEPPAVLLLQ  | 21519 | O15529 | GTGGQVACAEN  | 21494 |
| P26374 | NLESPEKHLQN  | 21537 | P49674 | QTSVPFDHLGK  | 21519 | Q13636 | KPTMQASRRCC  | 21494 |
| P39027 | HTGSGKLGFF   | 21537 | Q13488 | LSPTFAATDD   | 21519 | P52788 | VFYTVWKKAKP  | 21494 |
| Q13227 | QHSQNPFRFYHK | 21536 | P57081 | KMRPGEATLSC  | 21518 | P51571 | LAFAKSHIQA   | 21494 |
| Q08257 | SGATGKMLLL   | 21536 | Q9Y4E6 | AHDGKEHRFMV  | 21518 | P21580 | NECFQFKQMYG  | 21494 |
| P49427 | DDEDSDGTEES  | 21536 | Q14691 | IRQGVLLEHLS  | 21518 | P51580 | LFELKLYLLEK  | 21494 |
| P35544 | TLEVAGRMGLG  | 21536 | P36404 | DDISSRIFTAD  | 21517 | Q15649 | GIVEPSQNEES  | 21494 |
| P01780 | MDVWVGQTPVT  | 21535 | O95429 | AILEKLEKKGL  | 21517 | Q9Y4E8 | DIENENCMHTN  | 21494 |
| P10696 | TLLLLGTATAP  | 21535 | P30711 | KLMPWVLMIR   | 21517 | O75330 | RAPMECQESWK  | 21493 |
| O00422 | APPPSGRMRPY  | 21535 | P11465 | RIGLLPLLNT   | 21517 | Q14320 | PEKKWKDYTIR  | 21493 |
| P30154 | AQEASVLAALA  | 21534 | P08708 | GMNFKTTPRGV  | 21517 | P35998 | FSATPRYMTYN  | 21492 |
| Q16772 | ALAEARKIFRF  | 21534 | O75317 | SGYILFYQSRD  | 21517 | O95859 | SFNTHFEMEEL  | 21492 |
| P02814 | PGIFFPPPPQP  | 21534 | P21181 | ETQPKRKCCIF  | 21516 | P48788 | EGRKKMFESES  | 21492 |
| P31939 | LAHTNLRLFHH  | 21534 | P01148 | LIEETGQKKI   | 21516 | O95966 | GEPTSDLSDD   | 21491 |
| Q9UN79 | PPVPSGFSGSM  | 21534 | O76070 | EVAEEAQSGGD  | 21516 | Q00535 | QHPYFSDFCPP  | 21491 |
| Q99727 | LRKEFVDIVQP  | 21534 | Q04206 | DFSALLSQISS  | 21516 | Q14457 | LAWVSSQFYNK  | 21491 |
| O75643 | VKEAETDSDS   | 21534 | P08727 | HYNNLSASKVL  | 21515 | P28065 | LGNELPKFYDE  | 21491 |
| Q12849 | ELFLNSCPKKG  | 21533 | P05154 | NILFLGKVNRP  | 21514 | P11488 | IKENLKDCGLF  | 21490 |
| O60841 | IVELKKVFEI   | 21533 | O43236 | HKIQKQMKENY  | 21514 | P32971 | VLSIFLYSNSD  | 21490 |
| Q9Y342 | AATSQMAGGYA  | 21533 | P11441 | VTETMEKGFSG  | 21514 | P08575 | GPASPALNQGS  | 21489 |
| P50453 | SILFCGRFSSP  | 21533 | Q9UK10 | DTLLSLFLNDT  | 21514 | P07492 | REGRNPQLNQ   | 21489 |
| P30054 | YAKDIGFIKLD  | 21533 | Q92729 | ALEYLEGLES   | 21513 | O15372 | FMAQALQEYNN  | 21489 |
| Q99541 | QETQRSEHKTH  | 21532 | Q02094 | DSVYGWVKPKTR | 21513 | P04156 | LISFLFLIVG   | 21489 |
| P34925 | TEFHAAAGAYV  | 21532 | Q14781 | TSVGFFNLRYH  | 21512 | P19438 | AALPPAPSLLR  | 21489 |
| P40200 | SDLPYHEMETL  | 21532 | Q14119 | LPQALTPSPPW  | 21512 | P51965 | MARQWTKRYAT  | 21489 |
| P53007 | VKLLNKVWKTD  | 21532 | P51654 | ISVVCFFFLVH  | 21511 | Q15041 | KLLKQKEKKNE  | 21489 |
| O75841 | GTMFYVSRJIEY | 21532 | Q9Y4H2 | PAPCPTTYAQH  | 21511 | P49682 | SETSEASYSG   | 21488 |
| P42331 | VKSMKEPKTEA  | 21532 | P47210 | EKNMSIKKLWK  | 21511 | P55347 | GLVLENSDSLQ  | 21487 |
| P48167 | FFNVIVYSIYL  | 21531 | P35626 | PSLCHRNSNGL  | 21510 | P07737 | EMASHLRRSQY  | 21487 |
| P48556 | IEYARQLEMIY  | 21531 | P45973 | AENKEKETAKS  | 21510 | P42167 | NFLHVDPRKSN  | 21487 |
| Q9Y5X2 | CSPPEDGLCPH  | 21531 | P43080 | EGADEAAEAAG  | 21510 | O14788 | YFGAFKVRDID  | 21487 |
| Q9Y2L1 | GPKKKKMKLGK  | 21531 | P48552 | GSVLTIKKESE  | 21510 | Q9UMR3 | FRDSSRLTDIE  | 21487 |

ID: ID from Uniprot Database (<http://www.uniprot.org/>) Sequence: Listed sequences match the Uniprot ID, but for the array experiments and for the computational predictions, the cysteines were changed to serine. NA: not available. BLU: biochemical light unit.

Table S1: Binding data from CAL peptide array.

| ID     | Sequence     | BLU   | ID     | Sequence     | BLU   | ID     | Sequence     | BLU   |
|--------|--------------|-------|--------|--------------|-------|--------|--------------|-------|
| P41182 | TDLPPPELPKAC | 21486 | Q92558 | DSEFDEVDWLE  | 21463 | Q16651 | LGLLSPWLSEH  | 21442 |
| O75419 | KFLDALISLLS  | 21486 | P16389 | YVNITKMLTDV  | 21461 | O94822 | STCPLCRETFF  | 21442 |
| O95249 | CTILLLLYAFH  | 21486 | P16104 | GKKATQASQEY  | 21461 | Q99929 | LLDFSSWLGGY  | 21441 |
| P36551 | EVLRHPRDWVR  | 21486 | P01236 | LKCRHNNNC    | 21461 | P06396 | PLDRAMAELAA  | 21441 |
| P17096 | GISQESSEEEQ  | 21486 | Q9UBK7 | TPSEEVASPHS  | 21461 | Q15654 | QELSATVTTDC  | 21441 |
| Q07325 | KSQRSRQKKT   | 21486 | P27449 | GLIVALILSTK  | 21461 | Q9Y316 | VSAAAGALTVH  | 21441 |
| Q14695 | KRGQSETFNIC  | 21486 | P24557 | KNGVYIKIVSR  | 21460 | Q13057 | SLPNTLVFGQH  | 21441 |
| Q16635 | EQLHNLHLPGR  | 21485 | P51966 | TKKYGEKRPVD  | 21460 | O15541 | EDPDEDAIPIT  | 21441 |
| P09327 | QQNLKKEKGLF  | 21485 | Q15853 | NLEMVGEGRQ   | 21460 | Q14627 | PKMIPEFFCDT  | 21440 |
| P19440 | DSRKGGEPAGY  | 21484 | P10620 | AYRLLSKSLYL  | 21459 | P47992 | QSTNTAVTLTG  | 21440 |
| Q14199 | RKKRSKDFSGQ  | 21484 | P01914 | HSGLPPTGFLS  | 21459 | P28347 | AQHIIYRLVKD  | 21440 |
| P22304 | QGGDLFQLLMP  | 21483 | P09429 | DEDEEEDDDDE  | 21459 | P21205 | LFLEVFEDQEV  | 21440 |
| P40238 | SYLPLSYWQQP  | 21483 | P20701 | EKDSSEGGGKD  | 21459 | O14556 | DLLRYMFSRDK  | 21439 |
| Q9Y3B3 | DKRRTTTTRVGS | 21483 | Q02878 | TNGIYPHKLVF  | 21459 | Q92786 | SPNCLQELLHE  | 21439 |
| P11172 | AWEAYLSRLGV  | 21482 | Q99969 | QFAFSKALPRS  | 21459 | P01270 | DVNVLTAKKSQ  | 21439 |
| P01137 | SNMIVRSCKCS  | 21482 | P28161 | VFTKMAVWGNK  | 21458 | P51693 | NPTYRFLERP   | 21438 |
| P08582 | ALAARLLPPAL  | 21481 | P28001 | KTESHHKAKGK  | 21458 | O15263 | GLPGTKCKCKP  | 21438 |
| Q9Y5T5 | QAYLLFYERIL  | 21481 | O75367 | YVQEMAKLDAN  | 21458 | O75879 | IKEILEKKLSL  | 21438 |
| Q14699 | EVRELGTVEEN  | 21481 | P41273 | IPAGLPSRSE   | 21458 | P02096 | AVASALSRYH   | 21438 |
| P39086 | GIRKQSSVHTV  | 21479 | Q15633 | LQYLKIMAGSK  | 21458 | P04062 | YSIHTYLWHRQ  | 21437 |
| P14770 | GLLCATTEALD  | 21479 | P57087 | NDFKHTKSFII  | 21458 | P40222 | ELRSLCCSICS  | 21437 |
| Q15695 | RDRTVQSPQSK  | 21479 | Q9UHD4 | QWQQKGRRLHSY | 21457 | P55808 | NCFRTHPENV   | 21437 |
| P06133 | FVRTGKKGKRD  | 21479 | O15488 | RIQEKLDRFLQ  | 21457 | Q9UPC5 | AVKIQSSSKST  | 21436 |
| P48060 | QLKYPNVLVLLD | 21478 | P26927 | VDWIHKVMRLG  | 21457 | P55795 | ENSSDYQSNLA  | 21436 |
| P56915 | EEGKSDLDSDS  | 21478 | O43242 | EMAEDDDDSFP  | 21457 | P01857 | TQKSLSLSPGK  | 21435 |
| P51784 | SPPSSEFMDVN  | 21478 | P53803 | RTKRLVVFDDAR | 21457 | P13862 | SNFKSPVKTIR  | 21435 |
| P21283 | YKIDCNLLEFK  | 21478 | P08112 | SNMIVKSKCKS  | 21457 | Q9Y5K2 | TEWIEKTVQAS  | 21435 |
| P17405 | RFLSWPRPLFC  | 21477 | P09936 | QFSVALCKAA   | 21457 | O00631 | LMWLLVRSYQY  | 21435 |
| P31358 | ANAIHLCFCFS  | 21477 | P08263 | SLEEARKIFRF  | 21456 | Q99961 | SYVEVLVPLPQ  | 21435 |
| P78415 | ITKMTLTQVST  | 21477 | Q9UBX0 | AKKNFNTNLL   | 21456 | P20396 | RAAWVREPLEE  | 21435 |
| P20336 | QQVPPHQDCAC  | 21477 | O43426 | KASPTLDFTER  | 21456 | O95935 | LSSSQVSAHMY  | 21435 |
| Q13285 | LLIEMLQAKQT  | 21477 | Q16762 | SRVSQKSEKA   | 21456 | P16662 | FARKAKKGKND  | 21435 |
| O14609 | DIQSYTTDFSF  | 21477 | Q07131 | IVSGNLRILDH  | 21456 | P30530 | SPAAPGQEDGA  | 21435 |
| P80404 | NIFSDILADFK  | 21476 | O60908 | IMAAPSAWFLE  | 21456 | P49910 | QRIHMRENLLM  | 21435 |
| P51451 | TATERQYELQP  | 21475 | P23769 | PHPPSMVTAMG  | 21455 | Q9UEY8 | KKNKKKEKVEA  | 21434 |
| P02100 | AVAIALAHKYH  | 21475 | O43502 | RKRSRDPEEEL  | 21455 | O95394 | GGIGERPQPGF  | 21434 |
| O75874 | NLKIKLAQAKL  | 21475 | P08886 | QGGQQAGGGCC  | 21455 | O00303 | QIALNEKLVNL  | 21434 |
| P43686 | KKDEQEHEFYK  | 21475 | P50748 | EILKMFSLGLS  | 21455 | Q15109 | PEAGESSTGGP  | 21434 |
| P04003 | SARQSTLDKEL  | 21474 | Q92851 | RPPMRRWSSVS  | 21454 | Q13642 | QVYCPDCAKKL  | 21434 |
| O60583 | DSLLSAQGMNM  | 21474 | Q13523 | ALQHAFIQEKI  | 21454 | P55327 | EPLPEKTQESL  | 21433 |
| P29016 | YMRRRSYQNP   | 21474 | P43378 | SGQNLLAVESQ  | 21454 | Q9UMW8 | AYLLVYMKMEC  | 21433 |
| Q06547 | MTRLQTNKEAV  | 21474 | Q15286 | TKNSKRKKRCC  | 21454 | P15498 | NYVEEDYSEYC  | 21433 |
| P11021 | GEEDTAEKDEL  | 21474 | Q00341 | APKTLWPWPKR  | 21454 | O15091 | PTKWLCCLHQKT | 21433 |
| Q92604 | NIQYFYHCLF   | 21474 | Q13347 | DPQYFEFEFEA  | 21453 | Q16559 | VSPGPGSHHIP  | 21432 |
| P09341 | IEKMLNSDKSN  | 21473 | P37290 | LRMMDGDLSSP  | 21453 | P16157 | HSKDHTSTPNP  | 21431 |
| P50219 | PPRPSHQPAQ   | 21473 | Q16665 | EELLRALDQVN  | 21452 | P56180 | MTSSDVVAGSD  | 21431 |
| P16949 | KRDPADETead  | 21473 | P17861 | RHQPSWKPLMN  | 21452 | Q02547 | RAKIDNYIPF   | 21431 |
| P30926 | ASEGPYAAQRD  | 21472 | P29992 | LQLNLKEYNLV  | 21451 | P15822 | DDDEDRLVIAT  | 21431 |
| P55259 | VLLTVLLAWLF  | 21472 | P27694 | LVMSIRRSALM  | 21451 | Q14549 | QHQQMEQGARF  | 21430 |
| Q99878 | PKKTESHHKTK  | 21472 | Q92993 | TPKDWSKRGKW  | 21451 | P10144 | VHWIKTKMKRY  | 21430 |
| Q93099 | TPNSRNPAPEN  | 21472 | P17013 | KHQRTHTGQKP  | 21451 | P53801 | EENPYARFENN  | 21430 |
| O75822 | GGYVQDYEDFM  | 21472 | P56377 | PRSVLEEIGLT  | 21450 | P46779 | KRKRTRPTKSS  | 21430 |
| P08519 | VTWIEGMMNRN  | 21471 | Q9UKS7 | SHIVRGEHTFH  | 21450 | Q02763 | AGIDCSAEAEA  | 21430 |
| Q09155 | ARPGASPTAP   | 21471 | Q13686 | EVKRARINPDS  | 21449 | O43504 | GITVAVHKMAS  | 21430 |
| Q9Y285 | EPRPPPTQEAA  | 21471 | P05549 | KSSDKKEKHKR  | 21449 | Q14140 | LDHIMEVLVGS  | 21430 |
| P20366 | RSAMQNYERRR  | 21471 | P43304 | PIPVDRSCGGL  | 21449 | Q92524 | KLESKLDYKPV  | 21429 |
| P35916 | ESRHRQESGFR  | 21471 | P22415 | GLEVVIKNDSN  | 21449 | P47901 | DGEGTAETIIF  | 21429 |
| P33172 | PSKKPVADYFL  | 21470 | P42285 | RDIVFAASLYL  | 21449 | P51684 | ADNDNASSFTM  | 21428 |
| Q16620 | KASPVYLDILG  | 21470 | P53990 | SRRFEELKKKT  | 21449 | P32248 | VEAETTTTFSP  | 21428 |
| O75787 | YRMTNQKIRMD  | 21470 | P46439 | LFGKSATWNSK  | 21448 | Q04609 | QAAAETLSEVA  | 21428 |
| P15880 | QRTQAPAVATT  | 21469 | P11142 | ASSGPTIEEVD  | 21448 | Q03393 | TDNNIVVYKGE  | 21428 |
| Q15397 | GIEILLEKLST  | 21469 | P48147 | IARCLNVDWIP  | 21448 | P40855 | PGASGEQCLIM  | 21428 |
| P01019 | LGRVANPLSTA  | 21468 | Q15814 | LPHEELNIQWD  | 21448 | Q99714 | IRLDGAIRMQP  | 21427 |
| P18433 | IDAFSDYANFK  | 21468 | P37288 | SKSIKFIPIVST | 21448 | P06400 | DSMDTSNKEEK  | 21427 |
| P53816 | VMFSRNKRQKQ  | 21467 | Q13065 | NCFLNLSPRKP  | 21447 | Q15771 | SISYLTCCNFN  | 21426 |
| P35716 | EANFSDLVFTY  | 21467 | P52823 | SHIKRTSHESA  | 21447 | P28370 | KTPMVKFSAFS  | 21426 |
| P07814 | AKYYTLFGRSY  | 21467 | P55916 | MKVQMLRESFP  | 21447 | O43435 | VAGRTAGDRLC  | 21426 |
| P32970 | ETFFGVQWVRP  | 21467 | Q14004 | VKSEEDRSRWA  | 21446 | P54219 | EDSDEEPPDHEE | 21426 |
| P35125 | ESDYEKYSMLQ  | 21467 | Q9P0M6 | YVQEMAKLDAK  | 21446 | P17031 | EHQVRHTGEKP  | 21426 |
| Q92187 | LKLTTGKCVKQ  | 21466 | P27987 | LTEMSSQDAPLA | 21446 | O95843 | DKAGLGKVKMK  | 21425 |
| Q15382 | ASQGKSSCSVM  | 21466 | P51665 | DVKKEEKKKK   | 21446 | O43765 | TPSASNDQDQE  | 21425 |
| P19065 | ILIIIVFYFSS  | 21466 | P01375 | SGQVYFGIAL   | 21446 | P23381 | MTPRKLSFDFQ  | 21425 |
| O60664 | GITEKAPEEKK  | 21466 | O15482 | SKDSGPPADGP  | 21446 | Q99757 | QLEAFLKLLIG  | 21425 |
| P52735 | PSTYVEEEGIQ  | 21466 | Q06545 | LPGVLCRSHPK  | 21445 | P30291 | KMNRSVSLTIY  | 21425 |
| P10412 | AKPKVAAAKKK  | 21465 | P41235 | PQPTITKQEV   | 21445 | Q9ULK2 | TNRTGRIRTLF  | 21425 |
| P08833 | PNCQIYFNVQN  | 21465 | Q92674 | RAEGINCNNQY  | 21445 | P08571 | LVLQGGARGFA  | 21424 |
| P55210 | SMLTKELYFSQ  | 21465 | Q9UL17 | AEGQFYNYFPN  | 21445 | Q99958 | AAPYSYDCTKY  | 21424 |
| Q9UD71 | PQRPSPEPGR   | 21465 | Q08623 | QPELFGPLSYE  | 21444 | Q92769 | KGTKSEQLSNP  | 21424 |
| P35612 | KKSKKKKEKVES | 21464 | P20719 | SMAAAGGAFRP  | 21444 | P28360 | AHVGYSMYHLT  | 21424 |
| P32302 | ESENATSLTTF  | 21464 | P00995 | TSILIQKSGPC  | 21444 | Q15391 | GNTTLESTDTL  | 21424 |
| P06126 | LALWFRKRRCF  | 21464 | Q15262 | YDVALEYLESS  | 21444 | P17080 | TTALPDEDDDDL | 21424 |
| Q02127 | VTDAIGADHRR  | 21464 | P38606 | DMQNAFRSLED  | 21444 | P07602 | AVEHCKRHVWN  | 21424 |
| Q15583 | AEMELQAKLTA  | 21464 | P09002 | CTGDQWPFRRWS | 21444 | P15157 | DWIIHYVPKKP  | 21424 |
| P29144 | PIMYPDPYCVF  | 21464 | P10912 | VSTDDLKMKIMP | 21443 | P78552 | VLIENLKKASQ  | 21423 |
| Q92890 | GQSLRKRGKRP  | 21464 | Q99081 | LSETNPMGMHM  | 21443 | O14818 | ENEKKKKQKKAS | 21423 |
| P23443 | SKRPEHLRMNL  | 21463 | Q9UHL8 | NSRLQKREANM  | 21443 | P07988 | SPLQCIHSPLD  | 21423 |
| P22531 | PCQPKCPPKSK  | 21463 | O00559 | KEQNKIGVKLS  | 21443 | Q13207 | RALSPGRESFPK | 21423 |
| P56703 | TEKRKEKCHCI  | 21463 | P05204 | AQKAEGAGDAK  | 21442 | P25787 | TEVKDYLAIA   | 21422 |

ID: ID from Uniprot Database (<http://www.uniprot.org/>) Sequence: Listed sequences match the Uniprot ID, but for the array experiments and for the computational predictions, the cysteines were changed to serine. NA: not available. BLU: biochemical light unit.

Table S1: Binding data from CAL peptide array.

| ID     | Sequence     | BLU   | ID     | Sequence     | BLU   | ID     | Sequence     | BLU   |
|--------|--------------|-------|--------|--------------|-------|--------|--------------|-------|
| P23467 | EYHRDPVYSRH  | 21422 | P09486 | KQKIDKDLVI   | 21402 | P17481 | WKKENNKDKFP  | 21381 |
| O14653 | VVMFLVVQYLT  | 21421 | P12081 | KRRTGQPLCIC  | 21402 | P01111 | QGCMGLPCVVM  | 21381 |
| P18564 | EKQKVDLSTDC  | 21421 | O15119 | AKPDRSRASAP  | 21402 | O60880 | REDPDVCLKAP  | 21381 |
| P01112 | PGCMSCKCVLS  | 21421 | P23193 | CNECGNRWKFC  | 21402 | Q03188 | ESVLLFTQIKR  | 21380 |
| P01850 | VLAMAMVKRKDF | 21421 | P52209 | GGTVSSSSYNA  | 21401 | P04440 | RRSKKVQRGSA  | 21380 |
| P22309 | RVKKAHKSPTH  | 21421 | P05556 | TTVVNPKYEGK  | 21401 | P17812 | TELKFPSINHD  | 21380 |
| P26378 | VSFKTNKAHKS  | 21420 | Q99437 | ILQTSRVKMGD  | 21401 | P18754 | TVLLVKDKESQ  | 21380 |
| P19075 | SMVLYCQIGNK  | 21420 | P15151 | SSQDPQTEGTR  | 21400 | P04053 | LDYIEPWERN   | 21380 |
| Q03431 | ALLQEEWETVM  | 21419 | P11498 | LEGDDLILEIE  | 21400 | P17980 | AKKKANLQYYA  | 21379 |
| O75771 | EQSATLQGDQT  | 21419 | P35717 | LRARHLRDYPD  | 21400 | P26022 | IQPHGGAQYVS  | 21379 |
| Q92556 | PSNYDFVYDCN  | 21419 | Q15008 | RVQKLSRVINM  | 21400 | Q15031 | RTALINFLVQD  | 21379 |
| P54840 | GKKKLHGEYKN  | 21418 | Q92537 | YTDIDIPLLKEA | 21400 | P78381 | LPKLLTKVKGS  | 21379 |
| P31271 | KKVINKLKTTS  | 21418 | P55107 | PNMSVDTCACR  | 21399 | P01919 | IRQRSRKGLLH  | 21378 |
| P18850 | HVVSTIPESLQ  | 21417 | P00354 | VDLMAHMASKE  | 21399 | Q9ULC3 | NRNPFSSCSIP  | 21378 |
| O43837 | SVIGHLQTKGS  | 21417 | P27918 | PACKDPPEEEL  | 21399 | P18577 | FWKFPFLAVGF  | 21378 |
| Q03169 | SRPLFSLIKVG  | 21417 | Q05209 | KGPRDPPSEWT  | 21399 | Q16650 | ISGYGFFYSHS  | 21378 |
| Q16222 | NGVHELKNGI   | 21417 | P25791 | IYEWTKINGMI  | 21399 | Q99735 | LNIKKLRQF    | 21377 |
| O00744 | CKVTWVNVCK   | 21417 | O75949 | PALEEGLTREE  | 21399 | P01563 | TNLQESLRSKE  | 21377 |
| Q9Y284 | LQNPQPMTPPW  | 21416 | P21506 | YQTNHIRENAY  | 21399 | P13726 | SWKENSPLNVS  | 21375 |
| P01343 | RGSAGNKNYRM  | 21416 | P17516 | DHPDYPFSDEY  | 21398 | Q15672 | MEGAWSMSASH  | 21375 |
| P29350 | KEKSGSLKRRK  | 21416 | P01825 | WQGGSGLTVSS  | 21398 | O15078 | EEESPVNFIPI  | 21375 |
| P10082 | VRSRSEGPDLW  | 21416 | P04070 | DKEAPQKSWAP  | 21398 | P13796 | ACLMGKGMKRV  | 21374 |
| P20132 | EQLGMTNRLPK  | 21416 | P22735 | ETIPMASRGA   | 21398 | P42830 | QKILDGKNKEN  | 21374 |
| P50749 | LEEAETPATI   | 21416 | P40225 | YTHSQNLSEQE  | 21398 | Q92574 | MDYNETHHEHS  | 21374 |
| Q14839 | EPTPQVAQQQ   | 21415 | P25490 | ILTHAKAKNNQ  | 21398 | P49454 | ESKGSSENCKVQ | 21373 |
| Q9UDY4 | KEVLRKHLPAS  | 21415 | O15342 | ETIWLYKYHWP  | 21398 | Q9P003 | LYSMILALIND  | 21373 |
| P20337 | TPPLLQKNCSC  | 21415 | P19622 | TTAKEGKSDSE  | 21397 | P80217 | PRTAGPSSLHL  | 21373 |
| P15927 | DDHDFKSTDAE  | 21415 | Q06203 | LTGKYPVELEW  | 21397 | O15056 | ALQVFDPLAKT  | 21373 |
| P51668 | HAREWTKQYAM  | 21415 | P98175 | KTMVTRFNEAQ  | 21397 | P01918 | IHHRSQKGLLH  | 21372 |
| O60811 | PSEELHLCC    | 21415 | P49815 | ISSVEDFTEFV  | 21397 | P07225 | CPSVWKKTKNS  | 21372 |
| O95096 | HPLVQAQQWTFW | 21414 | Q08722 | FKESKGMNMDE  | 21396 | O00411 | EQVKRSTYFFS  | 21372 |
| Q14651 | CLMGKGLNRK   | 21414 | Q13003 | ACSTSLAPVFP  | 21396 | Q15836 | IIIIHVWVSS   | 21372 |
| Q16822 | LEALERRVHKM  | 21414 | O75821 | LNVEWAKPSTN  | 21396 | O60765 | NHYKIHIEEDP  | 21372 |
| Q15238 | GIGRLPLLNI   | 21414 | P15260 | YRPTEDSKEFS  | 21396 | P41732 | RFITANQYEMV  | 21371 |
| P48380 | RRDCGVIAVVP  | 21414 | Q16576 | VTTSELEGQS   | 21396 | Q15056 | PREEVVQKEQE  | 21370 |
| O95343 | SVTSSDSECDV  | 21414 | O60810 | SFYDLEADQYC  | 21396 | P35244 | QFYPLGIVQHD  | 21370 |
| Q15750 | DHGEQSVVTP   | 21414 | Q13794 | NLISKLFCSGT  | 21395 | O14894 | GDCRKKQDTPH  | 21370 |
| Q9UI12 | SEQPQTAARS   | 21414 | O14735 | ALDAADRKKK   | 21395 | P31942 | REMEEGEYEEA  | 21370 |
| P49336 | PPQYSHQTHRY  | 21413 | P57059 | PCSLGTFVLVQ  | 21394 | P21695 | IHCLQNHPEHM  | 21369 |
| P09211 | VNLPINGNKQ   | 21413 | P47986 | ISREWTKQYAM  | 21394 | P38646 | EKQEDQKEEKQ  | 21369 |
| P49840 | TDATPTLTNS   | 21413 | Q05086 | AITYAKGFGML  | 21394 | P01344 | GAPPENASNRK  | 21369 |
| P20933 | NQPTTEKVDIC  | 21412 | Q9Y2D2 | DPKPAGNPTKA  | 21394 | O43776 | LYPRFVQRCPT  | 21369 |
| P06756 | PHENGEENSET  | 21412 | P34062 | DAHLVALAERD  | 21393 | P17542 | MLPAADGAGPR  | 21369 |
| P26010 | PRFQEADSPETL | 21412 | P23468 | EYLGSPDHYAT  | 21393 | Q01831 | AASHLFPFEKL  | 21369 |
| P42681 | LRAVTEIAETW  | 21412 | Q9Y5S9 | RRSRSPDRRRR  | 21393 | O14802 | DTNEFHIPLVT  | 21368 |
| Q9UKP6 | RPAEPGRPAPA  | 21412 | P21675 | IAGDSLDLSDSE | 21393 | NA     | WQGGDLTVSS   | 21367 |
| Q15389 | STTMMIRPLDF  | 21411 | Q93075 | LRENTSRLYS   | 21393 | P29373 | DVVCVTRVYVRE | 21367 |
| P40429 | TEVLKTHGLLV  | 21411 | Q03924 | STLTPHKTIHI  | 21393 | P29377 | EFQVLVKKISQ  | 21367 |
| Q07244 | NSVKQSVKGF   | 21411 | P78423 | CGSNSVYLVVP  | 21392 | O14524 | CPAITQNNFLT  | 21367 |
| P10646 | IAYEEIFVKNM  | 21411 | O60907 | DGSVCVLDLRK  | 21392 | P11215 | SEGPPGAEPQ   | 21366 |
| P31483 | SGYRVAGYETQ  | 21411 | P09110 | GAAAVFEYPCN  | 21392 | O95716 | APAPQPSSCSC  | 21366 |
| O00294 | LSSPDGKLACE  | 21411 | Q00613 | EPPKAKDPTVS  | 21391 | Q16890 | SRTKEEELQC   | 21366 |
| P17066 | PSTGPPIIEVD  | 21410 | Q15714 | QPASQVSGGPTA | 21391 | Q99684 | RRHRETQHGLK  | 21365 |
| Q9UBY9 | VQQTFRTEIKI  | 21410 | P22314 | VEVPYVRYTIR  | 21391 | P16401 | PKAKKAAAKKK  | 21365 |
| O60613 | EEFLSEKLERI  | 21410 | Q05877 | AVVQFEQHKRH  | 21390 | Q9UKV0 | YDPLMLKKPNS  | 21365 |
| P10600 | SNMVMVKSCKS  | 21410 | P42574 | SMLTKELYFYH  | 21390 | Q01804 | EISDSEDDSCK  | 21365 |
| Q15653 | ERQGSAPAGSG  | 21410 | P30048 | ASKEYFQKVNQ  | 21390 | P01766 | YGVSVWVGQGT  | 21365 |
| P04035 | DLQGACTKKTA  | 21409 | P35523 | TDEDEDELIL   | 21389 | P31260 | IRELTANFNFS  | 21365 |
| P19823 | VPQLYSFLKRP  | 21409 | P56537 | SMRDSLIDSLT  | 21389 | Q13185 | TWHSCEDEAQ   | 21364 |
| P00747 | VTWIEGVMRNN  | 21409 | Q92748 | RKYQEMTGQVW  | 21389 | Q15849 | IITKYQAYDVS  | 21364 |
| Q13049 | YSYHLRYSYTP  | 21408 | Q08378 | DLSMTQKDKFM  | 21388 | O95947 | GYLDVGSKPMY  | 21363 |
| P04280 | PQGGPRSPRPQ  | 21408 | P17693 | AAVLWRKKSSD  | 21388 | P36021 | LPSPNPPEEPI  | 21363 |
| Q14188 | EDDEEDSSSPE  | 21408 | P52926 | ETSSQSAEED   | 21388 | P10159 | EAAVAIKAMAK  | 21362 |
| P14317 | LFPANYVKLLE  | 21407 | P49768 | MDQLAFHQFYI  | 21388 | P51151 | HRKPKPSSSCC  | 21362 |
| P34931 | PATGPTIEEVD  | 21407 | Q12913 | TTFGKTNGYIA  | 21388 | P38567 | LFLISSVASL   | 21361 |
| O95755 | ESKRPSLGGCC  | 21407 | P15918 | DSLESQDSMEF  | 21388 | Q13418 | IVPILEKMQDK  | 21361 |
| P48307 | SRIRKIRKQKF  | 21407 | P31629 | KDPSKESQLH   | 21388 | Q15235 | GPCHGNQTESH  | 21361 |
| Q9UDW1 | WKHIKHKYENK  | 21407 | P10071 | KRLQPTENRS   | 21387 | P23469 | IDIFSDYANFK  | 21361 |
| P36543 | FGANANRKF    | 21407 | O14842 | AARTQGGKSQK  | 21387 | P54578 | RVEIMEESEQ   | 21361 |
| O75325 | ETLLPLLSQNS  | 21406 | P06401 | GMVKPLLFHKK  | 21387 | O14929 | YRRVIERLAQE  | 21360 |
| P35247 | CGEKRLVCEFE  | 21406 | Q15431 | KKLKEAEKLFV  | 21387 | P04554 | CRTRKTRCRH   | 21360 |
| Q13156 | TVDRHFHKSAD  | 21406 | P19532 | SPGGLSSAPSP  | 21387 | Q15651 | QKTESVDNEGE  | 21360 |
| Q92843 | LVTVGAFVASK  | 21405 | P05106 | STFTNITYRGT  | 21386 | P30518 | ASSSLAKDTSS  | 21360 |
| Q9Y5L2 | KGLPDHPSRSM  | 21405 | O00198 | LAAWLLGRRNL  | 21385 | Q9NNW5 | QGQLEVYNWYD  | 21360 |
| P35475 | VPRGPPSPGNP  | 21405 | P10599 | EKLEATINELV  | 21385 | Q12788 | PVTPESSSGRM  | 21359 |
| O60749 | EAFLEPAKAI   | 21405 | O95067 | KDLASPLIGRS  | 21384 | Q92664 | MLSTVAVLTLG  | 21359 |
| Q9Y3A5 | KDVEEGDEKFE  | 21405 | Q00889 | PNTWTFQEILL  | 21384 | P35590 | YAGIDATAEEA  | 21359 |
| P32246 | STGEHLSAGF   | 21404 | P06366 | RRKGRRGRRL   | 21383 | Q15006 | DMLETQITQS   | 21359 |
| P07203 | EALLSQGPGSCA | 21404 | P21731 | PQPPEQLGLQA  | 21383 | O60320 | AVFGADVLDQV  | 21358 |
| Q16777 | GAPVYMAAVLE  | 21404 | Q01995 | TGYGRPRQIIS  | 21383 | P50591 | EASFFGAFLVG  | 21357 |
| O15533 | STCKDSKKKAE  | 21404 | Q93074 | PQPSTNIFGRY  | 21383 | P48049 | EPRPLRRESEI  | 21356 |
| Q00534 | PSQNTSELNTA  | 21403 | P47756 | LVEALKRKQKC  | 21382 | Q99456 | SSQVQEIEELM  | 21356 |
| P05231 | LQSSLRALRQM  | 21403 | P55212 | TKKLHFFPKSN  | 21382 | P25789 | KKEKEQKEKDK  | 21356 |
| Q99719 | LQRMKQMQMDQ  | 21403 | P35625 | PKDSHINATDP  | 21382 | P48651 | KSKVTNGVGKK  | 21356 |
| Q9NP85 | LNPKKKDSMPL  | 21403 | Q14154 | LDERSVRLGFG  | 21382 | Q9UBS0 | KSKRGRGRPGR  | 21355 |
| O75469 | LMQELFGITGS  | 21403 | Q99873 | ELSCSTDYRMR  | 21381 | P10619 | MFSRFLNKKPY  | 21355 |
| P21980 | KGFRNVIIGPA  | 21403 | Q92754 | KTLEKMEKHRK  | 21381 | Q15293 | GEDLTKNHDEL  | 21355 |
| O14807 | TGTHKLQCVIL  | 21402 | P01818 | WGQGTKVAVSS  | 21381 | P51809 | GGFTWPSCVKK  | 21355 |

**ID:** ID from Uniprot Database (<http://www.uniprot.org/>) **Sequence:** Listed sequences match the Uniprot ID, but for the array experiments and for the computational predictions, the cysteines were changed to serine. **NA:** not available. **BLU:** biochemical light unit.

Table S1: Binding data from CAL peptide array.

| ID     | Sequence     | BLU   | ID     | Sequence     | BLU   | ID     | Sequence     | BLU   |
|--------|--------------|-------|--------|--------------|-------|--------|--------------|-------|
| P55789 | WRDGWKDGSCD  | 21354 | Q14689 | QLDPYVAYNM   | 21329 | Q13887 | HLALHMKRRHQ  | 21306 |
| Q92481 | KTGDKEEKHRK  | 21354 | P08603 | GKLEYPTCAKR  | 21328 | P29374 | PPQNVLAVERC  | 21306 |
| P40928 | YPGEEDGGNGG  | 21354 | Q06710 | PPTTATAFDHL  | 21328 | O43927 | LPVPVFKRKIP  | 21306 |
| Q04637 | FKWLREVRGGV  | 21353 | P35287 | EPQPQREGCGC  | 21328 | P05452 | QLPYICQFGIV  | 21306 |
| Q16557 | GTGHLPLGNPL  | 21353 | P43308 | RKYDTPKTKKN  | 21328 | P48735 | KSNLDRALGRQ  | 21305 |
| P10827 | CEDLAGNAASP  | 21353 | O95715 | AWNEKRRVYEE  | 21328 | P49848 | QPNSGSPQAP   | 21305 |
| P02749 | WKTDAASDVKPC | 21352 | P42768 | GDEDEDDEWDD  | 21328 | P23258 | PDYISWGTQEQ  | 21305 |
| O15499 | PGVKKSPKGCSC | 21352 | O60543 | RSQAKGRFTCG  | 21327 | O15027 | RIGQRKHLVLN  | 21305 |
| P09488 | VFSKMAVWGNK  | 21352 | P51553 | IRVINGRAVEA  | 21327 | P17033 | EHQRIHTGETP  | 21305 |
| P22492 | EVNVRKATSKK  | 21352 | O75840 | DHLALHMKRHI  | 21327 | P29460 | SWSEWASVPCS  | 21304 |
| P08397 | LDVARQLNDAH  | 21352 | Q13118 | IALPPTPAPTQ  | 21327 | P57052 | KFRKSKKKKRY  | 21304 |
| P49589 | GLKTTKDCQPQW | 21352 | Q13442 | GKRMQSLSLNK  | 21326 | P09526 | KARKKSSCQLL  | 21303 |
| P52655 | IFSKAIGDAEW  | 21352 | Q15181 | DVDKWFHHQKN  | 21326 | O00399 | TMKGSSTPVKN  | 21303 |
| Q14157 | PPYKHFWTAES  | 21352 | P05783 | SETNDTKVLRH  | 21326 | P50613 | EQGGPLPKKLIF | 21301 |
| P13765 | VSRADVLPQSC  | 21351 | P56705 | CQRLVELHTCR  | 21326 | P35900 | SSEVKEVEENI  | 21301 |
| P50991 | ILKIDVVENR   | 21351 | O00555 | EPYSEDDDDWC  | 21325 | P06454 | DTKKQKTDEDD  | 21301 |
| P16471 | LDPACFTHSFH  | 21350 | P01571 | TNLQKILRRKD  | 21325 | Q06732 | YECGKSFCEMNS | 21301 |
| Q15561 | AQHIIYRLVKE  | 21350 | P14373 | GNHGSHMETSP  | 21325 | Q15842 | TPEGNQNTSES  | 21300 |
| O60507 | LKEKPQTEQVE  | 21350 | P07437 | EDFGEEAEAAA  | 21325 | P10636 | EVASLAKQGL   | 21299 |
| P22460 | LCLDTSRETDL  | 21349 | P19484 | DEGPPGYPDNR  | 21325 | Q14588 | NIRELSEGGSS  | 21299 |
| P24593 | QCHTFDSSNVE  | 21349 | P17027 | QHQSVMHSEGKS | 21325 | Q03933 | PLSDMPLLDS   | 21298 |
| P31144 | YLGQHVHLGGR  | 21349 | P51686 | LLETTSGLSL   | 21324 | P18065 | EARGVHTQRMQ  | 21298 |
| Q9UBK9 | GLQNFPEKPHH  | 21349 | P25786 | PAEKADEPMEH  | 21324 | Q15544 | PSNKHKKIIF   | 21298 |
| P52744 | YKCEECGKAFN  | 21349 | P07029 | PKCFITFNQEEP | 21324 | P03986 | RTAFCCNGEKS  | 21298 |
| P08247 | QGAPTSFSNQM  | 21348 | P16035 | PKQEFLLDIEDP | 21324 | P35236 | YAGQLPEEPS   | 21297 |
| P36402 | SLSMSSSSSPA  | 21348 | P52737 | GPPYKCMWESL  | 21324 | P22670 | RGLFVQALPSS  | 21297 |
| Q14186 | DDDFNENDEDD  | 21348 | Q15269 | GGRDSEEEMLA  | 21323 | P46778 | LLEPIPYEFMA  | 21297 |
| P01374 | PSTVFFGAFAL  | 21348 | P23131 | PRIASNAGSIA  | 21323 | P09629 | DRAEAEIEEEE  | 21296 |
| Q13569 | GTQECEEESHA  | 21347 | Q13107 | GDEEACSMMDTN | 21323 | P13489 | EKDKPSLRVIS  | 21296 |
| P10828 | PPPLFLEVFED  | 21347 | Q06481 | PTYKYLEQMQI  | 21321 | O43819 | RHMAAFRSVLS  | 21296 |
| Q9Y5K8 | AEEKDEDLFE   | 21347 | O43194 | AAENGFEQHEV  | 21321 | P49221 | INAQKIVLITK  | 21296 |
| Q92889 | AEVVSKGKGKK  | 21347 | Q92522 | PSVVPKVPKGRK | 21321 | Q9UK11 | DIILSLFLNDT  | 21296 |
| Q99676 | LNKHQRLHPGI  | 21347 | P98176 | TTISQVAPGED  | 21321 | P28749 | LQDVVSEERANH | 21295 |
| P17482 | MKKMNKEQGKE  | 21346 | O76061 | DEQSEYSDIRH  | 21321 | P51531 | EQSEGSGTDDE  | 21295 |
| O14901 | GSPLVMPASA   | 21346 | O95544 | FEIEEEEEEEEG | 21321 | P49590 | VAEIQKRLSES  | 21295 |
| P38936 | KRRLIFSRRKP  | 21345 | Q9Y6M4 | RRKRKTIQRHK  | 21320 | P00749 | SHTKEENGLAL  | 21295 |
| P01834 | PVTKSFNRGEC  | 21345 | P14868 | MFRDPKRLTP   | 21320 | Q14206 | RRPGLPPSVSN  | 21295 |
| P11473 | LVLEVFNGNIS  | 21344 | P15923 | LSEAHNPAGHM  | 21320 | Q06124 | VGLMQQKKSFR  | 21294 |
| Q9Y3B4 | EKYGINLTDPK  | 21344 | P10075 | LIQHQRVHYRE  | 21319 | Q9Y3F1 | NQYFELAKFLA  | 21294 |
| P52738 | FNHSLTDEHQ   | 21344 | P49642 | LLKKSLLQKDF  | 21319 | Q12815 | PVGSAAPOGSP  | 21294 |
| P30991 | TESESSSFHSS  | 21343 | P01118 | KKKSKTKCVIM  | 21319 | Q13838 | IDISSYIEQTR  | 21293 |
| Q13308 | ALGDSVDSKPP  | 21343 | P25120 | RGTKTVQEKEN  | 21319 | P04843 | VTKIDHILDAL  | 21293 |
| P10114 | DDPCCSACNIQ  | 21343 | Q00994 | HDHHDFFCLMP  | 21318 | P35548 | TPVGYGMYHLS  | 21292 |
| Q14257 | LHDDYFYHDEL  | 21343 | O75570 | ELLDEHLKSAK  | 21318 | P31269 | KKINKDRAKDE  | 21292 |
| O14981 | YSLENFMHSLK  | 21343 | P02778 | AVSKEMSKRSP  | 21318 | P07949 | SAAKLMDTFDS  | 21292 |
| P25874 | SKSRQTMDCAT  | 21343 | Q92917 | CTKEANITTPR  | 21318 | P37837 | TERMFNAENGK  | 21292 |
| P43403 | GSTQKAEACAA  | 21343 | P55089 | QNRIFDSVGGK  | 21318 | Q16864 | ARGMFTAEDLR  | 21292 |
| P13762 | HSGLPTGTLGS  | 21342 | P08118 | KKTCVSEWII   | 21317 | P01769 | WGEGTLVTSIS  | 21291 |
| P25106 | TEYSALEQNAK  | 21342 | P48378 | RSDPNHSLQGI  | 21317 | O43657 | RAITNNQYEV   | 21291 |
| O75069 | MTQCLQEEERY  | 21342 | P49798 | ADCASLVPQCA  | 21317 | Q9Y6Q3 | VKTHSEDKSHE  | 21291 |
| P05019 | RNAECRGKKKG  | 21341 | O76039 | TYHENAALTGK  | 21317 | P54255 | QEDGKSHRQRS  | 21290 |
| Q16514 | RMALIRKTTTK  | 21341 | O75083 | DASVKEWTITY  | 21317 | P35858 | RDLSEAHFAPC  | 21289 |
| P55072 | YTEDNDDDLYG  | 21341 | P00751 | EKLQDEDLGFL  | 21316 | Q14493 | TEPLRDFSAFS  | 21289 |
| P21246 | KEGKKQEKMLD  | 21340 | P55010 | NKDDDDIDIDAI | 21316 | P48643 | DDIRKPGESEE  | 21289 |
| P37173 | IPEDGSLNTPK  | 21340 | Q14012 | TELSPTLPHQL  | 21316 | O75562 | PIDDKRWNLKA  | 21288 |
| P35968 | DSGTTLSPPV   | 21340 | P28066 | KEELEEVKIDI  | 21316 | P30511 | SGSGVSLTANKV | 21288 |
| Q14149 | VVEQMSEISST  | 21340 | P98179 | SGGNRYRDNVDN | 21316 | Q14774 | PEPAQCALGCL  | 21288 |
| Q92820 | ISSFQCYQYFD  | 21339 | Q15032 | DFHILERASSQ  | 21316 | Q99594 | AQHVVYKLVKD  | 21288 |
| P05215 | DSYEDDEEGEE  | 21339 | P13716 | TPQLLQWLKEE  | 21315 | Q92539 | PIPEVDLDDLS  | 21288 |
| Q14191 | MDKTKRGTLFS  | 21339 | P13747 | DSAQGSSEHSL  | 21315 | P19367 | VGVRRLTEASS  | 21287 |
| NA     | WGQGTLVITSS  | 21338 | Q9Y580 | SRDGKWRSSRH  | 21315 | Q04756 | IRPPRRVLAPS  | 21286 |
| O43399 | GDKPLSDPAPE  | 21338 | P14118 | KTLSEKEETKK  | 21315 | Q12923 | EEQKQFPQLLK  | 21286 |
| Q13162 | AGKLKYFDKLN  | 21338 | Q9Y490 | KFLPSLRLDEH  | 21315 | Q9Y4P3 | ETLKSGLALKK  | 21286 |
| Q06643 | GKTFFGAVMVG  | 21338 | P04275 | ECKCSPRKCSK  | 21315 | Q15562 | KVETERAQLED  | 21286 |
| P17947 | CGLAERRHPPH  | 21337 | P19544 | QRNMTKLQLAL  | 21315 | O43548 | GYRNVYVDFAL  | 21286 |
| Q9NSD9 | SLEINIGPFL   | 21337 | P09565 | LAGVVPGLPV   | 21314 | P17035 | CHRRSHIDEKP  | 21286 |
| P26640 | DEAIALFQKML  | 21337 | O43251 | ATADLPPTTEVT | 21314 | Q9NZL3 | LHQNVHVGEKP  | 21285 |
| O14773 | FPALLKTLNLP  | 21337 | P02403 | KRAAVAASSSS  | 21314 | P05107 | TTVMNPKFAES  | 21284 |
| P03992 | IRQRSQKGLLH  | 21336 | P35367 | KTFKRLHIRS   | 21313 | P22102 | ENGKICVWKEE  | 21284 |
| O75360 | PLSLEPSKSWN  | 21336 | P01764 | AEDTAVYYCAK  | 21313 | P29083 | MGQRMFEDLFE  | 21284 |
| Q00887 | PCHGDLTESQS  | 21336 | P19012 | GQVVSCHKREI  | 21313 | P01266 | LQEPGSKTYSK  | 21284 |
| P57082 | GMGTVENWTDG  | 21336 | P41250 | QETGKKETIEE  | 21312 | P25311 | AQPLVPWEAS   | 21283 |
| P11686 | TLCGEVPLYIY  | 21335 | P11684 | MEKIAQSSLCN  | 21312 | O95239 | SGCSPIEEEAH  | 21282 |
| O14957 | PYINGKFKKDN  | 21334 | P49751 | LQSMPPCEPPE  | 21312 | P05543 | FLGKVVNPTEA  | 21282 |
| Q92901 | EKETPETSDDL  | 21333 | P10074 | ITAAVPEDCDT  | 21311 | O15273 | SRMSQEAQRG   | 21281 |
| P19388 | AGRYITYRLVQ  | 21333 | O00219 | PEQYSLAFAEV  | 21310 | Q15054 | QVSITGFFQQRK | 21281 |
| Q9Y5M1 | ENLVATVWDG   | 21332 | O14921 | LLKTMQSNNSF  | 21310 | P08887 | DISNTDYFFPR  | 21279 |
| P30038 | PLGDWSYAYMQ  | 21332 | O95988 | LVLTYQPERKD  | 21310 | P49841 | NAASASASNST  | 21279 |
| P42680 | ELVECEETFRG  | 21332 | P34913 | DARNPPVVSVM  | 21309 | P17931 | IDLTSASYTMI  | 21279 |
| Q9NYT6 | RESTQEKSTFK  | 21332 | P18621 | KLKKQKLMARE  | 21309 | O15539 | VRSEFYQELIK  | 21279 |
| P04553 | RPRYRPRCRRH  | 21331 | P35273 | HRASHYQAHYT  | 21309 | P43351 | QDMKKRKYDPS  | 21278 |
| Q15569 | TPSLQLPGARS  | 21331 | Q03167 | QSTPCSSTSSA  | 21308 | P49796 | LINQKKMSPL   | 21278 |
| Q15004 | LQPDHTLDEKE  | 21330 | P20962 | KRQKTENGASA  | 21308 | O95707 | KFKKAGGTIDL  | 21278 |
| P06127 | SDYDLHGAQRL  | 21329 | P51786 | SWRCTMKKASH  | 21308 | Q15051 | ENLFIGGTKPP  | 21278 |
| Q03164 | CGAKKCKRFLN  | 21329 | Q01484 | SDTEQSEDNNE  | 21307 | O43493 | HQWIVLVSFQL  | 21277 |
| P54577 | WRSTQMQTACM  | 21329 | Q15046 | TLESTTVGSSV  | 21307 | Q14687 | WPRGYLKGYP   | 21277 |
| P24821 | FRNLGRRKRA   | 21329 | Q15049 | SLAPSMETHNP  | 21307 | Q15669 | RLFSINEKIF   | 21276 |
| O00258 | KVVAIVLHPFS  | 21329 | O15226 | GHYELVMPQAN  | 21306 | P51991 | GGSGGYGSRFF  | 21276 |

**ID:** ID from Uniprot Database (<http://www.uniprot.org/>) **Sequence:** Listed sequences match the Uniprot ID, but for the array experiments and for the computational predictions, the cysteines were changed to serine. **NA:** not available. **BLU:** biochemical light unit.

Table S1: Binding data from CAL peptide array.

| ID     | Sequence     | BLU   | ID     | Sequence     | BLU   | ID     | Sequence     | BLU   |
|--------|--------------|-------|--------|--------------|-------|--------|--------------|-------|
| P13196 | SGLSKLVSQA   | 21275 | P20702 | GTQTPSPFSEK  | 21251 | P29316 | ALDVANKIGH   | 21213 |
| Q9UNH7 | QNCLAVLNGDT  | 21275 | P17028 | NAEKLLNVVKV  | 21251 | Q15053 | NQQGPHTPSIP  | 21213 |
| Q9Y5X1 | LRQALSRFPVM  | 21275 | Q15833 | LDKKLEDIALP  | 21250 | Q92622 | LALAAVLEAT   | 21213 |
| Q01658 | SSQDEEDDDDI  | 21275 | P13987 | PFLAAAWSLHP  | 21249 | O75916 | EKEVICPWESL  | 21212 |
| P37840 | EEGYQDYFEPA  | 21274 | P29074 | FVKPLTSTSTNK | 21249 | P20226 | YPILKGFRCFT  | 21212 |
| Q9NY65 | SFEENEGEEF   | 21274 | Q08999 | LQDVANDRGSH  | 21249 | O95522 | LLNACCCGGFI  | 21212 |
| P52742 | SLTKHQRTHGT  | 21274 | Q99593 | VGMVPEWSDNS  | 21249 | P00797 | RNNRIGFALAR  | 21211 |
| O60563 | EPPLPLPLPK   | 21273 | P20061 | GENLEVRWSKY  | 21249 | P15814 | VEKTVAPECS   | 21210 |
| P30519 | LAAGLLAWYYM  | 21273 | Q92819 | KGQQYDMVLDV  | 21248 | P00568 | SQVCTHLDALK  | 21210 |
| P48549 | KLRKMNSDRFT  | 21273 | O43474 | DHLALHMKRHF  | 21248 | P41220 | KPQITTEPHAT  | 21209 |
| P07333 | PLLQPNNYQFC  | 21273 | P78332 | RVMFARYKELD  | 21248 | Q15436 | HLKKLAVSSAA  | 21209 |
| Q9UNH6 | LHLEEASEDKP  | 21273 | P32969 | SEKGTVQQADE  | 21248 | Q03519 | QEGKLQKLAQL  | 21209 |
| P47897 | TVTTLKEDPGKV | 21273 | Q16534 | LAKYEAHGPL   | 21247 | P49757 | SDLQKTFEIEL  | 21209 |
| Q13428 | KKKKKTAEQTV  | 21273 | P17987 | EDAVHSGALND  | 21247 | P04233 | VTQQLDGPVPM  | 21208 |
| O15393 | DWIYRQMKANG  | 21273 | P17030 | VHQRMHGTGEKP | 21247 | Q14541 | SHQHLKQKQL   | 21208 |
| P24864 | GKKQSGPEMA   | 21272 | P09001 | CQPGAPSITFA  | 21246 | P26012 | LNAHETFRCNF  | 21208 |
| Q92598 | NEKNSVNDMLD  | 21272 | Q15776 | HSGEKSESISV  | 21246 | P35241 | TKQRIDEFEAM  | 21208 |
| P07305 | KSSAKRAGKKK  | 21272 | P00737 | QDWVQKTIEN   | 21245 | Q9Y473 | CSYSVKGFQTKQ | 21208 |
| Q13610 | GSRSSDTPMES  | 21272 | Q16143 | QEEYQHEYPEA  | 21245 | Q13319 | GTKHWTMNLDR  | 21207 |
| O75347 | RLVLDSVKLEA  | 21272 | P13682 | LMRHRHRLHVE  | 21244 | P13646 | SGRRTSDVRRP  | 21207 |
| P12270 | GRGGINRGNN   | 21272 | P01767 | FGKGTTVTVSS  | 21243 | P27635 | GPLDKWRALHS  | 21207 |
| P52743 | ALHAHQKIHF   | 21272 | Q09028 | EGSVDPEQGGS  | 21243 | Q9UKW4 | WFPSTVVEEDE  | 21207 |
| P51617 | QGPESDEFQS   | 21271 | P24928 | AISPDDSDEN   | 21243 | P01589 | QRRQRKSRRTI  | 21206 |
| P01166 | KNFFWKTFSTC  | 21271 | P46199 | IQAKTSWDPGF  | 21242 | P52199 | RKDKAKSCTVM  | 21205 |
| Q13907 | QFVDHEKIYRM  | 21270 | P55073 | EQLHGARPRLV  | 21242 | P17257 | SGYLLGKVGNT  | 21205 |
| P57729 | KVASCSGCAKS  | 21270 | P19827 | AYTDYIVPDIF  | 21242 | O00445 | PPDRVRLLPAP  | 21205 |
| P31025 | RQSETCSPGSD  | 21270 | P17936 | EDVHCYSMSQSK | 21241 | Q9Y2L8 | INTLSVEGSL   | 21205 |
| Q15034 | ALDNYEGPSLA  | 21269 | P06870 | KWIEDTIAENS  | 21241 | Q14116 | RSIMFTVQNE   | 21204 |
| Q16600 | SHQRVHKDKPR  | 21269 | P10153 | PVVPVHLDRII  | 21240 | Q13237 | PDELSGWKDF   | 21204 |
| P17037 | QHQRVHTGKKP  | 21269 | P00746 | SYAAWIDSVLA  | 21239 | O00139 | KQINPKRPRAL  | 21204 |
| Q13546 | LLSLIYVSQN   | 21268 | P08631 | TATESQYQQQP  | 21239 | P30408 | FCSSHQQQYDC  | 21204 |
| P04004 | YWLGCAPAGHL  | 21268 | Q9UBN7 | NKFGEDMPHPH  | 21239 | O76090 | WALENRDEAHS  | 21204 |
| Q9Y6F9 | RGRHQESVQLE  | 21268 | P46940 | IFLLNKKFYGK  | 21239 | Q9Y3D7 | EDREKWQMPHT  | 21204 |
| Q14153 | GELDIHQIEKN  | 21268 | Q01664 | REEPSGDGELP  | 21239 | O00165 | DLFLGRWFRSR  | 21203 |
| Q13263 | QELSGGPGDGP  | 21267 | P20340 | EQPVSEGGCSC  | 21238 | Q01581 | PEAAVISNGEH  | 21203 |
| P51522 | FHAGKKNTCN   | 21267 | Q9Y651 | DPYPAAYAAAL  | 21238 | P51153 | DKKNTNKCSSLG | 21203 |
| Q16667 | SRDSQSRVSVR  | 21266 | Q99816 | ARKTAGLSLDLY | 21238 | P98171 | PQGLDTPKPH   | 21202 |
| P25021 | EVTAPQGATDR  | 21266 | Q12901 | DILLSLFLNDT  | 21238 | Q92543 | PGNSKRMGVSS  | 21202 |
| Q9Y3A6 | SLFEDKRKSR   | 21266 | P35269 | INDKMHFSLKE  | 21237 | O43830 | NKCGKTYSHKS  | 21202 |
| Q9UL36 | AGEWQALTHVF  | 21266 | P13164 | MLQIQEKGKY   | 21236 | Q01201 | GGLSPGPEAT   | 21201 |
| Q15078 | DKKRLLLGLDR  | 21265 | P49895 | EVRAVLEKLHS  | 21236 | P21549 | AALQHCPPKKKL | 21201 |
| P38919 | DEMPNMKVADLI | 21265 | Q15545 | LQEELESLLK   | 21236 | Q9Y5X0 | GCKVNTAPQES  | 21200 |
| P01116 | GCVKIKKCIIM  | 21265 | P04196 | VSMFFTHTFPK  | 21234 | P07686 | LYAGYCNHENM  | 21199 |
| Q13671 | PEAEGSRAAEE  | 21265 | Q16760 | ELSRSAPEAVEA | 21234 | P52848 | TWLRDLQNTNR  | 21199 |
| Q9UKI3 | YYCSVGYGFSP  | 21265 | O94806 | APNPDDMEEDP  | 21234 | Q9Y581 | EKRSSLVTKIY  | 21199 |
| P31267 | SGEDSEAKAGE  | 21264 | P49802 | SKRLTSLAQSY  | 21234 | P52815 | LEAVGGTVVLE  | 21199 |
| O95754 | APLATCDETSI  | 21264 | O75324 | LMTPNGPEVHG  | 21234 | Q08945 | SSEDSASGSDE  | 21199 |
| Q9UK13 | TSVSLCGRKAI  | 21264 | P17483 | PGRPNGGPRAL  | 21233 | P30520 | GKSRESMIQLF  | 21198 |
| P20823 | FISTQMSSSQ   | 21263 | P51159 | SEEKEKGCACGC | 21232 | P34096 | GNPQVPVHFDG  | 21198 |
| P54829 | YEKQLSHQSPE  | 21263 | P01583 | ITDFQILENQA  | 21231 | P15622 | ECGTPSVHAGL  | 21197 |
| P06749 | RGKKKSGCLVL  | 21263 | Q92730 | KKEKAKSCSIM  | 21231 | P51798 | RGLEELSLAQT  | 21196 |
| Q00403 | FDTPVDKLPQL  | 21263 | O00212 | RRTQGFQCVVT  | 21230 | P52741 | RRQKVHTAGRL  | 21196 |
| P36508 | TLETTVSESGC  | 21263 | Q99962 | NYVEILVALPH  | 21230 | P04687 | EGEGEEEGEEY  | 21195 |
| P17706 | GWRLLFFQNAL  | 21262 | Q92526 | MIEFKINPSRR  | 21230 | Q16836 | KKTGEGFYKYK  | 21194 |
| O94762 | DALVTCEELG   | 21262 | Q03403 | FFPKSVEDCHY  | 21229 | P09067 | SLATAGSAFQP  | 21194 |
| O43593 | KVAVGTQLQEK  | 21261 | P49767 | VPSYWKRPQMS  | 21229 | P29084 | LKDYSDITSSK  | 21194 |
| P54868 | QHRRKYARRPV  | 21261 | Q14693 | FENQDIHSASA  | 21229 | P49750 | SMFKTFGKDSG  | 21194 |
| Q92782 | KEKASAYITLT  | 21261 | Q12962 | GINVKKPHYFT  | 21228 | O14978 | RLMSHQRTHTG  | 21194 |
| P01911 | RARSEASQSKM  | 21260 | P50750 | TNTQTEFERVF  | 21227 | Q9Y5A6 | QRVHTGEGEAP  | 21193 |
| O43665 | AAKRASRIYNT  | 21259 | P01233 | PGPSDTPILPQ  | 21227 | P09326 | TVPTILGILLT  | 21192 |
| Q06633 | VGATDLPGQEW  | 21259 | O75578 | EEEEKREKLEQ  | 21227 | P78426 | LLHASEPESSS  | 21192 |
| P07476 | KQEVGWPPKHK  | 21258 | P49810 | MDTLASHQLYI  | 21227 | P17964 | DEGCCSACVIL  | 21192 |
| P37802 | MTGYGMPRQL   | 21258 | Q92540 | QRGQGTMPNPPH | 21227 | P17600 | LRKSFAFLSD   | 21192 |
| Q15697 | LHQHRLHRLHGD | 21258 | O43182 | FSSSLPYLMFL  | 21225 | P78371 | PRKRVDPDHPC  | 21192 |
| Q02224 | SGKDVPECKTQ  | 21257 | P49765 | PDTCRCKRLRR  | 21225 | Q9Y3E2 | LGGNKKTGTP   | 21192 |
| Q9ULV5 | SYLGPEASPSQ  | 21257 | P01562 | TNLQERLRRKE  | 21224 | O94761 | LATEELLQVAR  | 21191 |
| P13693 | FFKDLGLEMEKC | 21257 | Q15770 | KPTMQSSRRCC  | 21224 | P13683 | VTTELNIREST  | 21190 |
| Q16465 | SLPLPLGSHGA  | 21257 | P23677 | LIGILASLAER  | 21223 | NA     | WGQGTTLVTSS  | 21190 |
| P56524 | DEEPMEEFPL   | 21256 | P01824 | WGQGTTVVHVSS | 21222 | Q99665 | QLKMRCDSLML  | 21190 |
| P48382 | QEHKDPKATPP  | 21256 | P05362 | PMKPNTQATPP  | 21222 | Q13547 | AKGVKEEVKLA  | 21189 |
| P49758 | LYSNTPLAKRP  | 21255 | P15884 | MGDASNMGQM   | 21222 | P10072 | NLIRHQRTHSG  | 21189 |
| Q13509 | DEEESQAQGP   | 21255 | P54725 | NFLLSQNFDD   | 21222 | Q9Y6H5 | SSASKGKNKAA  | 21189 |
| P02788 | PLLEACEFLRM  | 21255 | Q08116 | LLNDLQANSLK  | 21221 | P49368 | RQGGAPDAGQE  | 21189 |
| Q93038 | EDLRSRLQRGP  | 21255 | Q15542 | LVLAAGAYSPQ  | 21221 | P23435 | STFSGFLVFPL  | 21188 |
| P19397 | QIDKTSQTIGL  | 21254 | P14652 | STLCAIDLQFP  | 21220 | P17858 | TRRTLSMDKGF  | 21188 |
| Q07654 | FKPLQEAECTF  | 21254 | P17082 | DKKKKGCHCIV  | 21219 | O14782 | SLRPATVADHE  | 21188 |
| P51157 | NPPRSSMCAVQ  | 21254 | P56192 | PPEAPKGKKKK  | 21219 | Q00577 | LLQEEEEGEED  | 21188 |
| O00287 | QRQFPFGTSM   | 21254 | Q10587 | VSKYETKYGPL  | 21219 | P13984 | YRHYQGEKSD   | 21188 |
| P04844 | LAQAVKRTAH   | 21254 | P46939 | CPNVPSRPQAM  | 21219 | Q92785 | KASIYQNNQNS  | 21187 |
| P20062 | GETIELRLVSW  | 21254 | Q14147 | TATEAETTRTR  | 21218 | Q13643 | VLCQGCQAGP   | 21187 |
| O15164 | LKSIERQLLK   | 21254 | Q13651 | LPLISSQSSE   | 21217 | P17032 | INVVNEGNYSG  | 21187 |
| O75144 | ALVCPSPVPGAT | 21254 | O14817 | CQVVKADTYCA  | 21217 | P35680 | SSSKQCPLQAW  | 21186 |
| Q9UIY3 | LFGIESKSSDS  | 21254 | Q13702 | CRSSMKPGFV   | 21216 | P78411 | PYELKKGMSDI  | 21186 |
| P00492 | ISGTGKAKYKA  | 21253 | O15258 | KGEDAGKAFAS  | 21216 | P51610 | SAPKKSADGQ   | 21185 |
| Q15543 | RKAFDEANYGS  | 21253 | Q06587 | ELCYAPTKDPK  | 21216 | P78413 | LPKAGGKPFCA  | 21185 |
| Q13360 | KRIHNGQKLHE  | 21253 | O96004 | PQQVWALELNQ  | 21215 | Q99708 | IFSPKGKEQKT  | 21185 |
| P40189 | QTVRQGGYMPQ  | 21252 | P54727 | NFLQKQNFDED  | 21215 | Q00839 | PWSQHYHQGY   | 21185 |
| Q16594 | DDDDDDDDYDNL | 21252 | Q9P2Y4 | PGEAGLGGQER  | 21215 | O00194 | GEKPPEKKCIC  | 21184 |

ID: ID from Uniprot Database (<http://www.uniprot.org/>) Sequence: Listed sequences match the Uniprot ID, but for the array experiments and for the computational predictions, the cysteines were changed to serine. NA: not available. BLU: biochemical light unit.

Table S1: Binding data from CAL peptide array.

| ID     | Sequence      | BLU   | ID     | Sequence      | BLU   | ID     | Sequence     | BLU   |
|--------|---------------|-------|--------|---------------|-------|--------|--------------|-------|
| P46783 | GFGRRGRGQPPQ  | 21184 | Q92781 | WVLPKPAQAVY   | 21146 | P18827 | QKPTRKQEEFYA | 21105 |
| Q07960 | ELFSPDPSPGL   | 21183 | Q9UGU5 | LDNIAIMPGL    | 21145 | Q9Y5J8 | MKRVMQSSGPA  | 21104 |
| O75190 | GKEQLLLLDNK   | 21182 | Q02877 | YKEETIEKMQE   | 21145 | O43670 | RPPVMSQGGRY  | 21104 |
| P20339 | TQPTRNQCCSN   | 21182 | P42677 | TEGCSFRRKQH   | 21145 | Q05084 | KTDKEHELLNA  | 21103 |
| O60895 | VWRSKDSEAAQ   | 21182 | P31321 | QRYNSFISLTV   | 21144 | P29622 | FLGKVVDPSTKP | 21103 |
| P49241 | DGYEPPVQESV   | 21182 | Q06609 | INADGVGDAKD   | 21144 | Q16566 | VPQQDVILPEY  | 21103 |
| P37243 | LPPLFLEVFE    | 21182 | P29459 | IDRVTSYLNAS   | 21143 | P15621 | ERTHTGEKPYE  | 21103 |
| P35789 | RHEIHTGEKP    | 21182 | P10644 | QQYNSFVLSV    | 21143 | O15550 | TLAPPLPSASS  | 21101 |
| P08729 | TASASRRSARD   | 21181 | P05129 | SPTSPVPVPM    | 21143 | NA     | FGQGTRLQIKR  | 21100 |
| Q92692 | KGFVMSRAMYV   | 21181 | P11801 | VDPGARM TALQ  | 21143 | P50120 | DQVCRQVFKKK  | 21100 |
| O60809 | RIFFGPVP PCPN | 21181 | P05217 | EFEEEEEEVA    | 21143 | P51790 | ANQDPASIMFN  | 21099 |
| P17040 | NHQRTHTGEKP   | 21181 | P06865 | VGFCEQEFEQT   | 21142 | Q99832 | AGRGRGRGRPH  | 21099 |
| P49406 | IWKEIEASKRS   | 21180 | Q92764 | PICVPCPGGRF   | 21142 | P49207 | LKAQAQSQKAK  | 21098 |
| P32754 | NMETNGVVPGM   | 21179 | P48775 | DSSYFSSDESD   | 21142 | P52740 | CNLAQHKKIHT  | 21098 |
| P04645 | IRSMPEQTGEK   | 21179 | P00450 | TVLQNEDETKSG  | 21141 | P25398 | DVIEEYFKCKK  | 21097 |
| P14866 | KLCFSTAQHAS   | 21179 | P48547 | AGRKPLRMSI    | 21141 | O14593 | FQSNLVPADPE  | 21096 |
| P08779 | SSSSFSQGGSS   | 21178 | Q13557 | FSGGTS LWQNI  | 21141 | P50479 | AVYPNAKVELV  | 21096 |
| Q9Y496 | KPETFVDSLQ    | 21177 | Q04864 | SDFSFPYEFFQV  | 21141 | Q9UPN9 | LKSDERPVIHK  | 21096 |
| Q92930 | HASSDVERMIL   | 21177 | Q04695 | SSREQVHQTTT   | 21140 | Q14146 | AKHEGEKRYTA  | 21096 |
| O96020 | PKSTEKPPGKH   | 21175 | Q9Y3U8 | AAMRKA AAKKD  | 21140 | P42575 | HLYLFP GHPPT | 21095 |
| Q01344 | PGVETLEDSVF   | 21175 | P50990 | GKKDWDDQND    | 21140 | O60894 | VWQSKRTEGIV  | 21095 |
| O43345 | KKI HAGEKLYK  | 21175 | P02753 | YCDGRSERNLL   | 21139 | Q9Y5W7 | QKEVTSVT SWM | 21095 |
| Q01813 | GQLEHVQWVSW   | 21174 | P81605 | AAQGENAGEDP   | 21139 | Q03518 | AMVQAPADAPE  | 21095 |
| P22557 | NMGFPQYVTTYA  | 21173 | P26639 | EFRSKQAE EEF  | 21139 | Q9Y2P7 | NLLKHQNVHKG  | 21094 |
| P30654 | GSSSFSGQQCS   | 21172 | Q14202 | ELGRPG EEDLD  | 21139 | Q13516 | GSLPRLTSDAK  | 21094 |
| Q9UDV7 | PRQLPPPPERD   | 21172 | Q9Y624 | GEFKQTS SFLV  | 21138 | P42771 | DAAEGPSDIPD  | 21093 |
| P14653 | SPEASPSVSTS   | 21171 | P01603 | FGQGTKVDLKR   | 21138 | Q92813 | RHWLEKNFSKR  | 21093 |
| P04090 | GCTKRSLARFC   | 21171 | P98168 | LITV TGS SFLV | 21138 | P22750 | AQAVAPQPCGC  | 21093 |
| Q92784 | YIWMKEKRHRGP  | 21171 | P36980 | GKLVYPSCEEK   | 21137 | P38570 | LKSEN LLEEN  | 21092 |
| Q14585 | GKKLCELETIN   | 21171 | P26447 | EGFPDKQPRKK   | 21137 | Q9Y337 | KWIQETIQANS  | 21092 |
| P17658 | AYA EKRMLTEV  | 21170 | P40198 | CRMDHKA EVAS  | 21136 | Q92545 | PWSNSHFPHEN  | 21092 |
| P51797 | QARLRQHYQTI   | 21170 | P14678 | PPPPGMRPPRP   | 21136 | Q9UMY4 | DRNYVPGKVRQ  | 21092 |
| P42701 | LEDGDRCKAKM   | 21170 | Q30201 | AMGHYVLAERE   | 21134 | P35713 | SAVYYSACISG  | 21092 |
| O43167 | PQPTPLCQEQS   | 21170 | Q9UKX5 | PGLDPTPKVLE   | 21134 | P01584 | ITDFTMQFVSS  | 21091 |
| P05156 | VGRPFISQYNN   | 21169 | Q92804 | DYRNDQRNRPY   | 21134 | P24723 | NFSYVSP ELQP | 21091 |
| P57737 | SFEGVDEDEWD   | 21169 | P46781 | GAGAGDDEEED   | 21134 | P30622 | WATNCNDDETF  | 21091 |
| Q15973 | TGEKPYKCKKM   | 21169 | P52736 | AGQPSDSL YSL  | 21134 | P10265 | NQEREGIGYPF  | 21091 |
| P35275 | VINMVKPLHNS   | 21169 | Q14586 | AHQRSHTREKL   | 21134 | NA     | FGEGTRLQIKR  | 21090 |
| P54257 | GLGPSHLD MNY  | 21168 | Q13976 | PDDNSGWDIDF   | 21133 | Q9UJU2 | GTGPRMTAAYI  | 21090 |
| P28068 | GSNYS EGHWHIS | 21168 | O95521 | FIGPTPCPSCG   | 21133 | O15211 | ATGRK IARALF | 21090 |
| P17010 | IMRHHKHEVGLP  | 21168 | P46060 | RHSLQ TLYKYV  | 21132 | P51532 | EDRSGSGSEED  | 21090 |
| Q92833 | IYIYFFVIIIF   | 21167 | P14798 | LTYCFNKPEDK   | 21131 | O95201 | GALATPPPAPT  | 21090 |
| O76095 | LEKVRKQIESI   | 21167 | Q13123 | ADGVEVKRPKY   | 21130 | P05386 | SDDDMGFGLFD  | 21089 |
| P32929 | KA AHPPSGIHS  | 21166 | Q14258 | AGATLSICSPK   | 21130 | P48729 | TDKSKSNMKG   | 21088 |
| P35610 | RPRSWTCRYVF   | 21166 | P17075 | GVEVEVTIADA   | 21129 | P35326 | PCQSKYPPPSK  | 21088 |
| Q99867 | YQDATAEGEGV   | 21165 | Q02985 | REGIVEYPRCE   | 21128 | O14628 | SLHTVHESIHT  | 21088 |
| Q9Y2Q1 | NHSSNLT KHNS  | 21165 | P11597 | HLLVD FLQSL   | 21127 | P48230 | CCGCCGGDGPV  | 21087 |
| Q06730 | GESPDDL NVQ   | 21165 | P20839 | HGLHSY EKRLY  | 21127 | P57730 | DPQLASKMGLH  | 21086 |
| O15379 | HDNDKESDVEI   | 21164 | P35239 | SQQNKSQCCSN   | 21125 | P20338 | TQAPNAQECCG  | 21086 |
| Q14584 | ERRHADERLSA   | 21164 | P43405 | RLRNYY YDVVN  | 21124 | P28751 | RKRRKMRQRSK  | 21086 |
| P17025 | VHQRTHTGEKP   | 21164 | P20810 | TTEETS KPKDD  | 21123 | P52747 | IQQGETPGLDD  | 21085 |
| O75312 | EGYEAGLAPQR   | 21164 | Q9Y6T7 | LVKRTNRNRSKE  | 21123 | Q12894 | SRVRDKRADIL  | 21084 |
| O95300 | PQHVVWALELQ   | 21163 | P26045 | EEGLVQMLDPS   | 21123 | Q16774 | EEIKKAQRTGA  | 21084 |
| Q12999 | KDPRANPSAFL   | 21163 | P12018 | MEPTAARTRVP   | 21122 | P46013 | TTRSHRDSEDI  | 21084 |
| Q9Y3E5 | IDKVTGHLKLY   | 21163 | P51572 | AVDGPMDKKEE   | 21121 | P09661 | EMEEDTVTNGS  | 21084 |
| P17036 | QHQRHTGENP    | 21163 | P52198 | HKDRAKSCNLM   | 21121 | P40227 | IMRAGMSS LKG | 21084 |
| P78406 | AAEELKPRNKK   | 21162 | Q9Y6Z2 | LFQHWEGSIPT   | 21120 | P07288 | KWIKDTIVANP  | 21083 |
| P07998 | VHFDASVEDST   | 21162 | Q9UL58 | KHQKLHTRDKS   | 21120 | Q05655 | VNPKFEHLLD   | 21083 |
| P05114 | DEAGEKEAKSD   | 21161 | Q15928 | SHLNKHKKIHT   | 21118 | P30050 | INSGAVECPAS  | 21082 |
| O95602 | TGLFELKQPLR   | 21161 | P52746 | APAAPHTGPEG   | 21118 | O15127 | SSAAQGA FQGN | 21082 |
| P51597 | QLKLFEEENMNF  | 21161 | P09455 | VVCKQVFKKVQ   | 21117 | P50053 | KCGLQGF DGIV | 21081 |
| P49756 | ETEAKKIGLVK   | 21160 | P31350 | TENSFTLDADF   | 21117 | P52434 | RVYLLMKK LAF | 21081 |
| O15067 | NARNWTEGSC    | 21159 | P15692 | ERTCRCDKPRR   | 21116 | O95409 | GLSSNFNEWYV  | 21081 |
| P39019 | AGQVAAANKKH   | 21159 | P35274 | ECNQCGKAF AQ  | 21116 | Q16880 | NGHIKHEKKVK  | 21080 |
| P46777 | FLRAQERAAES   | 21158 | P47804 | SPQKREKDRTK   | 21115 | O15066 | LYPQSRGLVPK  | 21080 |
| Q13106 | SLIKHQRHSR    | 21158 | O43566 | HGSA LHALSVP  | 21115 | O15492 | SSCSLDEPSHT  | 21080 |
| Q9UQL6 | AEEPMEQFALP   | 21157 | Q92766 | ADGASQHV GME  | 21115 | P51508 | SVLSMHRNIHT  | 21080 |
| P09601 | VATVAVGLYAM   | 21157 | Q9UNY5 | RRVHARKEPSH   | 21115 | Q15942 | CRKCHTARAQT  | 21080 |
| P20151 | KWIKDTIAANP   | 21157 | P51959 | THLPTIPEMVP   | 21114 | P08514 | PPL EEDDEEGE | 21079 |
| P52739 | NEDRTALPVL    | 21157 | Q03426 | DSRVQQA LDGL  | 21113 | P01596 | FGPGTKVDIKR  | 21079 |
| Q13105 | PTAPECPPPAE   | 21157 | P52272 | REIDVRIDRNA   | 21113 | O43531 | LSQNKVGSQNY  | 21079 |
| O15535 | HQKIHTVAELV   | 21157 | P23921 | ENRDECLMCGS   | 21112 | P10276 | SNRSPATHSP   | 21079 |
| Q14721 | GAHGSTRDQSI   | 21156 | P33763 | AYNDFFL EDNK  | 21112 | P10826 | NSGVQSPLVQ   | 21078 |
| P78330 | DFVELLEEL E   | 21156 | O75820 | QHQLHTAWMQ    | 21112 | P17041 | ANLVTHQRIHT  | 21077 |
| Q16384 | EEISDPEEDEE   | 21156 | Q05823 | GGASGLASPGC   | 21111 | Q01628 | VIPVLIFQAYG  | 21076 |
| Q14590 | PFKCEECGKEF   | 21156 | Q9UBX7 | VDWIQETMKN    | 21110 | P07910 | GEDDRDSANGG  | 21076 |
| P49752 | RDKGLVNRGRG   | 21155 | P13631 | GQGKGGLKSPA   | 21109 | P51449 | PGGWSPALWK   | 21076 |
| P54819 | KATCKDLV MFI  | 21154 | P51523 | NHQRTHTVKKS   | 21109 | Q14002 | MIGVLGAMALI  | 21075 |
| P51606 | PAPTPACRGAE   | 21154 | P05388 | SDEDMGFG LFD  | 21108 | Q92973 | LKERLAAFYGV  | 21075 |
| Q13398 | QHQRHSEGEKP   | 21154 | P21579 | EEVDAMLAVKK   | 21108 | P78368 | RRKRKSLQRHK  | 21074 |
| O95125 | RHQRT HSEKTS  | 21153 | Q08334 | LGTTPPGQGPQS  | 21107 | P10113 | KKPKKKSCLLL  | 21074 |
| P51788 | GSPSDSDDKCK   | 21152 | O76013 | SSREHVQSRPL   | 21106 | P10660 | ASTSKSESSQK  | 21074 |
| O76011 | PCGTSTQKGCCN  | 21151 | Q15459 | LALKERGGRKK   | 21106 | P08865 | TEWVGATDWS   | 21074 |
| P05787 | LVSESSDVL PK  | 21151 | O00268 | HL LLYKAFLK   | 21106 | O60225 | EEISDPPEDDE  | 21074 |
| Q9UQR1 | SPDAT TGGTFFG | 21150 | Q15131 | TSEGSKRCKPK   | 21105 | P22090 | DKRLATKQSSG  | 21073 |
| P01765 | WGEGLTVTVSS   | 21149 | Q06033 | VHTDYIVPNLF   | 21105 | Q9UIJ7 | PQRSQKASVTP  | 21072 |
| Q16552 | TCVTPIVHHA    | 21149 | P04808 | GCTKRS LAKYC  | 21105 | Q92753 | LFNPDCA TACK | 21072 |
| P51814 | HSGEKRYKASD   | 21149 | O15514 | DDIQT KRSFQY  | 21105 | Q9UNL2 | GLIAL LSTGSK | 21072 |

ID: ID from Uniprot Database (<http://www.uniprot.org/>) Sequence: Listed sequences match the Uniprot ID, but for the array experiments and for the computational predictions, the cysteines were changed to serine. NA: not available. BLU: biochemical light unit.

Table S1: Binding data from CAL peptide array.

| ID     | Sequence     | BLU   | ID     | Sequence     | BLU   | ID     | Sequence     | BLU   |
|--------|--------------|-------|--------|--------------|-------|--------|--------------|-------|
| Q03721 | WGFPHKHKDVPL | 21070 | P31948 | KLMDVGLIAIR  | 21032 | P20042 | GKRAQLRAKAN  | 20985 |
| P07307 | EKRRNATGEVA  | 21070 | P22614 | HFRPAGLPEKY  | 21032 | O95218 | QKRNNVLKFTS  | 20985 |
| P09651 | SSSSYGSGRRF  | 21070 | Q9UDV6 | ALEPGRPNGLL  | 21032 | P46695 | STFLQHPAAAF  | 20984 |
| P10398 | ACLLSAARLVP  | 21069 | P01607 | FGQGTKLQITR  | 21031 | P05198 | DAEEMEAKAED  | 20984 |
| Q03252 | PRTTSSRGCVYM | 21069 | P18615 | DVYKENLVDFG  | 21031 | P27352 | HEHITANFTQY  | 20984 |
| P17034 | QHQRVHTGERP  | 21069 | Q9Y584 | AFSAADYYLR   | 21030 | Q04759 | FMNPRMERLIS  | 20983 |
| P46063 | MPDMNVTKFSN  | 21068 | P02433 | PNARLRSEENE  | 21030 | P08621 | ENGYLMEAAPE  | 20983 |
| P10155 | DVIRNFTLDMI  | 21068 | P04430 | FGQGTKVQIKR  | 21028 | O60417 | DSFLKAVPSQK  | 20983 |
| P52435 | VAIKDKQEGIE  | 21068 | P08910 | SDTEQVEADLE  | 21027 | P35711 | DSENIHAGQAN  | 20983 |
| Q13554 | HCSGAPVAPLQ  | 21067 | Q9Y2P8 | IGFSNLSKTLK  | 21027 | Q14142 | TTRPASSPSTT  | 20983 |
| P78563 | PTEQDQFSLTP  | 21067 | P25815 | CHKYFEKAGLK  | 21026 | P05112 | IMREKYSKCSS  | 20982 |
| Q92953 | SLQERGASLKL  | 21066 | P42766 | LYPLRKYAVKA  | 21025 | P01601 | TYYCQYQNSYP  | 20982 |
| P12268 | HSLHSYERKLF  | 21066 | P22626 | GSGGYGGRSRY  | 21025 | Q04912 | PRPLSEPPRPT  | 20982 |
| P09683 | GAAAEGTLRPR  | 21066 | P10301 | KKGGGCPVCVLL | 21025 | P25111 | GGDAPAAGEDA  | 20982 |
| P03952 | SDGKAQMGSFA  | 21064 | Q06731 | QRTHIGKEPYE  | 21024 | P17097 | RLTQHQQIHMV  | 20981 |
| P38663 | KVSAPRVGGRK  | 21064 | Q13568 | GPWPMHPAGMQ  | 21023 | P33176 | VAVRGGGGKQV  | 20979 |
| O95416 | DPYSSAHATAM  | 21064 | Q92504 | VIMMVLIHLE   | 21023 | Q9P0G3 | RSWIEETMRDK  | 20979 |
| P09382 | GDFKIKCVAFD  | 21063 | P13598 | AVRRLLPQAFRP | 21022 | O43623 | KHEESGCCVAH  | 20979 |
| Q16666 | SSMETSDFDFF  | 21062 | P47813 | IGDDDEDIDDI  | 21022 | Q9Y2S0 | DQKASRNESTF  | 20978 |
| O15160 | FLDELDAVQMD  | 21062 | P17024 | REHERHTINR   | 21022 | P52433 | SLMDDYLGLVS  | 20978 |
| P09132 | GSKKGGKKKKK  | 21062 | P51687 | AWHRVHVYVSP  | 21021 | O75437 | THTGEKSYKYE  | 20978 |
| P98182 | THSACKTRKQK  | 21062 | Q9UKR0 | VDWIRMIMRNN  | 21020 | Q13591 | YFTDLNNYDEY  | 20977 |
| P05113 | GVMNTEWIES   | 21061 | Q15746 | EGEGESEEEEE  | 21019 | Q9ULJ3 | FSLWSHEQTHN  | 20977 |
| P23396 | PPAMPQPVPTA  | 21061 | P46776 | KSVGGACVLVA  | 21019 | P41584 | DWGVDELITD   | 20976 |
| P17081 | GSRCINCPILT  | 21061 | Q14593 | RHKRNHMGESK  | 21019 | P23297 | VACNNFFWENS  | 20976 |
| Q01826 | GNTDINTDLKD  | 21061 | Q03936 | LSQLTQHKKIH  | 21019 | P49458 | KEARNVTMETE  | 20976 |
| O15231 | IHCCKCYEKL   | 21061 | O95721 | IKSTERKVRQL  | 21018 | O00458 | RDKRADVGEFF  | 20975 |
| Q14005 | QSKETTAAGDS  | 21060 | P17038 | LTPQTFNSIK   | 21018 | P35712 | ARLSKIHLEKY  | 20975 |
| O00629 | SANVPTGFGFQ  | 21060 | P18510 | MVTKFYFQED   | 21016 | Q14641 | CDDGTSVKLCT  | 20974 |
| P10516 | SDSGVQPPASS  | 21059 | Q14624 | GVEISCSWSVL  | 21015 | P14793 | TNNLRPKKKVK  | 20974 |
| P17017 | RHERHTHNAEK  | 21059 | O75897 | TDTRLTFHFQF  | 21015 | P35325 | PCQPKYPPKSK  | 20973 |
| P17020 | QHQQVHTGDKP  | 21059 | P51504 | QSKHSGGKKNL  | 21015 | P26951 | LVTEVQVQKQT  | 20971 |
| Q14003 | LNANAAAWISP  | 21058 | P08526 | KNKWFFQKLR   | 21014 | Q9UIC8 | GNELGLKEITY  | 20971 |
| Q9Y6K8 | QLCTAIDSIF   | 21058 | P56279 | EDMLLELLPDD  | 21013 | P14778 | KLQREAHVPLG  | 20970 |
| P29375 | KLPMEDLKETS  | 21058 | O43896 | APDLKESGAAY  | 21012 | Q9Y5Q6 | GCSMTDLSALC  | 20970 |
| O94810 | ACGPGGGDQVA  | 21058 | P05060 | QKIAEKFSQRG  | 21012 | P01600 | FGQGTREVIKR  | 20969 |
| P23942 | GAGAGQAPQEA  | 21057 | P00540 | VDLTSKALG    | 21011 | P98155 | ISVSTDDDLA   | 20969 |
| P46782 | DELERVAKSNR  | 21057 | Q13243 | RSRSRVSVDGN  | 21011 | P17022 | HHEKIHTGEKP  | 20969 |
| P80098 | HLDKKTQTPKL  | 21057 | P24394 | VSVGPTYMRVS  | 21010 | O00505 | TANLQTEKFN   | 20967 |
| Q9UK12 | DHLSLFLNDI   | 21057 | Q9Y5W9 | DPGQLETVLEK  | 21010 | O75845 | KLFNGEFTKTE  | 20966 |
| Q02156 | GFSYFGDELMP  | 21056 | P80162 | QKILDSGNKKK  | 21009 | Q9UHB9 | GYIKGIFGFRS  | 20966 |
| P12947 | KNLQTVNVNEN  | 21056 | P24278 | TQENVDTILVE  | 21009 | Q00537 | HGKNRRQSMFL  | 20965 |
| Q14192 | DILCPDCGKDI  | 21056 | P23743 | PRSTNFFGFLS  | 21008 | P01602 | TYYCQYQNSYS  | 20964 |
| P09913 | LIPSASSWNGE  | 21055 | P52333 | PEGKHLSLFS   | 21007 | O95475 | SITSSDSECDI  | 20964 |
| P57727 | IHEQMERDLKT  | 21054 | Q9Y259 | KGQLTSVHSSS  | 21007 | Q15306 | HRSIRHSSIQE  | 20963 |
| P39023 | KKDRIAKEEGA  | 21053 | Q92876 | TNWIQKTIQAK  | 21005 | O60333 | LSRRCPSPSKY  | 20963 |
| Q03395 | EAPPKEDLSEA  | 21053 | P01611 | FGGGTTVDIKR  | 21005 | O95650 | PAEKSLSLGTQ  | 20963 |
| P51793 | ANQDPESIMFN  | 21052 | O95235 | LLKSGPFGKKY  | 21005 | P01616 | FGGGTNVEIKR  | 20963 |
| O60481 | GLPPNFNEVYV  | 21052 | P39028 | LYKKKKERPRS  | 21004 | O95751 | DDDDEEEEDDY  | 20963 |
| P49019 | SLEKQLGCCIE  | 21050 | Q9Y3T9 | ELEDLQLSEDD  | 21004 | P36578 | KPTTEEKKPAA  | 20963 |
| Q15437 | HLKKLAVSSAC  | 21050 | P42262 | YNVYGIESVKI  | 21003 | P22362 | KMLRHCPSKRK  | 20963 |
| P34991 | VRKENQWCEEK  | 21050 | P52597 | YSGQNSMGGYD  | 21003 | P01597 | FGPGTKVEMTR  | 20962 |
| Q03923 | KIHTGEKLIQ   | 21050 | O43264 | ERRAAALAKIK  | 21003 | Q99963 | NYVEVIVPLPQ  | 20962 |
| Q00536 | RPAFRVVDTEF  | 21049 | O40984 | RDGDILGKYVD  | 21002 | P41743 | NPLLSMAEECV  | 20961 |
| P52436 | EKLLNYAPLEK  | 21049 | P09896 | DKKRKGQVIQF  | 21002 | P01609 | FGQGTREVENKG | 20961 |
| P17540 | VPPPLPQFGKK  | 21048 | Q16587 | RNFSLSGSKPRN | 21001 | Q05952 | TKTRSSGWKSN  | 20961 |
| P57682 | LALHRKRHMLV  | 21048 | Q99543 | EQVLNASRAKK  | 21001 | P01608 | FGGGTKVDFKR  | 20960 |
| P35397 | SEFEPAMQIDG  | 21048 | O00410 | QAAIQELLNSA  | 21000 | P16632 | ANVGAGKKPKE  | 20959 |
| O43390 | FYQDTYGGQWK  | 21048 | P57071 | VDVLRDHIHVV  | 21000 | P09058 | YLRKIKARKGK  | 20958 |
| Q07002 | GRGKNRRQSIF  | 21047 | P05000 | LRSKDRDLGSS  | 20998 | Q07955 | SPRHSRSRSRT  | 20958 |
| P37108 | TAATTAATAAQ  | 21047 | Q08170 | SRSRSRSHRS   | 20998 | P27144 | KITPIQSKEAY  | 20957 |
| O15503 | AMGVPEKPHSD  | 21046 | P51795 | ANQDPDSILFN  | 20997 | P05162 | GFNMSSFKLKE  | 20957 |
| P51815 | RRREACLVSPN  | 21046 | P17301 | DEIDETTELSS  | 20997 | Q99584 | RKKKDLKIRKK  | 20956 |
| P08700 | AQQTTLSLAIF  | 21045 | O15126 | AAQNAFKGNQI  | 20997 | P10914 | LPSIAIPCAP   | 20955 |
| P23352 | PHHYKPSPERY  | 21045 | P47914 | KRTQAPTKASE  | 20996 | P08648 | AQLKPPATSDA  | 20955 |
| P12277 | QAIDDLMPAQK  | 21045 | P36954 | TAPHCGRHWTE  | 20996 | P09234 | PTRPGMTTRPDR | 20955 |
| P52294 | QCEAPMEGFCN  | 21044 | O00161 | ANARAKKLIDS  | 20996 | P13647 | TTSSSRKSFKS  | 20954 |
| P01308 | CSLYQLENYCN  | 21044 | O75346 | LNVPPLISIR   | 20996 | Q07866 | QQQWPGRRHR   | 20954 |
| P19387 | HEIQSDVLTIN  | 21044 | Q14974 | TKELRKLKNQA  | 20995 | O43615 | DISASSTEQIL  | 20953 |
| Q02546 | YESSTASALVA  | 21044 | Q92985 | ECFLMELEQPA  | 20995 | P11800 | TVKDLISRLQ   | 20953 |
| O00124 | VLILEEKEQTN  | 21043 | P49908 | NQAKKCECPN   | 20995 | Q16637 | QKEGRCSHSLN  | 20953 |
| Q14807 | GLAAGQRCGAS  | 21040 | Q13151 | GGGGGYGSSSF  | 20994 | P35243 | PQKVKEKMKNA  | 20952 |
| P51148 | NPASRSQCCSN  | 21040 | P55773 | KLDTRIKTRKN  | 20994 | P35908 | AFGSSVTFSTR  | 20951 |
| P17098 | ASMLFDIREST  | 21040 | O43736 | EFIVETKICQE  | 20992 | P09329 | SVSYLFSHVPL  | 20950 |
| P29376 | PQNLWNPTVRS  | 21039 | Q9Y5J6 | AEQPGVSPSGS  | 20991 | P49888 | KESTLKFRTET  | 20950 |
| P12750 | DKRLAAKQSSG  | 21039 | P04271 | TTACHEFFEHE  | 20991 | P17019 | KHKIHTGEKPE  | 20949 |
| Q13571 | GGPAPPYSEV   | 21037 | P32942 | EAMGEEPSRAE  | 20990 | O95838 | TMEIELESEI   | 20948 |
| Q14587 | MHQRTHTVDDKH | 21037 | Q15323 | PRCGPCNSFVR  | 20990 | P06315 | YYFCLQHDNFP  | 20948 |
| Q02386 | PSSEDSHRKTR  | 21037 | Q02383 | GAAPRPPPKPM  | 20990 | O95059 | LSGNSRELVDL  | 20947 |
| P31997 | MIGVLARVALI  | 21036 | Q9NZV5 | GLRRGLPLLQP  | 20990 | Q9NRM2 | KQSSILNQLLD  | 20947 |
| Q14532 | MPCSPCPQGRY  | 21036 | Q14190 | LGASVIITNCR  | 20990 | Q16816 | AVLLSLAEEDY  | 20946 |
| P11174 | ATHSSRFIPLK  | 21035 | P04643 | AAGTKKQFQKF  | 20989 | P39026 | QKYDGHLPGK   | 20944 |
| Q15835 | SSSKGMCLVS   | 21034 | P17008 | GARARYKSYR   | 20989 | P01613 | FGVASKVESKR  | 20943 |
| O14771 | LPAGPSACAH   | 21034 | P05109 | HKKSHEESHKE  | 20989 | Q01650 | QKLMQVVPQET  | 20943 |
| P41091 | GVTKIPTVDDD  | 21033 | O00442 | CQGIGMTNPNL  | 20988 | Q01629 | IIPVLVQAQR   | 20942 |
| Q13349 | FSCVAPNVPLS  | 21033 | O15370 | PSSIADLVFTY  | 20988 | O75600 | VEVGRHLHALP  | 20942 |
| P47736 | ASEQHMPQLGC  | 21033 | O14709 | TNESKIEIQKI  | 20988 | Q03938 | SSTLATHKKIH  | 20941 |
| Q13228 | PGGDCSSDIWI  | 21033 | P23821 | DVNFEPFQFQL  | 20986 | P52429 | TSDQEDIKATE  | 20940 |

**ID:** ID from Uniprot Database (<http://www.uniprot.org/>) **Sequence:** Listed sequences match the Uniprot ID, but for the array experiments and for the computational predictions, the cysteines were changed to serine. **NA:** not available. **BLU:** biochemical light unit.

Table S1: Binding data from CAL peptide array.

| ID     | Sequence     | BLU   | ID     | Sequence     | BLU   | ID     | Sequence     | BLU   |
|--------|--------------|-------|--------|--------------|-------|--------|--------------|-------|
| P26440 | VIGRAPNADFH  | 20938 | P80697 | YVDGVEVHNAK  | 20881 | Q14141 | QTLKRDKEKKN  | 20830 |
| P17181 | KTSEELQQDFV  | 20936 | P10721 | SSQPLLVHDDV  | 20880 | P13866 | TVAVFCHAYFA  | 20830 |
| Q15477 | DIVFAASLYTQ  | 20936 | O14896 | SMQLPPALPPQ  | 20879 | P23152 | SRSRSRSNERK  | 20826 |
| Q13325 | LTALCELRLSI  | 20935 | O60259 | DWIKKIIGSKG  | 20879 | Q9NPC8 | PMSANLVDLGS  | 20825 |
| P05771 | SYTNPEFVINV  | 20933 | Q14563 | THEFERAPRSV  | 20879 | P12757 | QILKSSKTAKE  | 20824 |
| P06702 | HHKPGLGEGTP  | 20932 | Q02447 | LVTVSGNETME  | 20879 | P13624 | NMKGMMGFNNM  | 20824 |
| P07557 | RSASEPSLHRT  | 20931 | P19525 | KSPEKNERHTC  | 20876 | P57057 | ATGDQVPFKEQ  | 20823 |
| P06703 | LALIYNEALKG  | 20930 | P17023 | TGEKPYSCKVC  | 20876 | P18583 | VYIVYLSDFV   | 20823 |
| P08578 | DNITLLQSVSN  | 20929 | P02545 | RTQSPQNCMS   | 20874 | Q15811 | KLTTDMDPSSQ  | 20822 |
| P49588 | FAQLRLGDVKN  | 20929 | P46976 | NIKRKLDTYLQ  | 20873 | P04049 | TLTSPRLPVF   | 20822 |
| Q14847 | GMLPANYVEAI  | 20928 | Q14525 | SRCGPCNTFGY  | 20873 | P00338 | TLWGIQKELQF  | 20822 |
| Q9Y5J9 | RFAQIVQKGGQ  | 20926 | P13010 | GGDVDDLLDMI  | 20873 | Q9NQX7 | FVVETLICGVV  | 20821 |
| P17014 | VHYRTHSGEKP  | 20925 | P35265 | AKADGIVSKNF  | 20873 | P46020 | EFLPHSICAMQ  | 20821 |
| O14879 | RELLSNSEQLN  | 20924 | P54920 | KTIQGDEEDLR  | 20873 | Q16719 | TSILDSAETKN  | 20821 |
| Q05481 | ILANTVKPLLY  | 20924 | P49862 | KWINDTMKKHR  | 20872 | O00338 | EGTSINFCMEL  | 20820 |
| O00186 | PKDKVSLIKDE  | 20923 | P04433 | VYYCQQRSNWP  | 20872 | P51170 | QLTDTQMLDEL  | 20817 |
| P52292 | VQDGAAGTFFN  | 20922 | O95613 | QILLQRNPATR  | 20871 | Q13247 | SRSRSRSSSRD  | 20817 |
| P01579 | QMLFRGRRASQ  | 20922 | Q15493 | VKGIAPYSYAG  | 20869 | O15041 | HYRLPRHTLDS  | 20817 |
| Q00532 | TKKLNRYRFPNI | 20921 | P36896 | SQLSVQEDVKI  | 20867 | P42704 | QQLRLKRENS   | 20816 |
| P01598 | FGQGTKEVEKG  | 20921 | P17612 | NEKCGKEFSEF  | 20866 | O15532 | VAAIKAALAQG  | 20812 |
| Q9Y5W8 | QTTQAPSLVKR  | 20920 | Q08881 | RQLAEIAESGL  | 20865 | P46977 | KDLNDRGLSRT  | 20812 |
| P17016 | AHQRGHTGEKP  | 20920 | Q9U143 | QYHGRKGTVKQ  | 20865 | P31749 | PQFYSYASSTA  | 20811 |
| P12956 | LLEALTAKHFQD | 20918 | P37088 | ASSSTCPLGGP  | 20865 | P20700 | PRASNRSCAIM  | 20811 |
| P06239 | TATEGQYQFPQ  | 20918 | P43330 | VVLNRPLIAGK  | 20865 | Q9NSI8 | VHKIITEPSD   | 20811 |
| P31949 | FLKAVPSQKRN  | 20918 | P22694 | TEKCAKEFGEF  | 20864 | P08842 | DREKQDKRLSR  | 20811 |
| Q13449 | AASLLCLLSKC  | 20916 | P07195 | LWDIQLDKLDL  | 20864 | P21583 | LQEKEREFQEV  | 20809 |
| Q15357 | SIIMLEALERV  | 20916 | Q13596 | EAFLEPAKAI   | 20864 | P01286 | LLQKHSRNSQG  | 20808 |
| P28702 | MEMLEAPQLA   | 20916 | Q04837 | FLSDQTKKEK   | 20863 | Q14749 | CYFIHVLKRTD  | 20806 |
| P19013 | IIGTTTLNKR   | 20915 | P49441 | VQNLAPAEHTH  | 20862 | O14828 | AGAAENAFRAP  | 20806 |
| Q16629 | PRRSASPERMD  | 20915 | Q92503 | SQSHSSSMISR  | 20862 | P23327 | ALADMLETPEP  | 20806 |
| P55822 | EGEPEGEDEDS  | 20915 | Q16613 | GHFPLRRNSGC  | 20861 | Q9Y5W3 | DHLALHMKRHM  | 20804 |
| P13500 | HLDKQTQTPKT  | 20915 | P41225 | AVNGTVPLTHI  | 20861 | P08922 | LTHSGYGDGSD  | 20804 |
| O76009 | ARCGPCNTFGY  | 20914 | P26006 | VTSWQTRDQYY  | 20860 | P20663 | PNSMVASPIEA  | 20803 |
| Q04860 | QTLAGHGGRRLL | 20914 | P04264 | FVSTTYSYGVTR | 20860 | Q15491 | STSTPFLSLPE  | 20803 |
| Q13242 | SPHYSPFRPY   | 20913 | P34896 | SLFPLPLGPDF  | 20859 | Q13573 | HEHEGKKRRKE  | 20802 |
| P41229 | PCPQPPQDQQL  | 20913 | P09912 | HKYLDSEEDDE  | 20859 | P21399 | ILNYMIRKMAK  | 20801 |
| O75362 | NAHYRPQKRR   | 20913 | Q9Y287 | NKFAVETLICS  | 20858 | Q15726 | AGRGWGAGAGQ  | 20801 |
| P48048 | SEVNETDDTKM  | 20912 | Q01546 | TTSSSQHSSTK  | 20858 | P06312 | VYYCQYYSTP   | 20801 |
| P06213 | RILTLRSPNS   | 20911 | P14316 | SDITQARVKSC  | 20856 | Q14914 | YIIEGFENMPR  | 20801 |
| P06732 | QSIDDMIPAKQ  | 20910 | P29508 | SILFYGRFSSP  | 20856 | P29353 | LCLQQPVERKL  | 20801 |
| P14618 | FTNTMRVVPVP  | 20910 | O94804 | KFFPYSSADAS  | 20856 | O00142 | ILTPENRKHCP  | 20799 |
| P31323 | GTNMDIVEPTA  | 20909 | Q13275 | PRNRRHHPDPT  | 20854 | O75711 | KISFVIPCNNQ  | 20798 |
| P52824 | DRAPAPESDPR  | 20908 | P16066 | FGEGTRLEIKR  | 20853 | Q9NZ72 | RNKEQREEMSG  | 20797 |
| Q9UET6 | EMEDNEMSCSP  | 20905 | Q14653 | EGMDFQGPGE   | 20852 | P81133 | KGTSVIITNGS  | 20795 |
| P13795 | NQRATKMLGSG  | 20905 | P53708 | EQLTNDKTPEA  | 20852 | P11277 | ESLQPEPSHPY  | 20795 |
| Q15356 | EEEEEDGEMRE  | 20904 | Q99747 | EEDEYSGGLC   | 20852 | O43175 | QHVTEAFQFHF  | 20794 |
| O43761 | TSPKGYQVPAY  | 20904 | Q9UKQ9 | YLDWIQIEMEN  | 20851 | Q15531 | LASSIGCTLGL  | 20794 |
| O60220 | SKPVFSESLS   | 20903 | P07306 | LDKASQEPPLL  | 20851 | Q01105 | EEGEDEGEDD   | 20792 |
| P13861 | GSSVDLGNLQG  | 20903 | P43331 | MGRGNIFQKRR  | 20851 | P12035 | QSSQSSQRYSR  | 20790 |
| P42263 | YNVYGTESVKI  | 20902 | Q9NRJ3 | KHETYGHKTPY  | 20851 | Q07890 | LPLENAETPQ   | 20790 |
| P04183 | PQQLQCSPAN   | 20902 | P27930 | PHHQDFQSYPK  | 20849 | Q13277 | ALIIGLSVGLN  | 20790 |
| P38384 | HIPNNIIVGG   | 20902 | P23229 | ITKWNRNESYS  | 20849 | O15266 | KARKHAEALGL  | 20789 |
| P12755 | AGSEGAEELEP  | 20902 | Q02383 | QYNEDNRPIST  | 20849 | O75558 | TLCCFCCPCLK  | 20789 |
| Q9Y5J7 | AAKAGLGQPR   | 20900 | P02724 | VEIENPETSQ   | 20848 | P49619 | FSLRRKSRSKD  | 20788 |
| P15735 | ITEDEAVLVLG  | 20900 | P40305 | SAIAAVIARFY  | 20848 | P55735 | ASVTEGQQNEQ  | 20788 |
| Q05513 | NPLLLSTEEVS  | 20899 | Q99828 | PDFASSFKIVL  | 20848 | P51688 | SPQCQLPHNEL  | 20788 |
| P34897 | RAFFPMPGFDEH | 20898 | O75838 | PDFLSTFHIRI  | 20848 | O95793 | GNGPMSVCGRC  | 20788 |
| O43187 | CVGLEPPQDVT  | 20898 | Q9UHI5 | KDKDVAGQPQP  | 20848 | O00515 | QKSDSSSLDAEV | 20786 |
| P31213 | KSRKALIPFIF  | 20897 | Q15831 | KIRRLSACKQQ  | 20848 | P56199 | FKRPLKKKMEK  | 20784 |
| P48551 | DVDLGDGYIMR  | 20894 | O15270 | FDETTYEETED  | 20847 | Q9Y5L5 | LCCWCICKELL  | 20782 |
| Q12756 | LSRRRSAGQMR  | 20894 | P55855 | DVFQQTGGVY   | 20847 | Q15005 | HDSLAIERKIK  | 20781 |
| P34168 | ALLQIVPAVH   | 20894 | Q01130 | KSPEEEGAVSS  | 20845 | NA     | FGQGTKLQIKR  | 20780 |
| Q15532 | YDQGVYGNYYQ  | 20893 | O75368 | KEAEVQAKQQA  | 20845 | P18428 | FLGANVQYMRV  | 20778 |
| P51460 | TQQDLLTLCPY  | 20892 | O15131 | QQEAPMDGFLQ  | 20844 | P51826 | LHWLRNSAHL   | 20777 |
| Q13797 | EDSWDWWQKNQ  | 20892 | P01593 | FGQGTKEIKR   | 20844 | P08294 | KRRRESECKAA  | 20776 |
| Q9NZV6 | KGKETSASQGH  | 20892 | P38391 | MLHIWGYKTRS  | 20844 | P51649 | LELKYVCYGG   | 20776 |
| Q13813 | YVEFTRSLFVN  | 20892 | O60674 | RVDQIRDNMAG  | 20843 | P01042 | SYFDFLTDGLS  | 20775 |
| P12532 | RIPTPVIHTKH  | 20891 | P01604 | FGQGTKLDIR   | 20842 | P46019 | ELLPNSGCQMQ  | 20775 |
| P38484 | EKEQEDVLQTL  | 20890 | P37023 | SNSPEKPKVIQ  | 20841 | O14497 | ICDVLFLIGQS  | 20774 |
| P30085 | DEVVQIFDKEG  | 20890 | P21127 | SAAGPGFSLKF  | 20841 | P01594 | FGQGTKEIKR   | 20773 |
| P05127 | NSEFLKPEVKS  | 20890 | P04432 | TFGGGTKVDNK  | 20841 | P80511 | LKAAHYHHTHE  | 20769 |
| P57726 | SEVGSMGALLF  | 20890 | P01842 | VEKTVPATECS  | 20841 | Q13435 | GGSKYKEFKF   | 20769 |
| P09914 | ADFENSVRQGP  | 20889 | P31151 | HGAAPCSGGSQ  | 20839 | Q12872 | AASKNLQTSAS  | 20768 |
| P27448 | IASKIANELKL  | 20889 | Q06945 | ESSISNLVFTY  | 20839 | P48058 | SGLAVIASDLP  | 20764 |
| NA     | FGQGTLEIKR   | 20889 | Q15404 | ISRKPLAAKNR  | 20838 | P35754 | LTRLKQIGALQ  | 20764 |
| P51168 | VIESDSEGDAL  | 20888 | O15235 | GRYDCGHVQKK  | 20838 | Q14746 | AAKDQATAEQP  | 20763 |
| P04279 | HLNNDNRNPLFT | 20888 | P13641 | GRGRGRGGPRR  | 20837 | P04278 | QSPGNGTDASH  | 20763 |
| P05455 | QKQTENGAGDQ  | 20886 | Q13094 | QCTLTHAAGYP  | 20835 | O43760 | TTEGYQPPPVY  | 20761 |
| P17021 | SHQRVHTGERP  | 20886 | Q14242 | GDDLTLHSFLP  | 20835 | O00570 | GVNGTVPLTHI  | 20761 |
| O43240 | MSWINKVIRSN  | 20885 | Q9NYY3 | YALNMLLQRCN  | 20835 | P41215 | QIDDLYSIHKV  | 20760 |
| P38935 | QRTSRRKERGT  | 20885 | O76014 | VPSPCPVFLQD  | 20834 | O14960 | NCDSSDPTAYL  | 20759 |
| P49223 | KEKCEKFKCKFT | 20884 | Q9UKR3 | TQQQKWLKGPQ  | 20834 | O75351 | KKFTEDFGQEG  | 20759 |
| Q16799 | AKIPGAKRHAE  | 20883 | P01617 | FGQGTLEIKR   | 20834 | Q93100 | KPNNDPCLIS   | 20757 |
| Q01892 | DSALLPAVRRR  | 20883 | O75638 | AFNVMFSAPIH  | 20834 | Q13683 | GPDGHGPGGTA  | 20756 |
| P48200 | GLLNLFVARKFS | 20881 | P19838 | YGQEGPLEGKI  | 20833 | Q13487 | ELLGRAATPAR  | 20756 |
| P13612 | WSYINSKSNDD  | 20881 | Q12840 | LFPLHMQETAAS | 20833 | P10147 | QKYVSDLELSA  | 20756 |
| P35790 | AYFHQKRLKGV  | 20881 | P30613 | YTNIMRVLSIS  | 20833 | Q16478 | PAGPRELAEHE  | 20755 |
| P18627 | EPEPEPEPEQL  | 20881 | P22612 | NEKCAKEFSEF  | 20830 | P23919 | ATEKPLGELWK  | 20755 |

**ID:** ID from Uniprot Database (<http://www.uniprot.org/>) **Sequence:** Listed sequences match the Uniprot ID, but for the array experiments and for the computational predictions, the cysteines were changed to serine. **NA:** not available. **BLU:** biochemical light unit.
